# Supplementary material for: 8-Gingerol mitigates MPP+-induced α-synuclein aggregation and NLRP3 inflammasome activation by inducing the insulin signaling pathway in SH-SY5Y cells
Source: Research Square preprint supplement (doi:10.21203/rs.3.rs-8729284/v1), 2026-02-11
Supplement: Supplementary file 1 [file 0331802dce244b07ca109c99.docx]

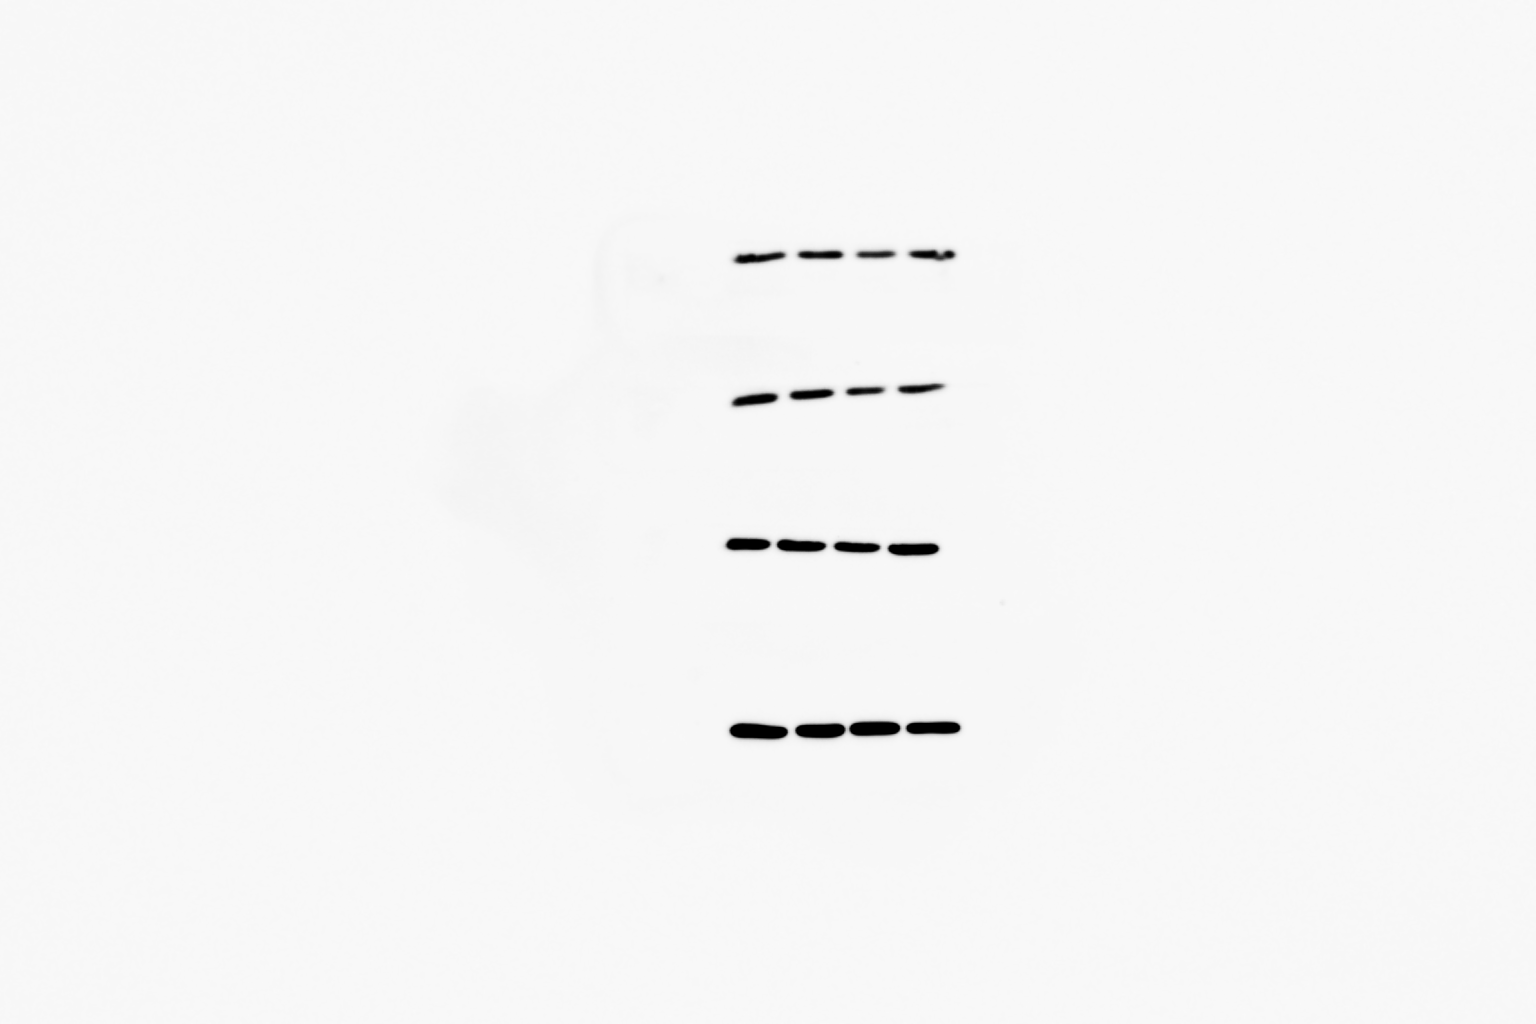

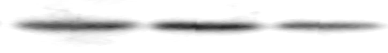


C

–

20

MPP+

8-Gingerol (µM)

Thr23p-Tau →

GAPDH →


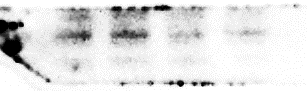

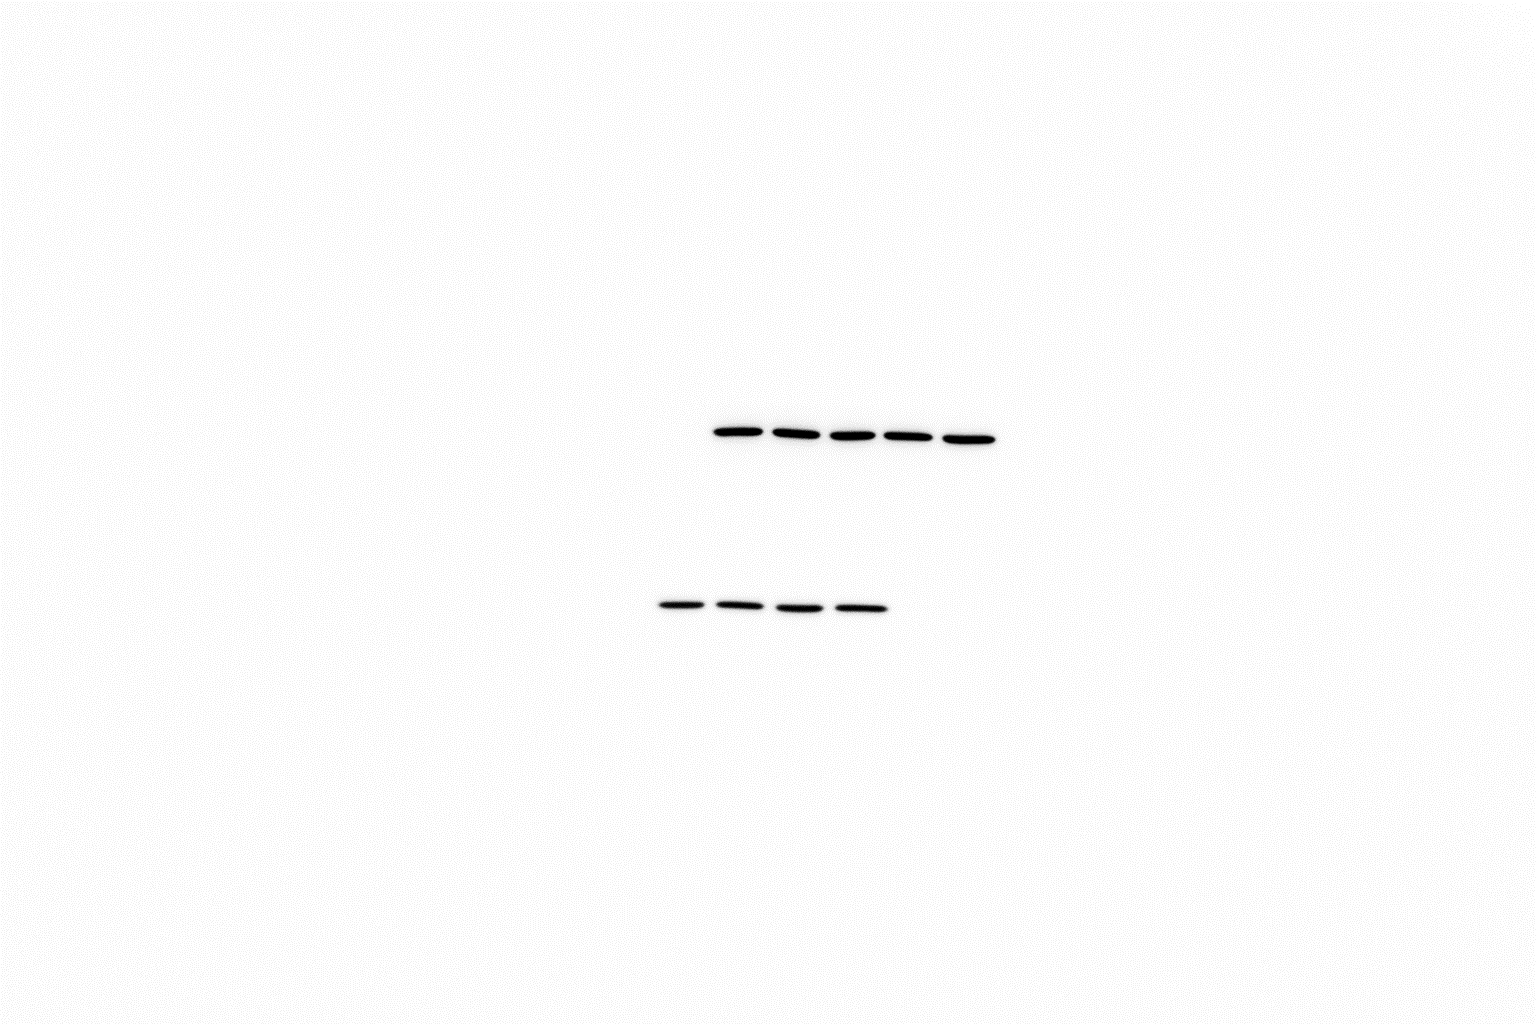


← 37 kDa

← 18 kDa

C

–

20

MPP+

8-Gingerol (µM)

Ser129p-α-synuclein →

GAPDH →

Figure 3 (F)

Figure 3 (D)

Figure 3 (A)

MPP+

C

–

20

Tyr216p-GSK-3β →


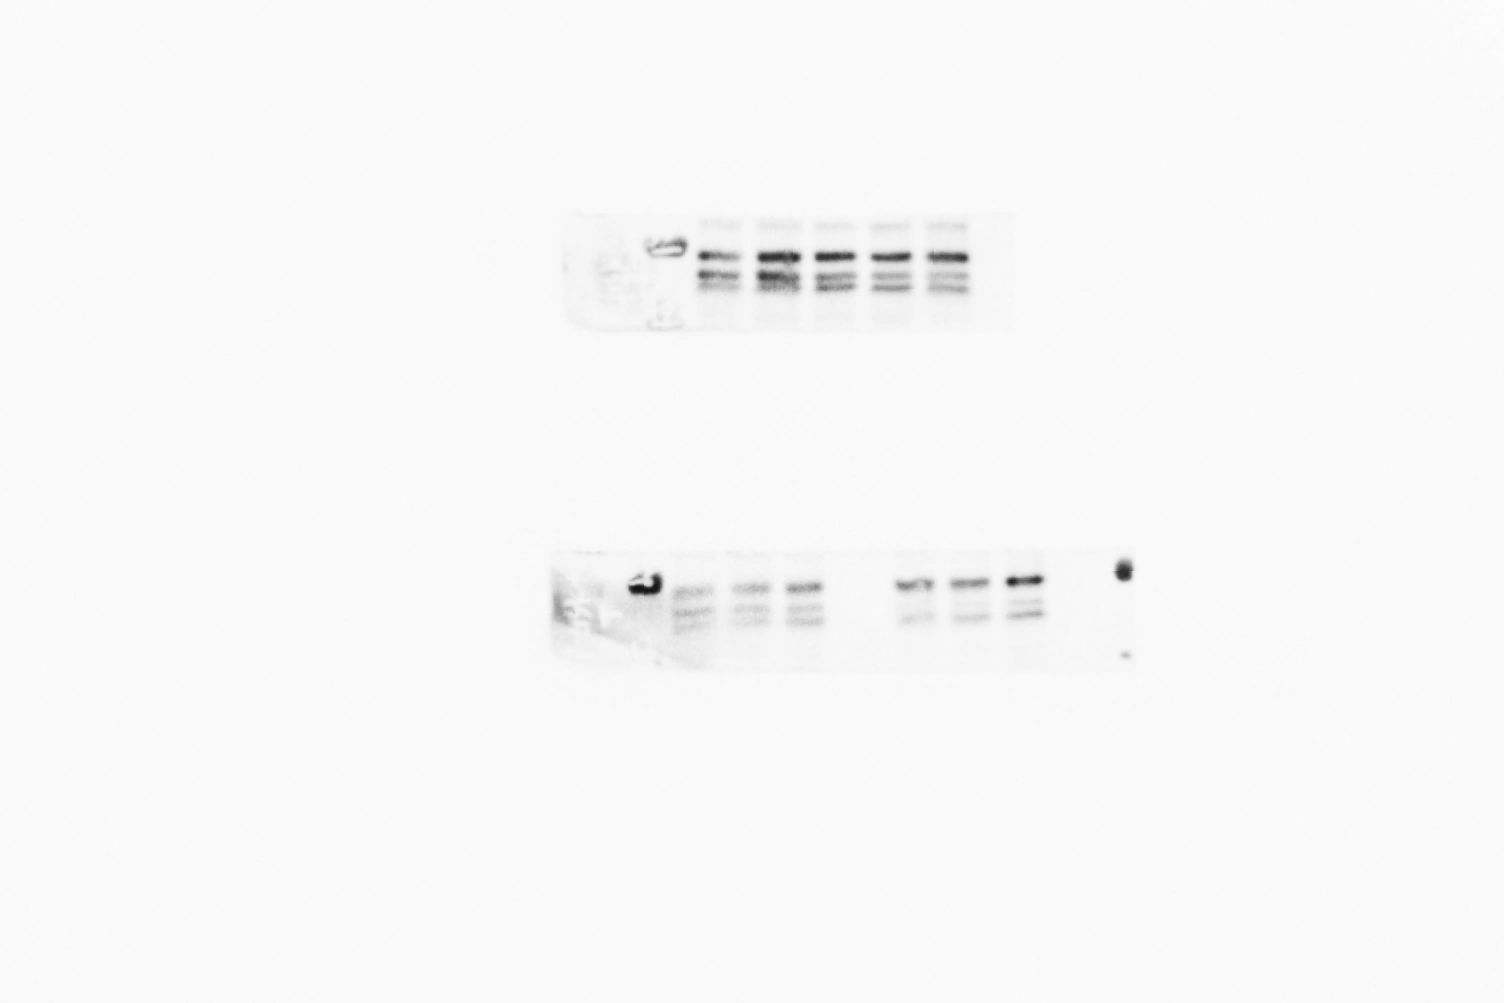


Ser9p-GSK-3β →


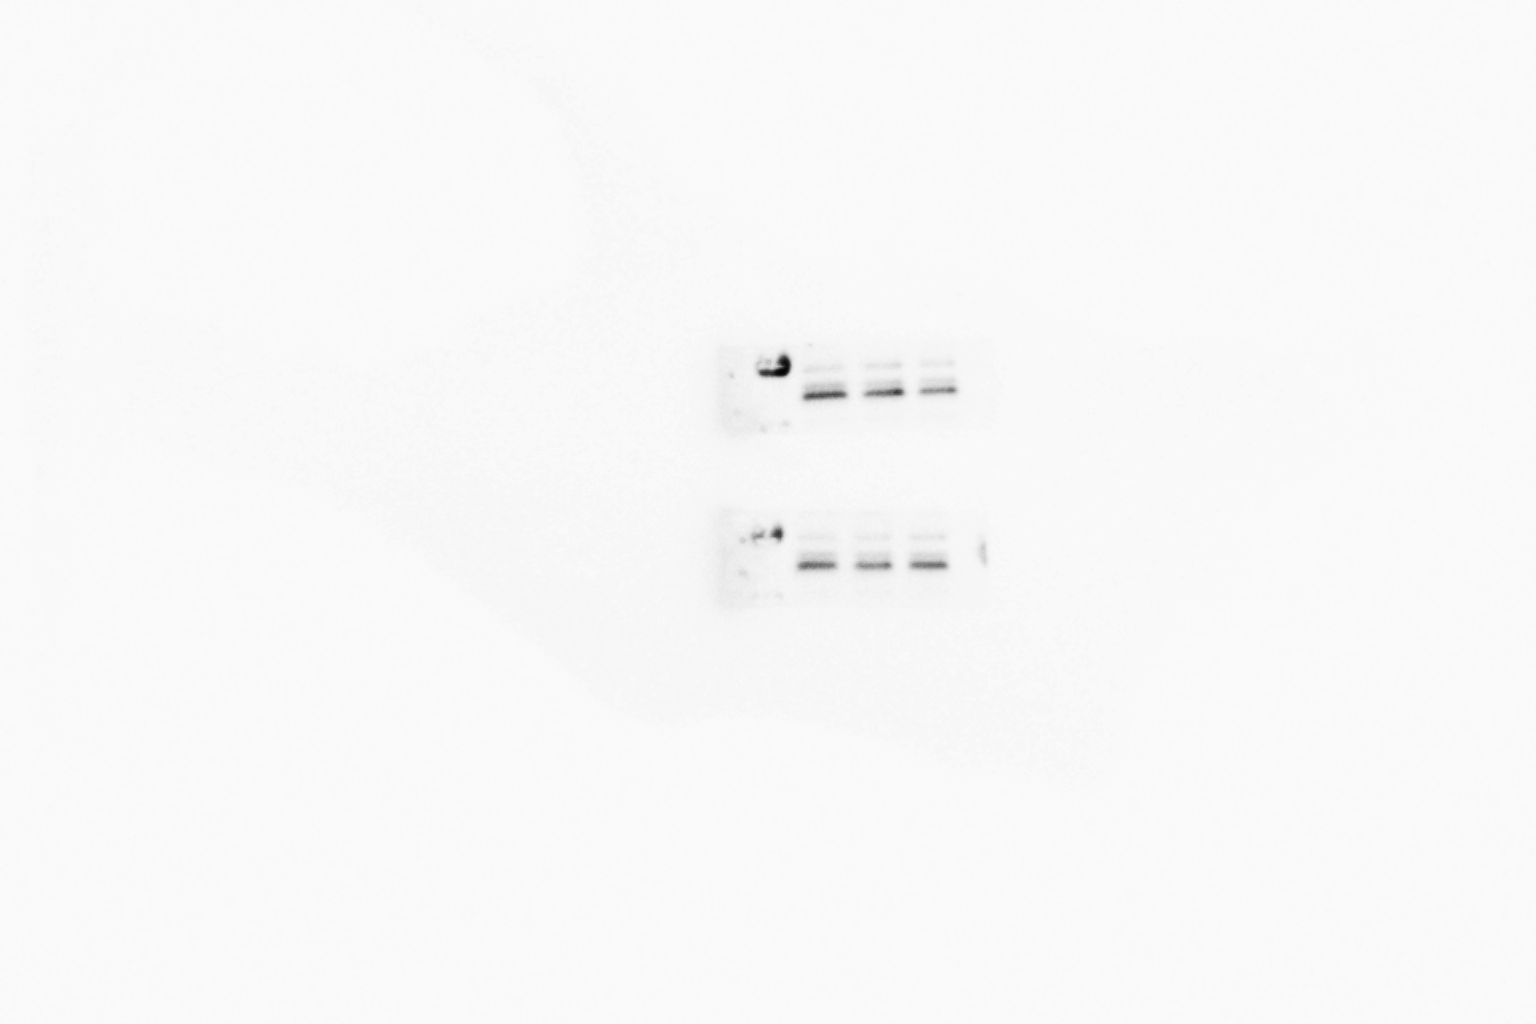


GSK-3β →


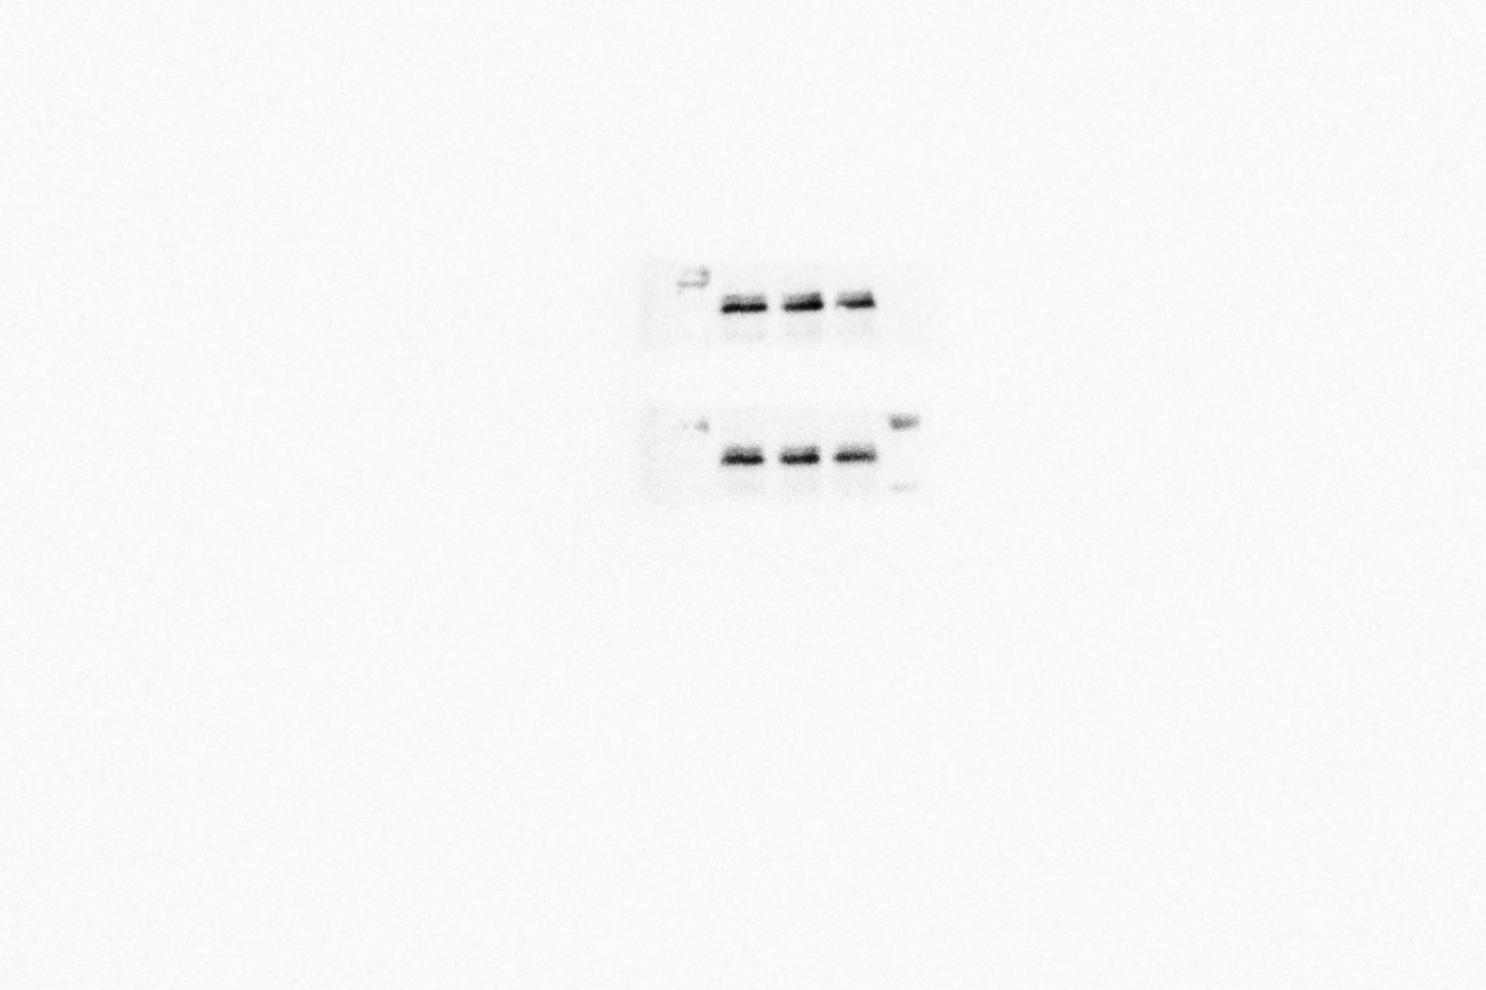


GAPDH →


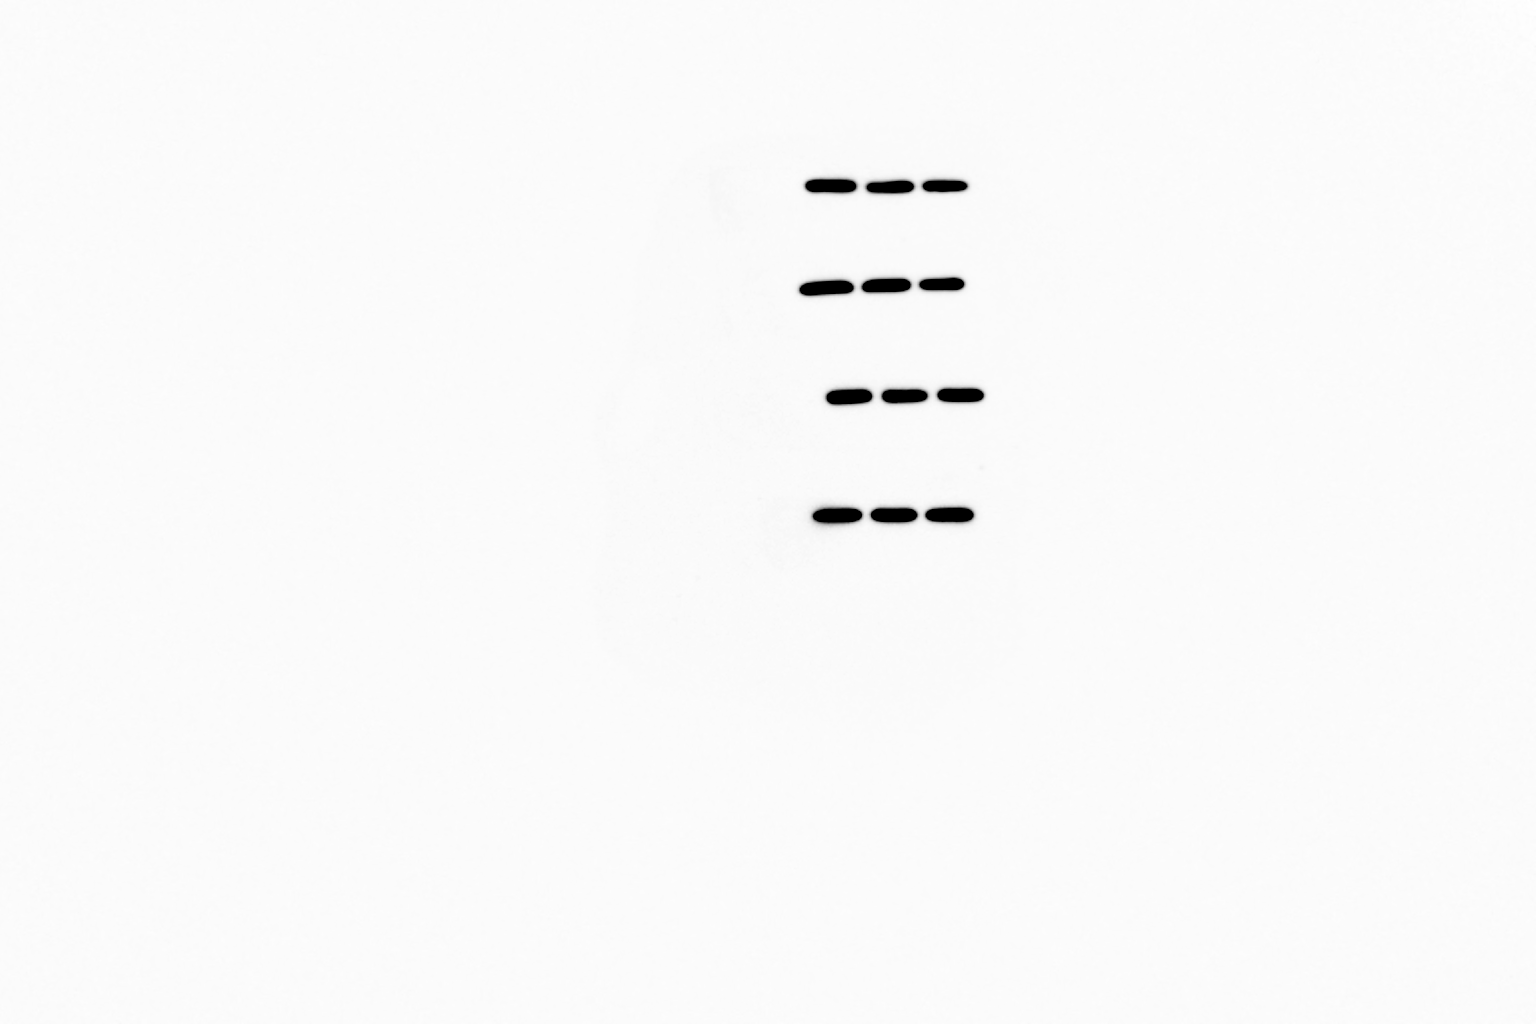


8-Gingerol (µM)

← 47 kDa

← 47 kDa

← 47 kDa

← 37 kDa


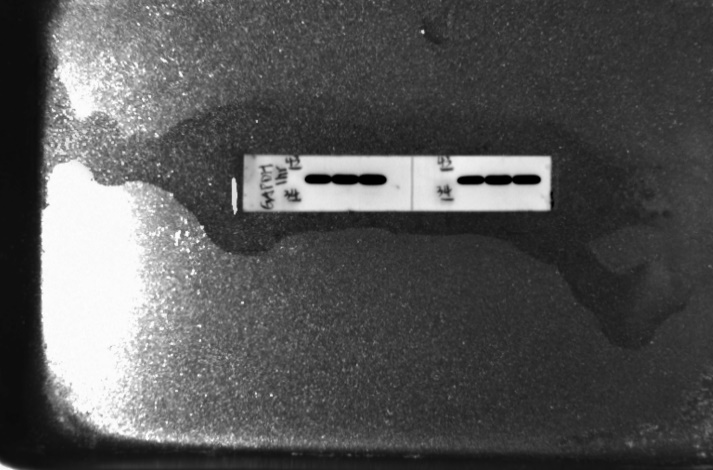

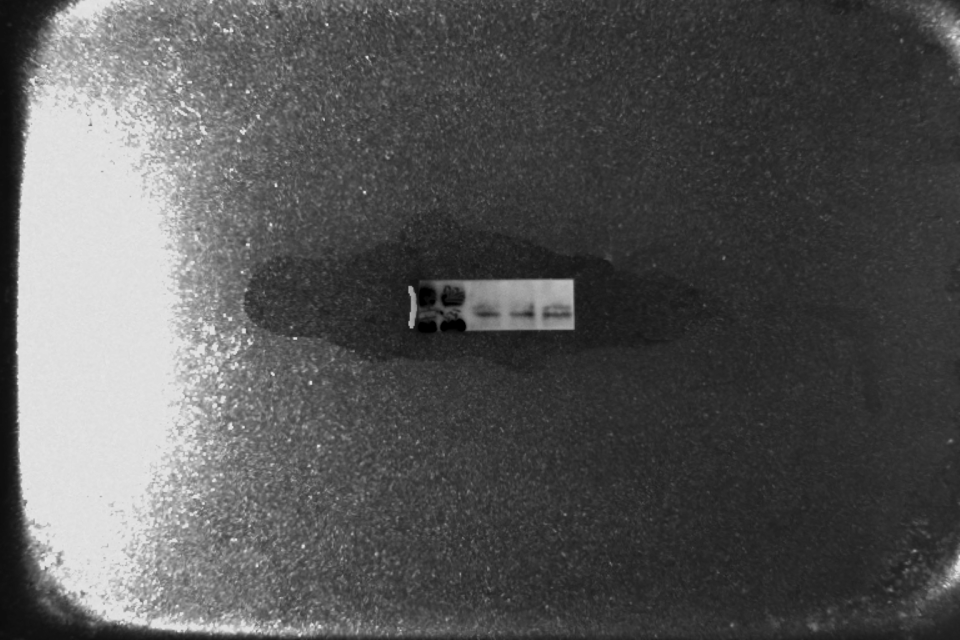

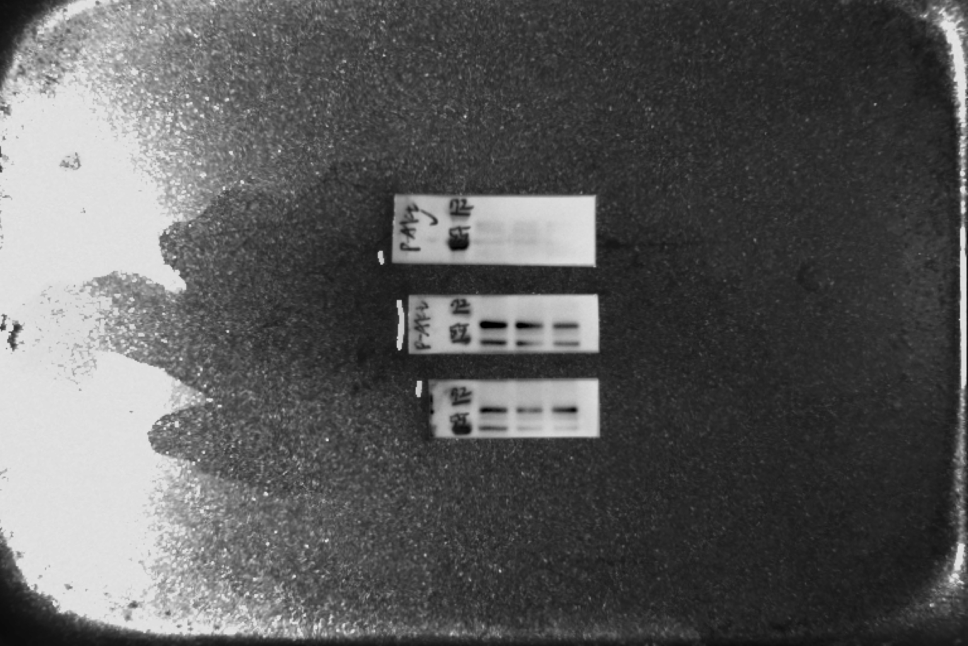

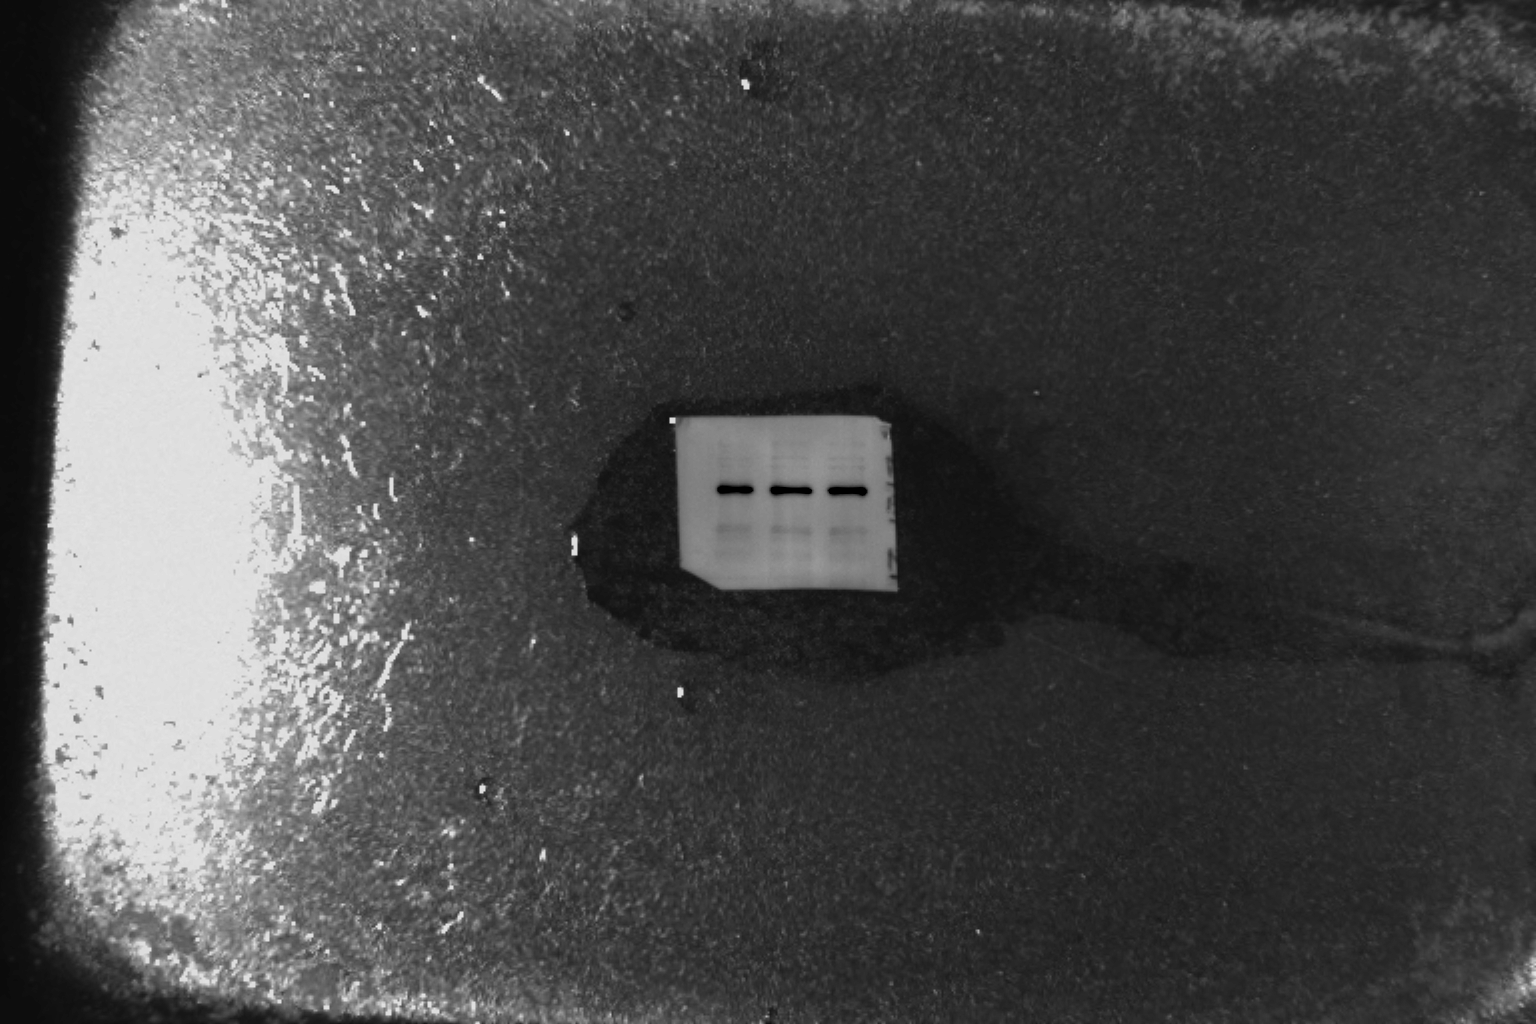

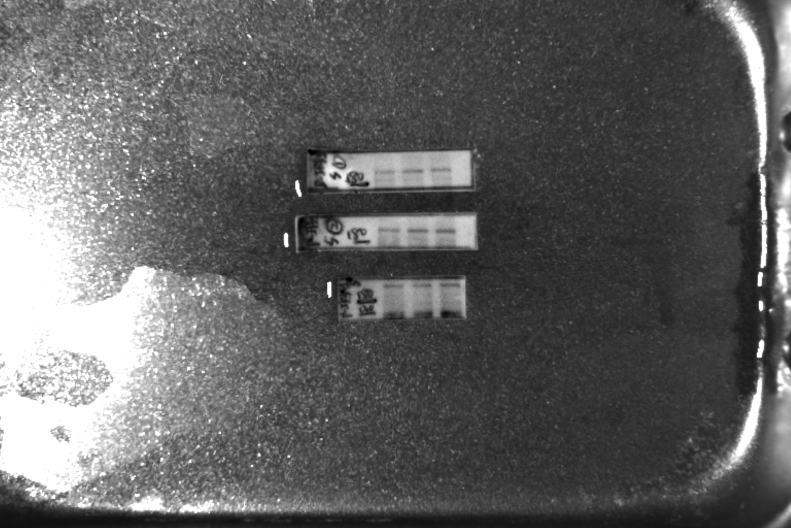

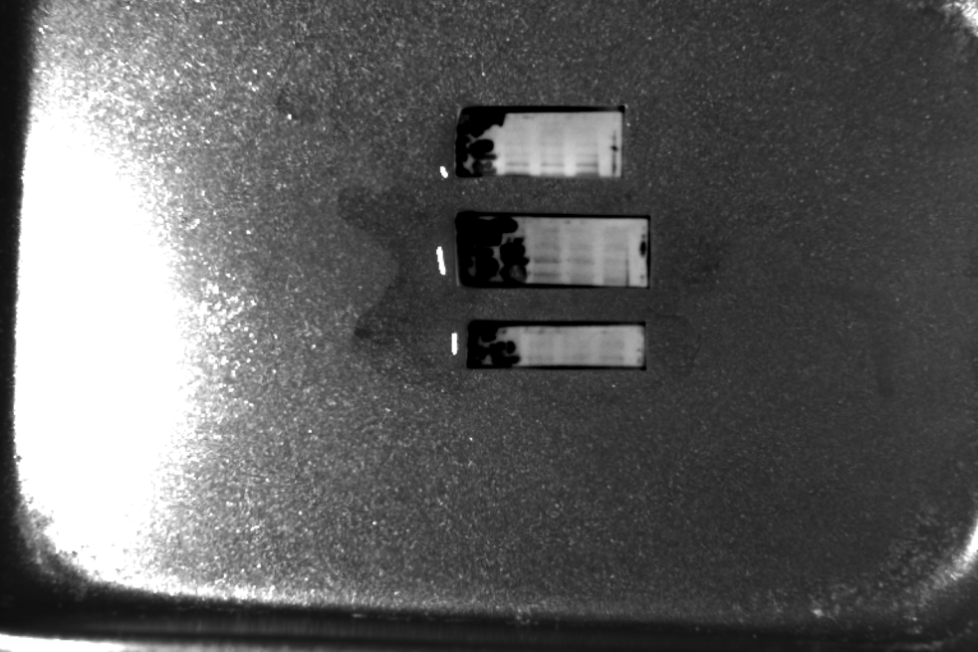


Figure 2 (A)

Ser307p-IRS-1 →


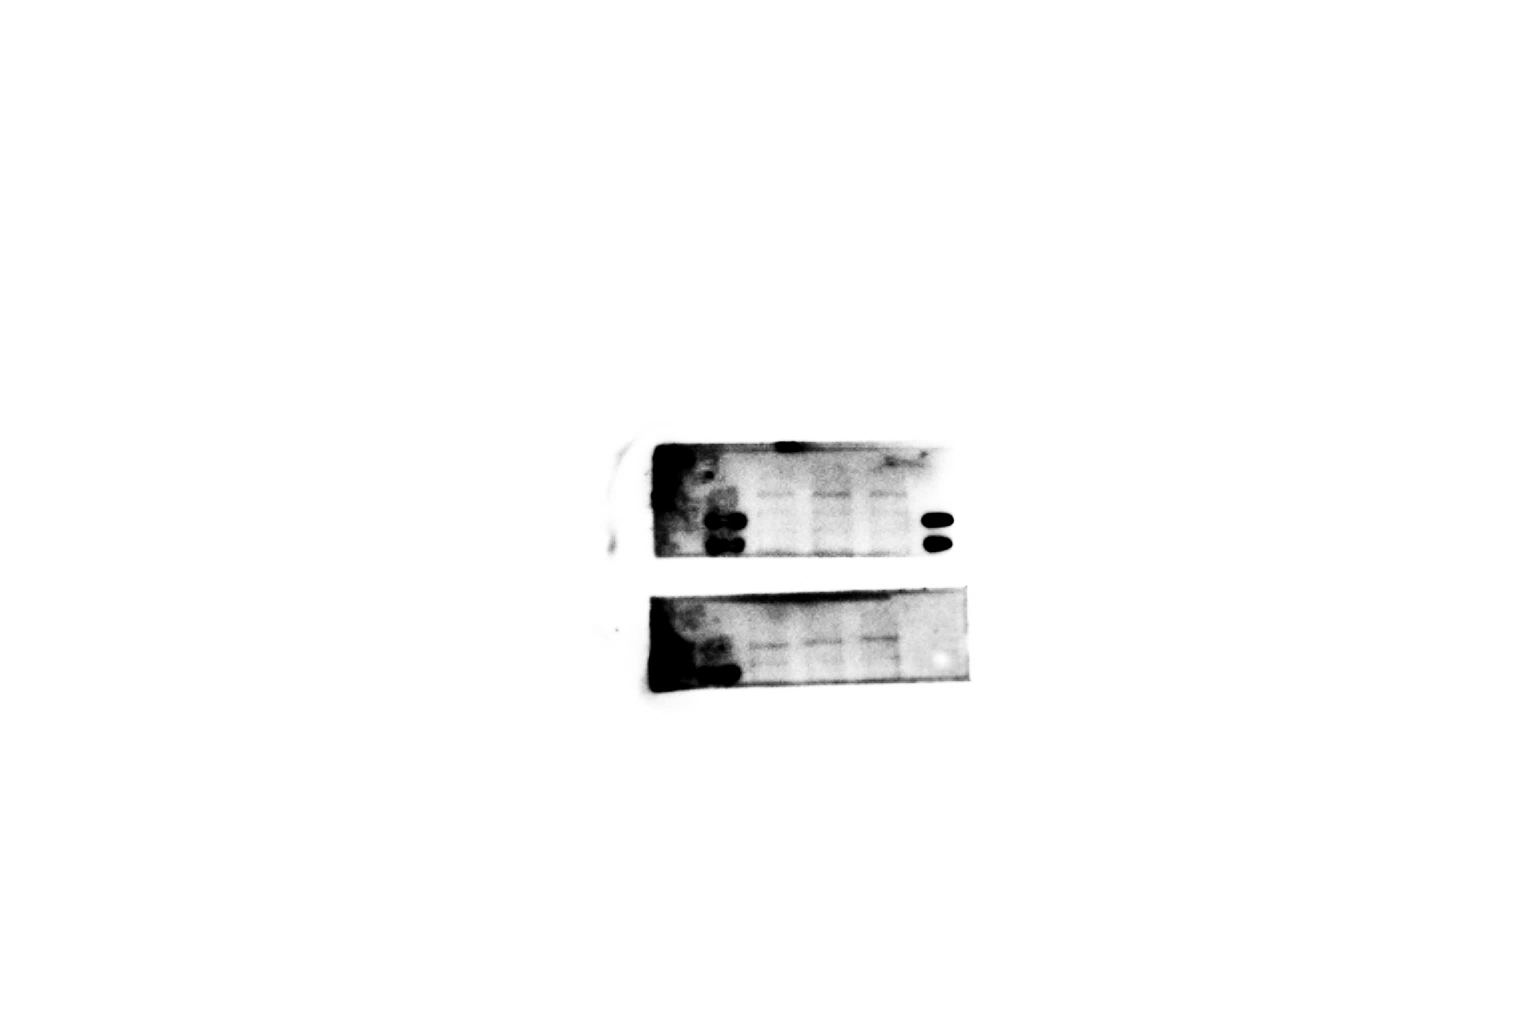

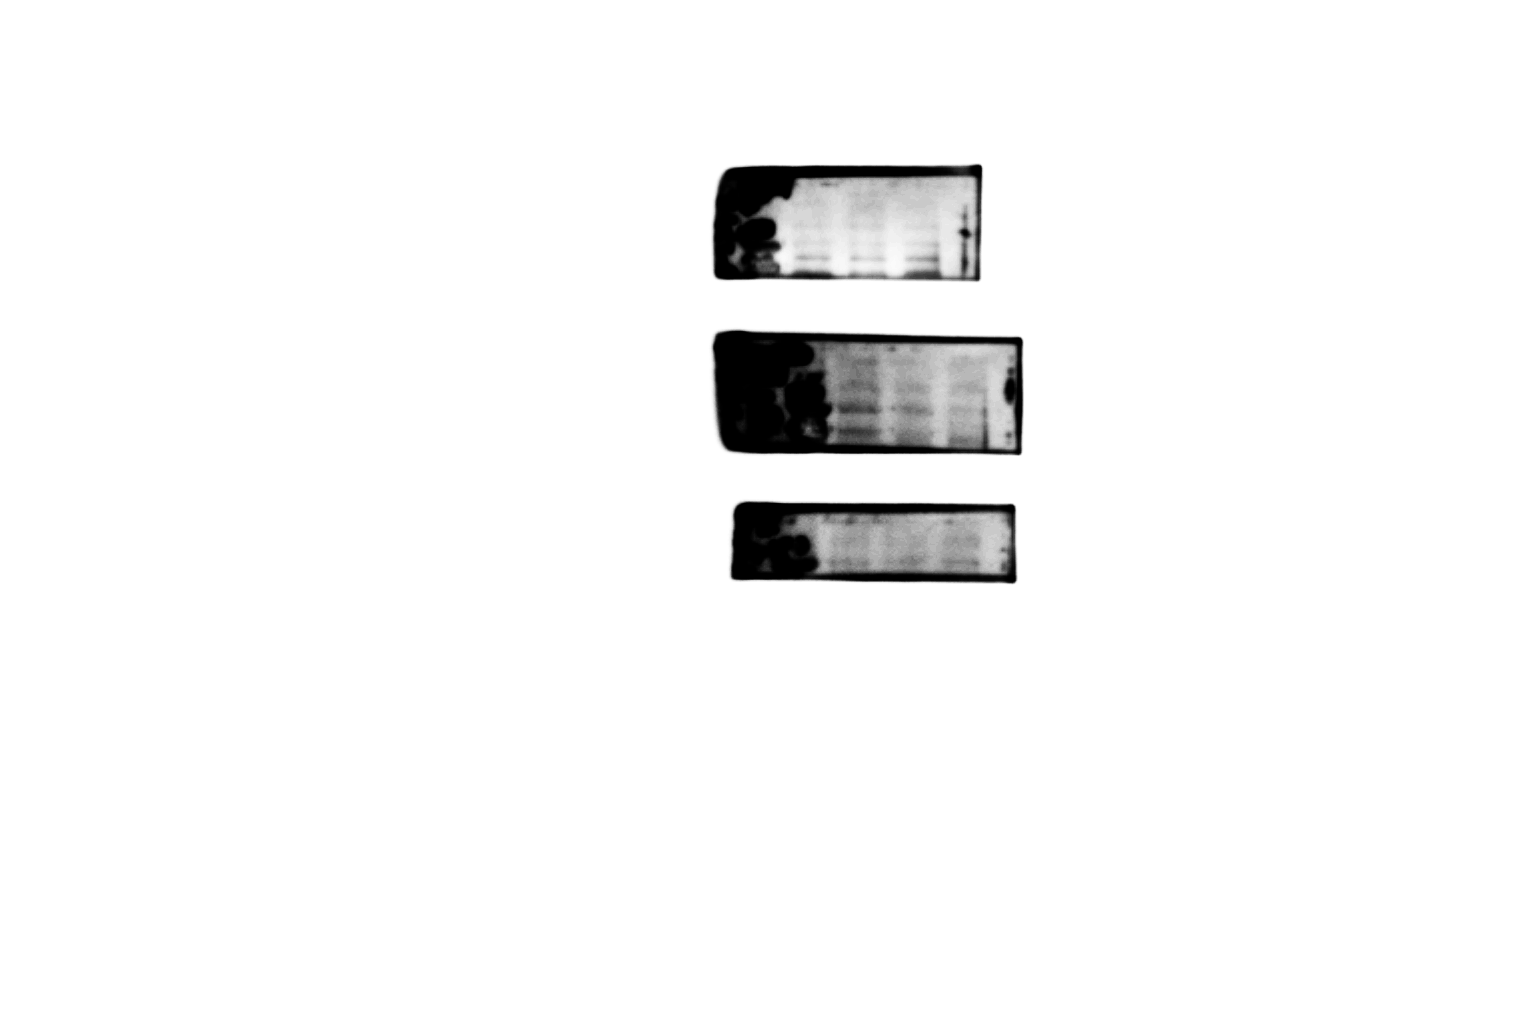


Tyr 632p-IRS-1 →

IRS-1 →


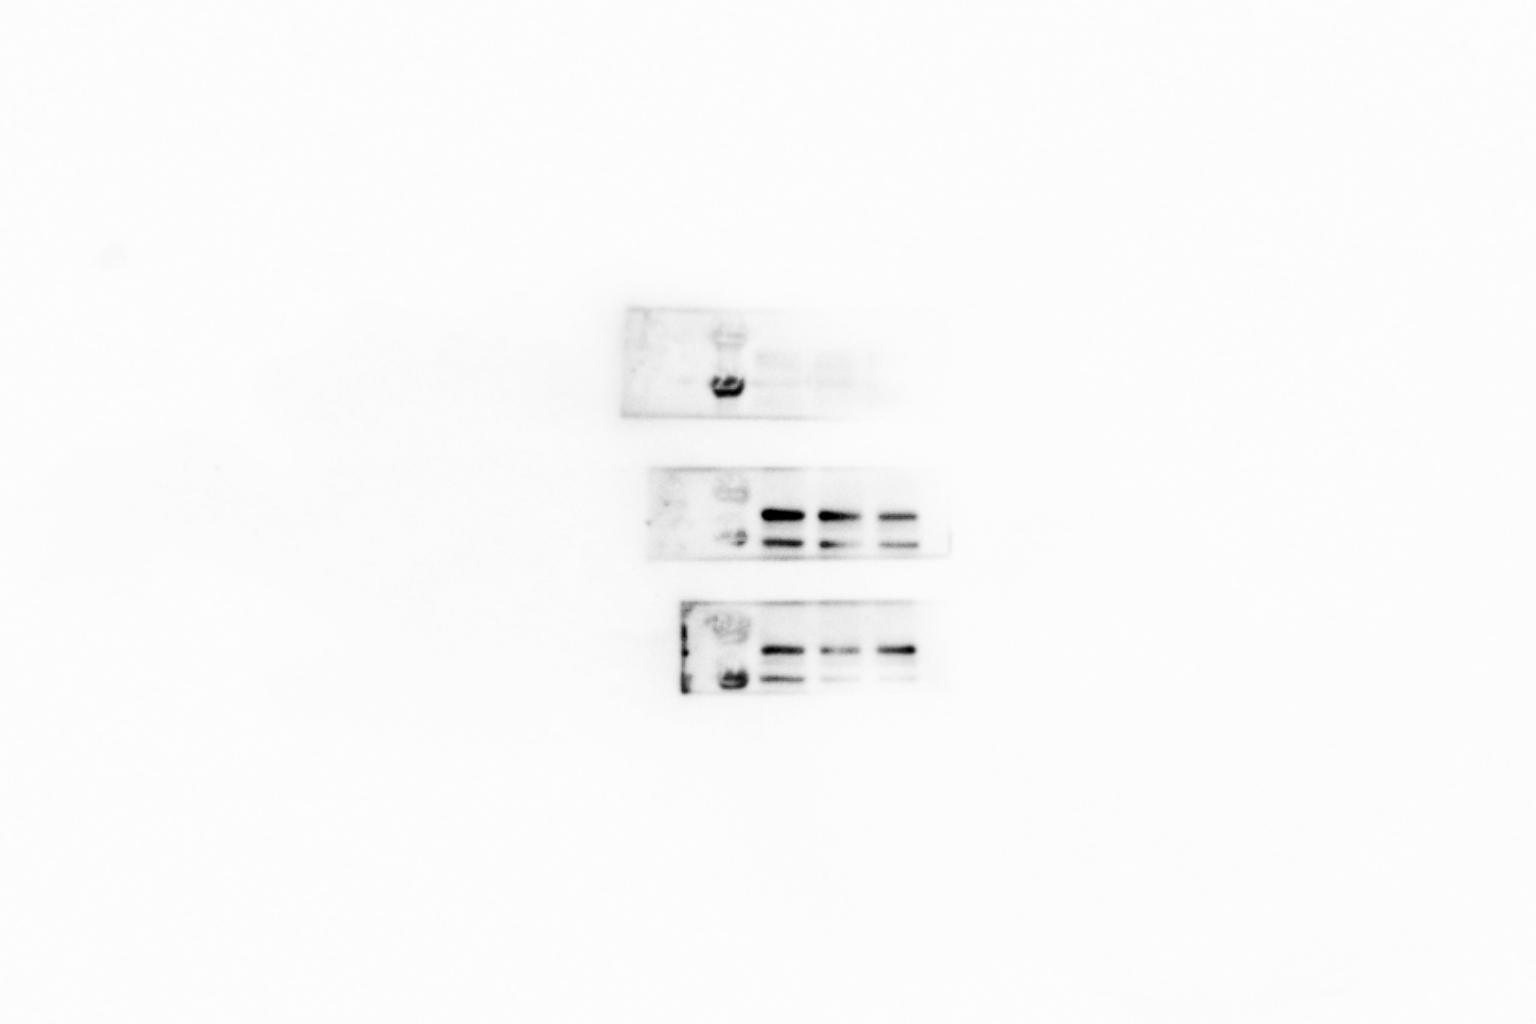

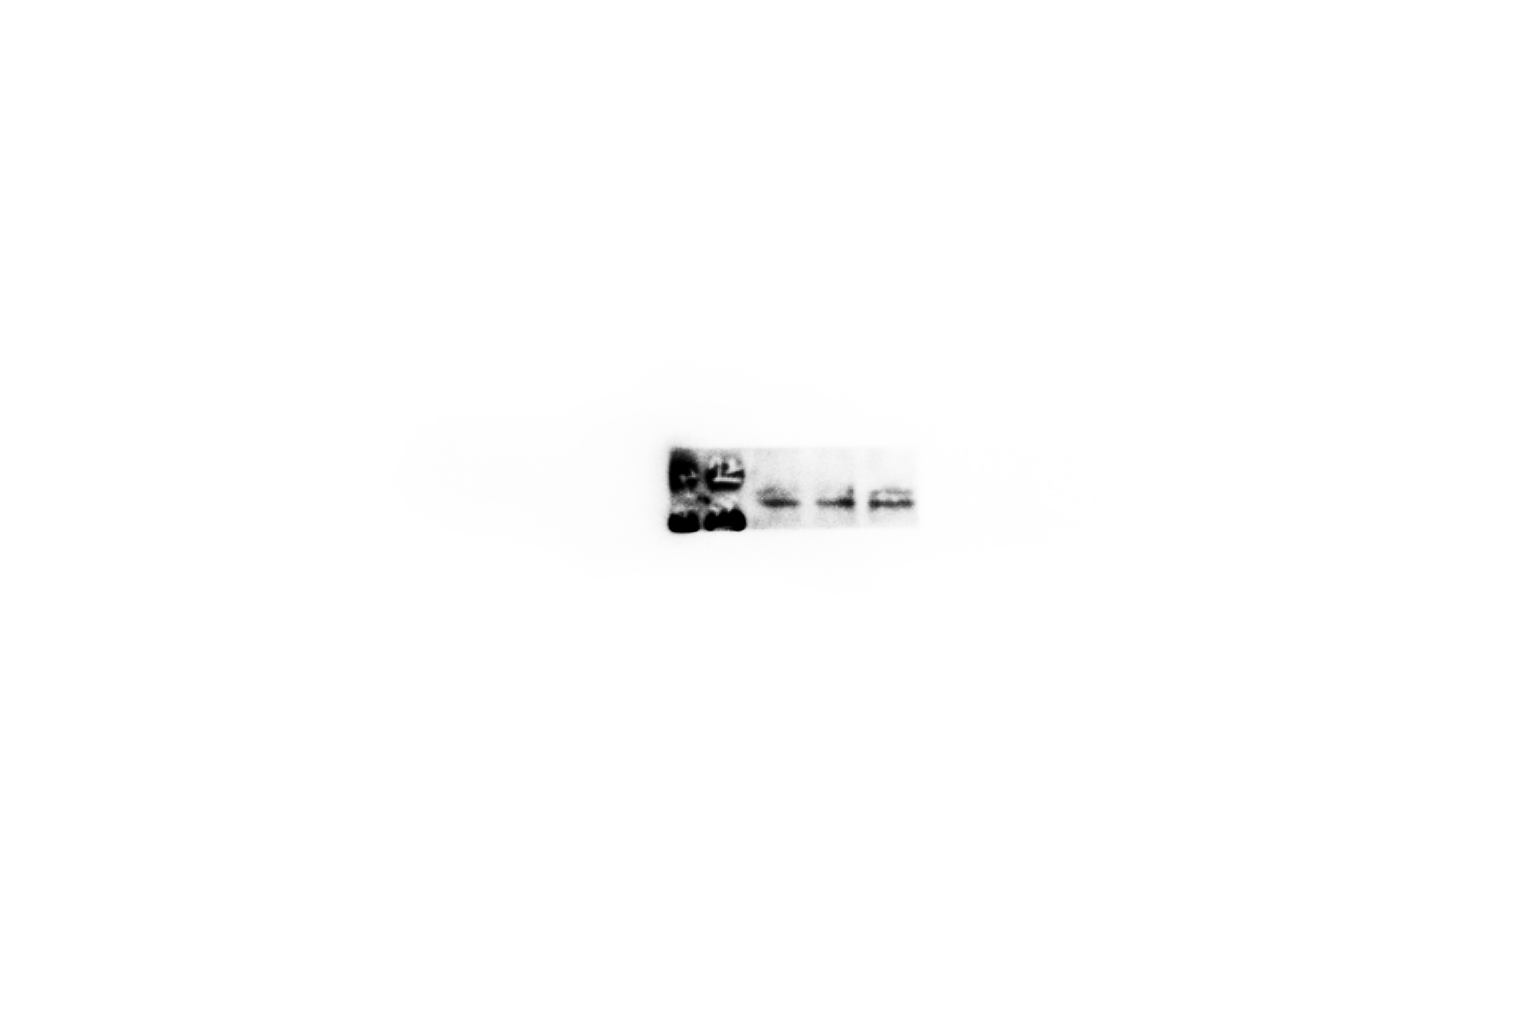


Ser473p-Akt →

Akt →

GAPDH →


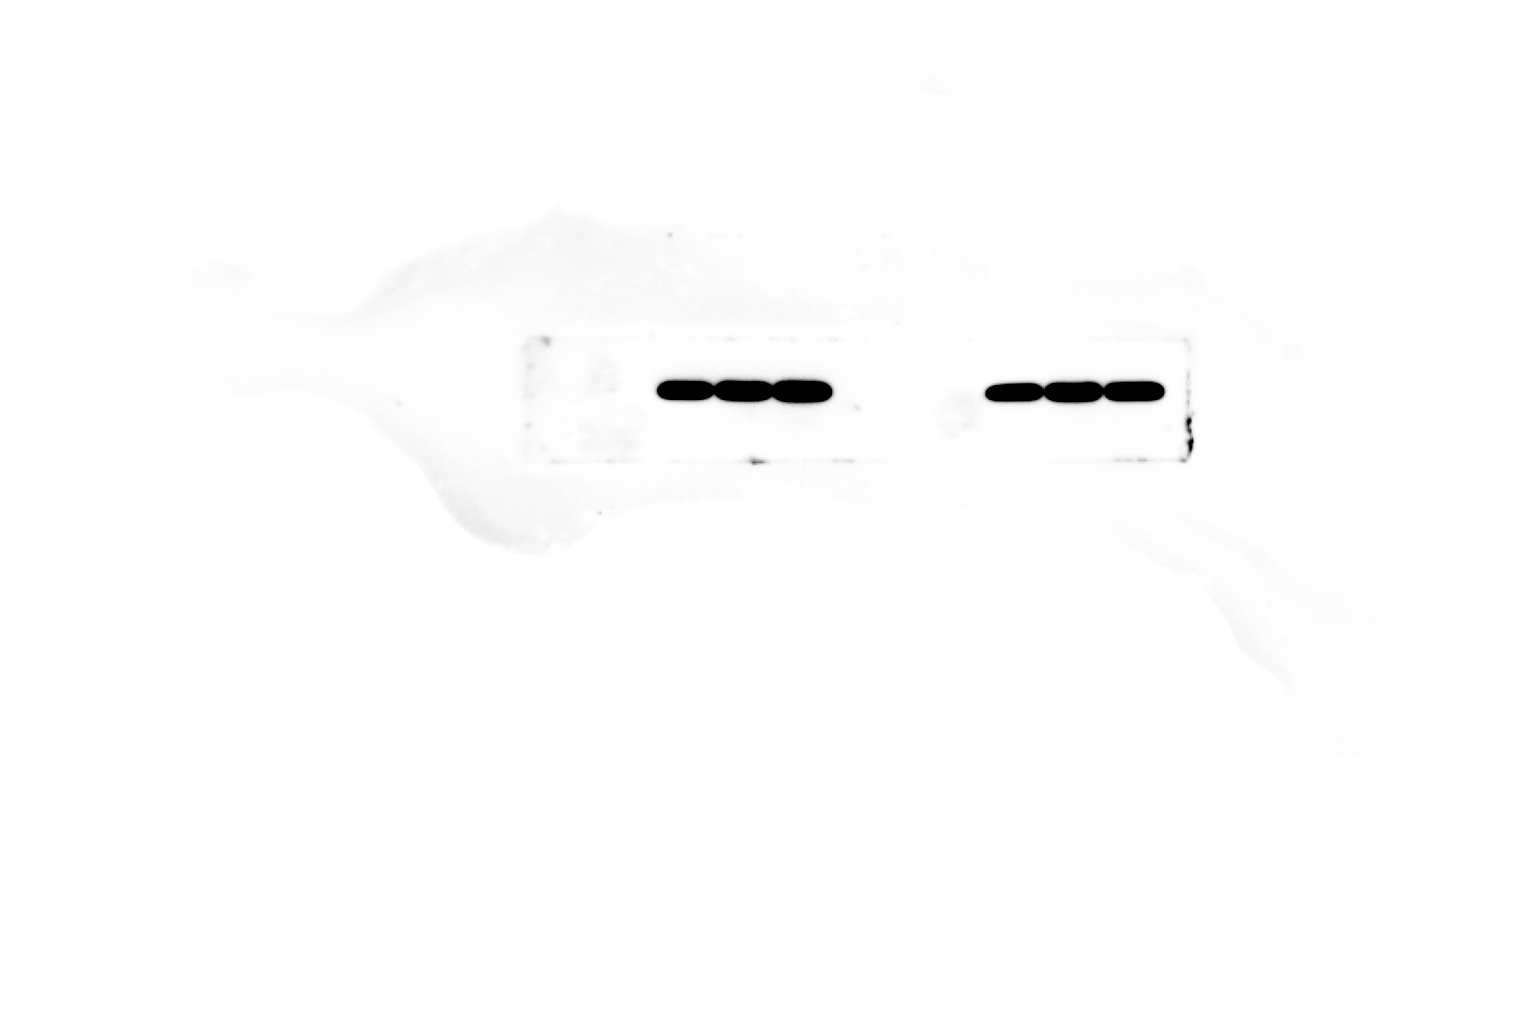


← 170 kDa

← 170 kDa

← 170 kDa

← 60 kDa

← 60 kDa

← 37 kDa


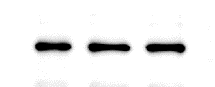


MPP+

C

–

20

8-Gingerol (µM)


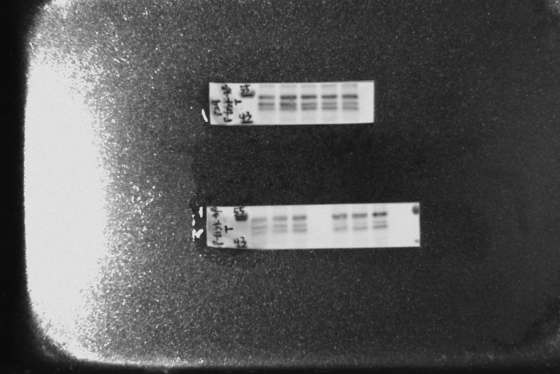

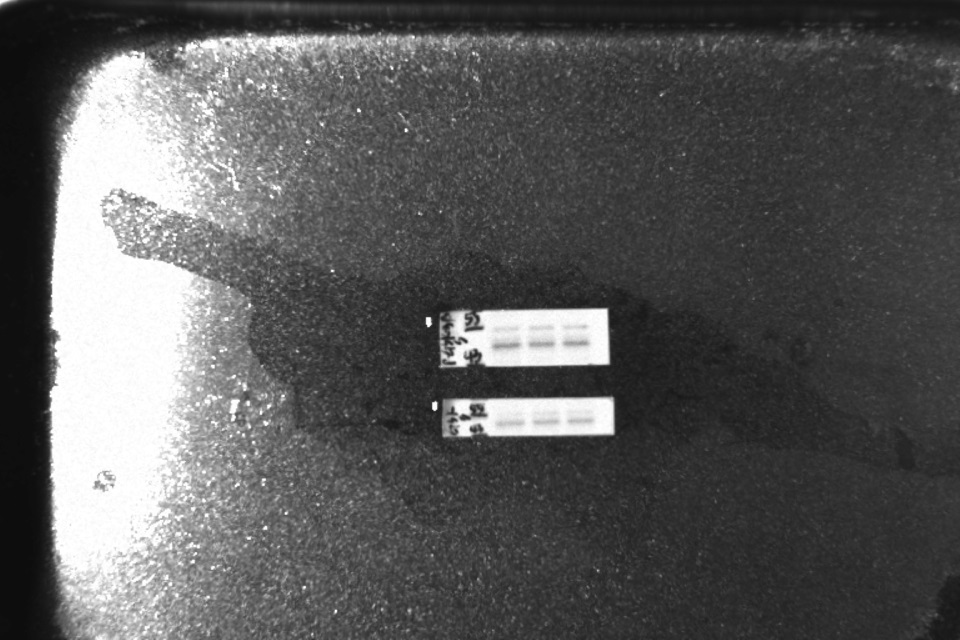

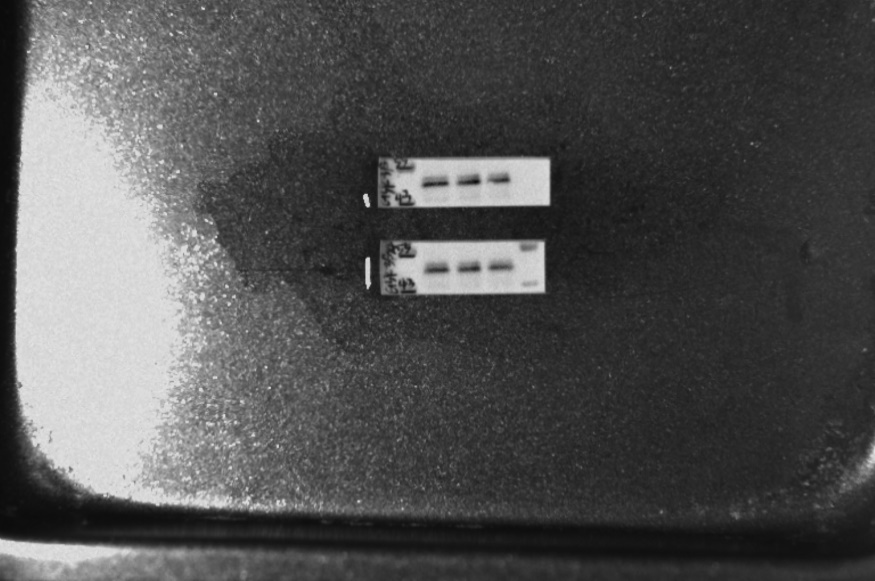

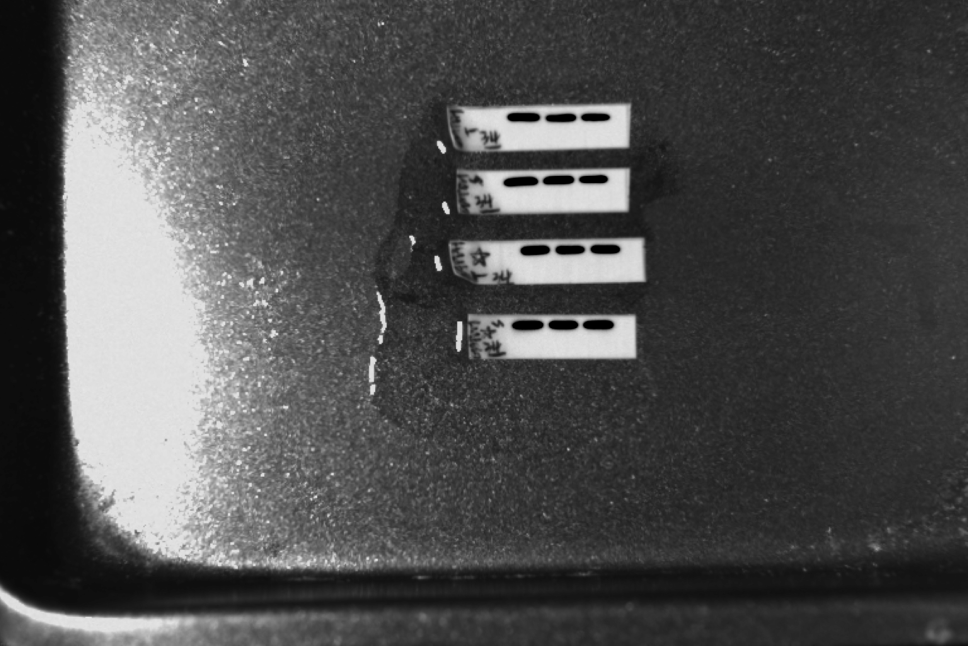

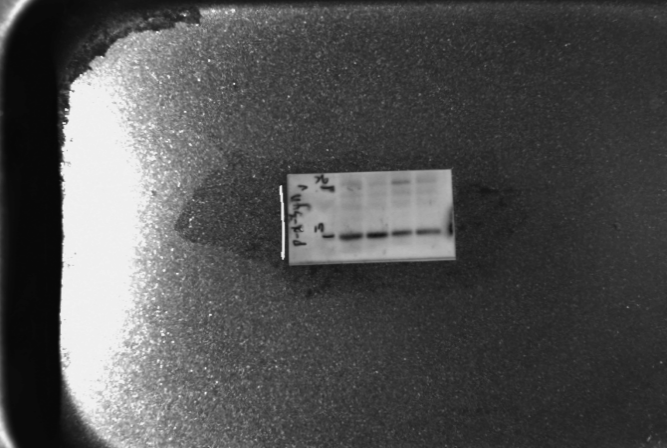

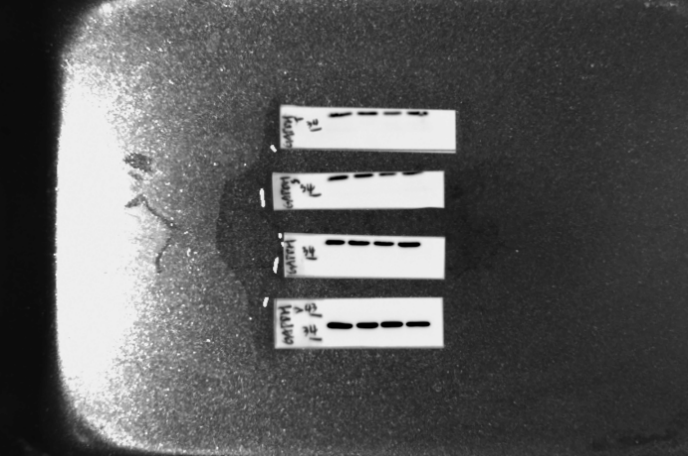

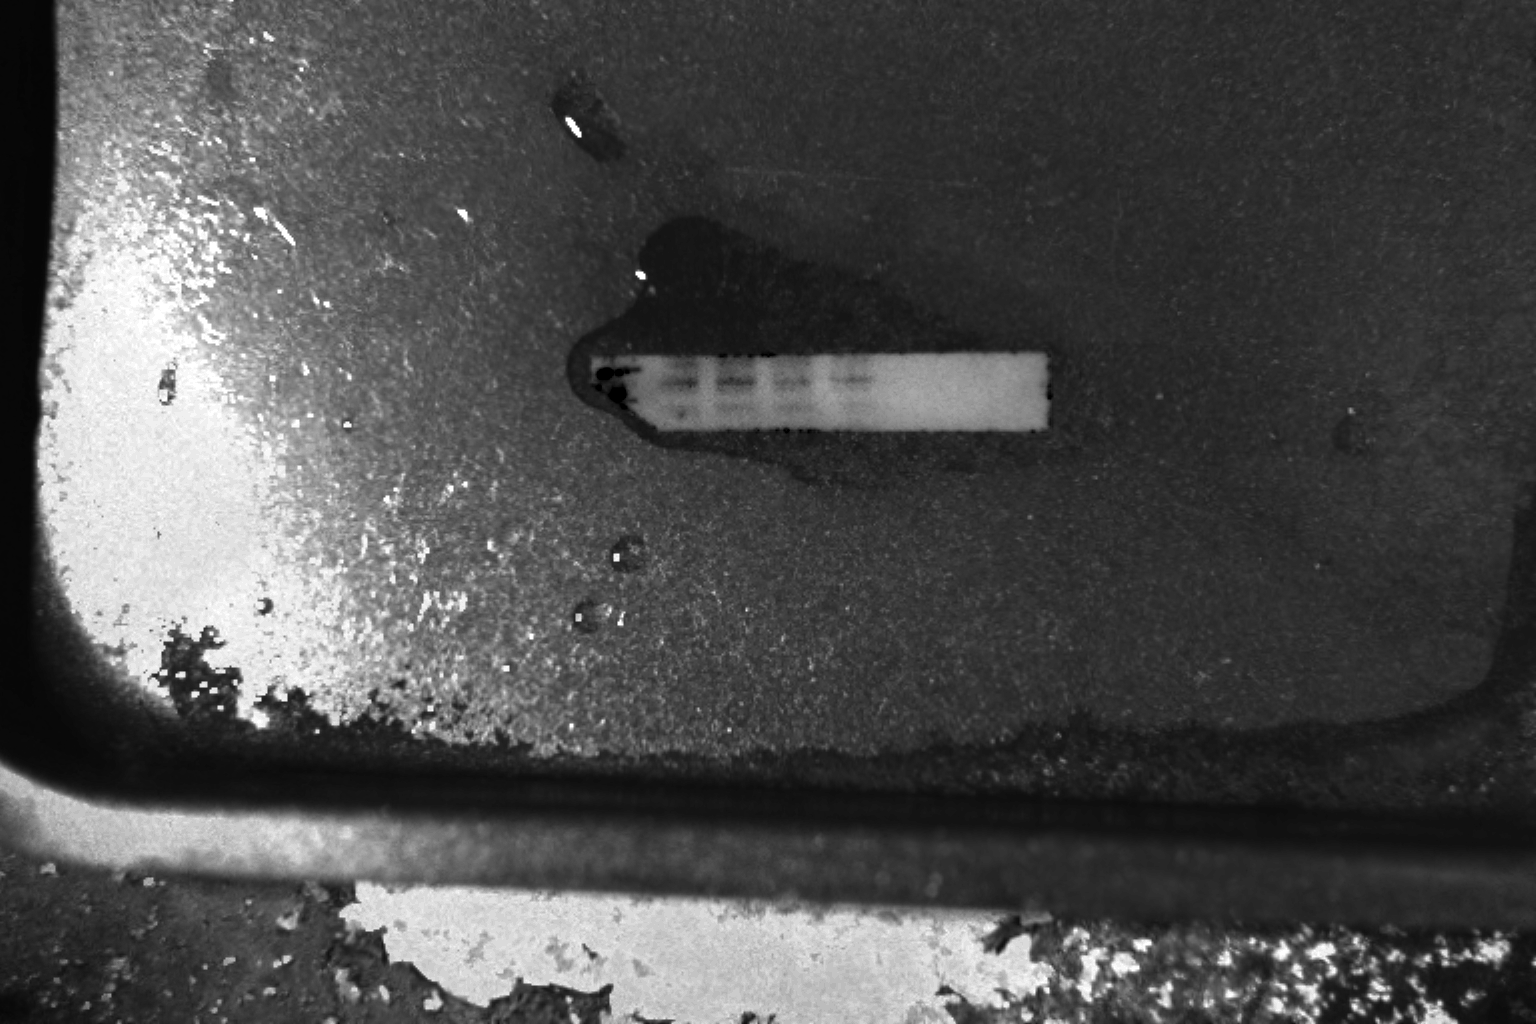

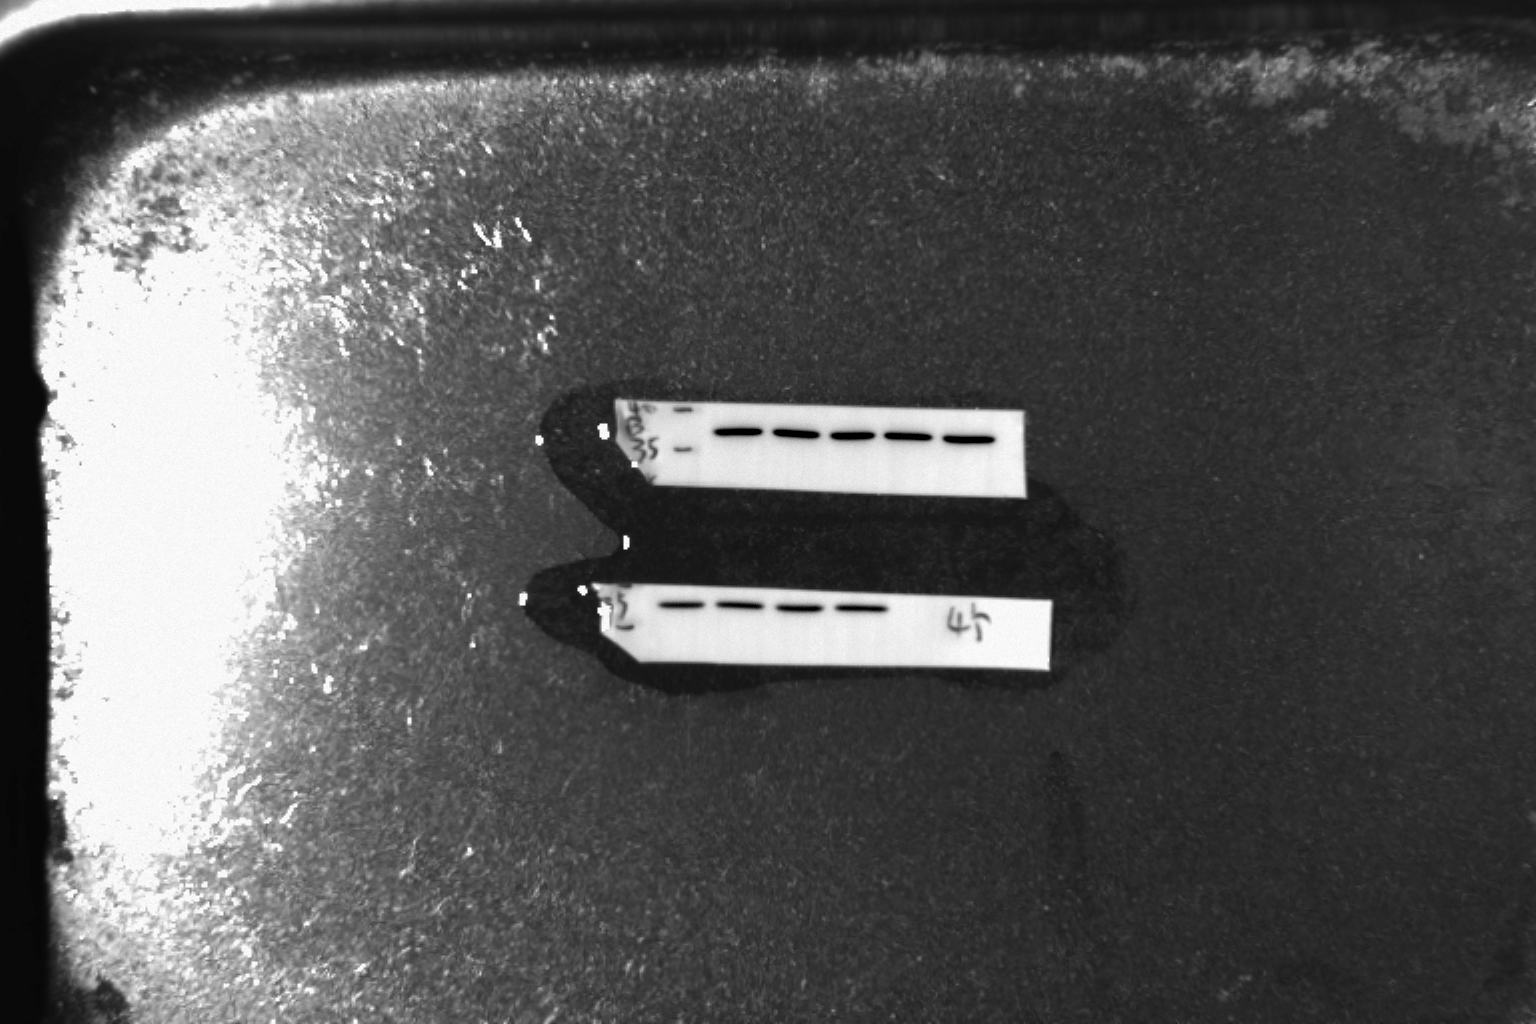


← 60 kDa

← 37 kDa

Figure 4 (A)

8-Gingerol (µM)

cleaved-caspase 1 →

ASC →

NLRP3 →

TXNIP →

GAPDH→


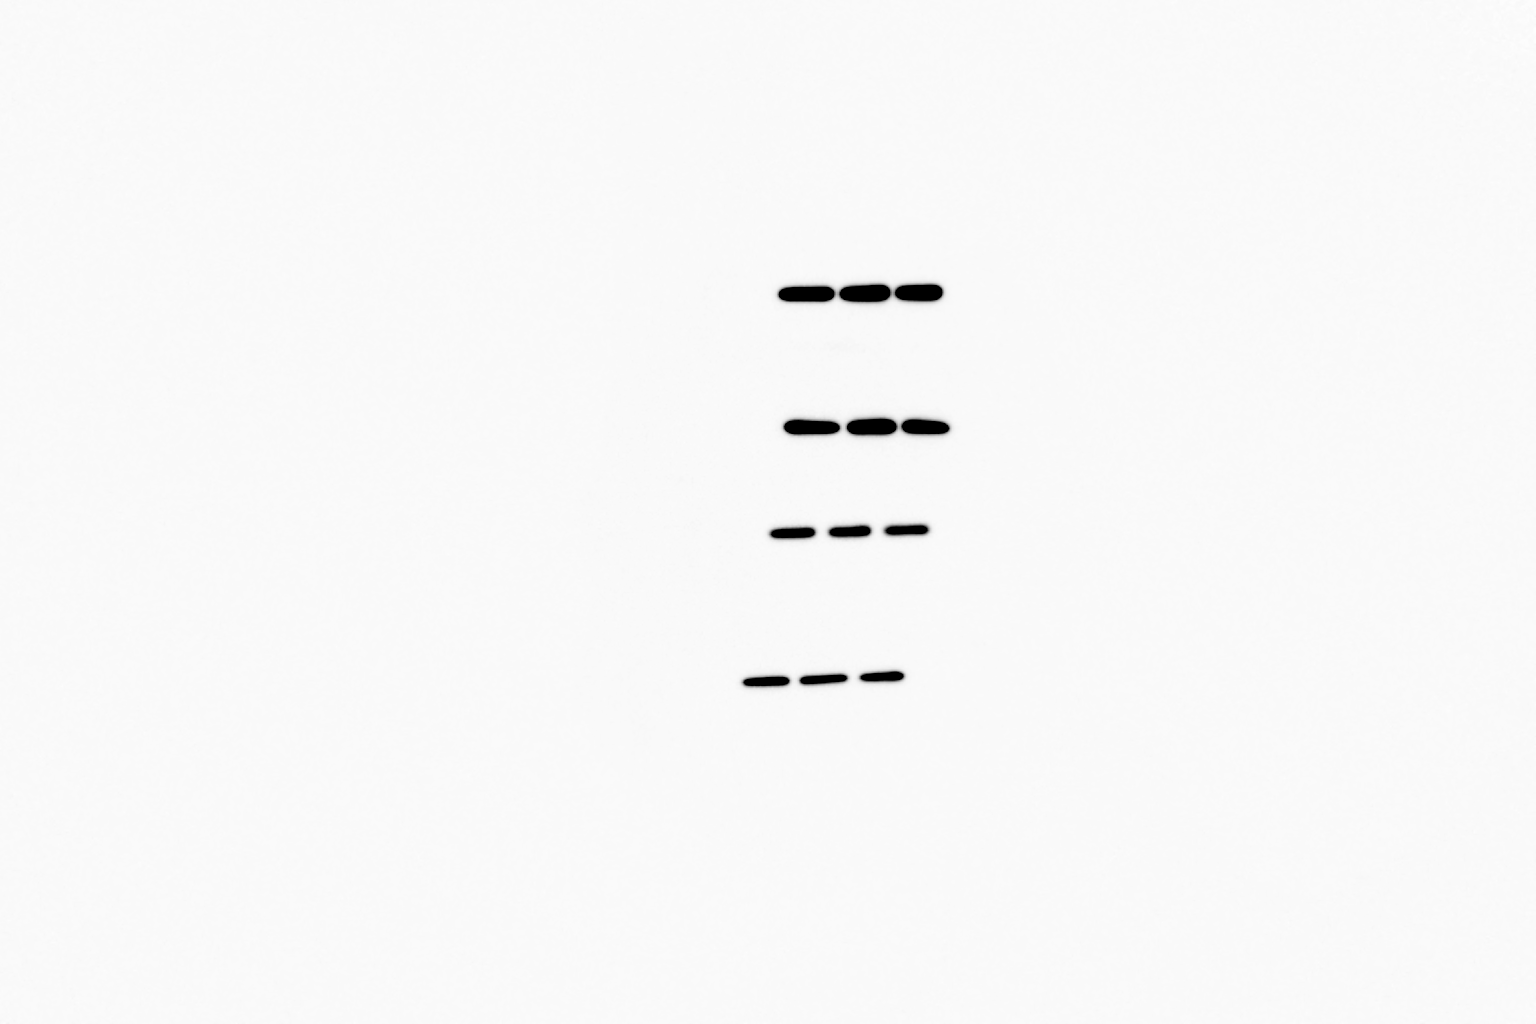


2mM MPP+

C

–

20


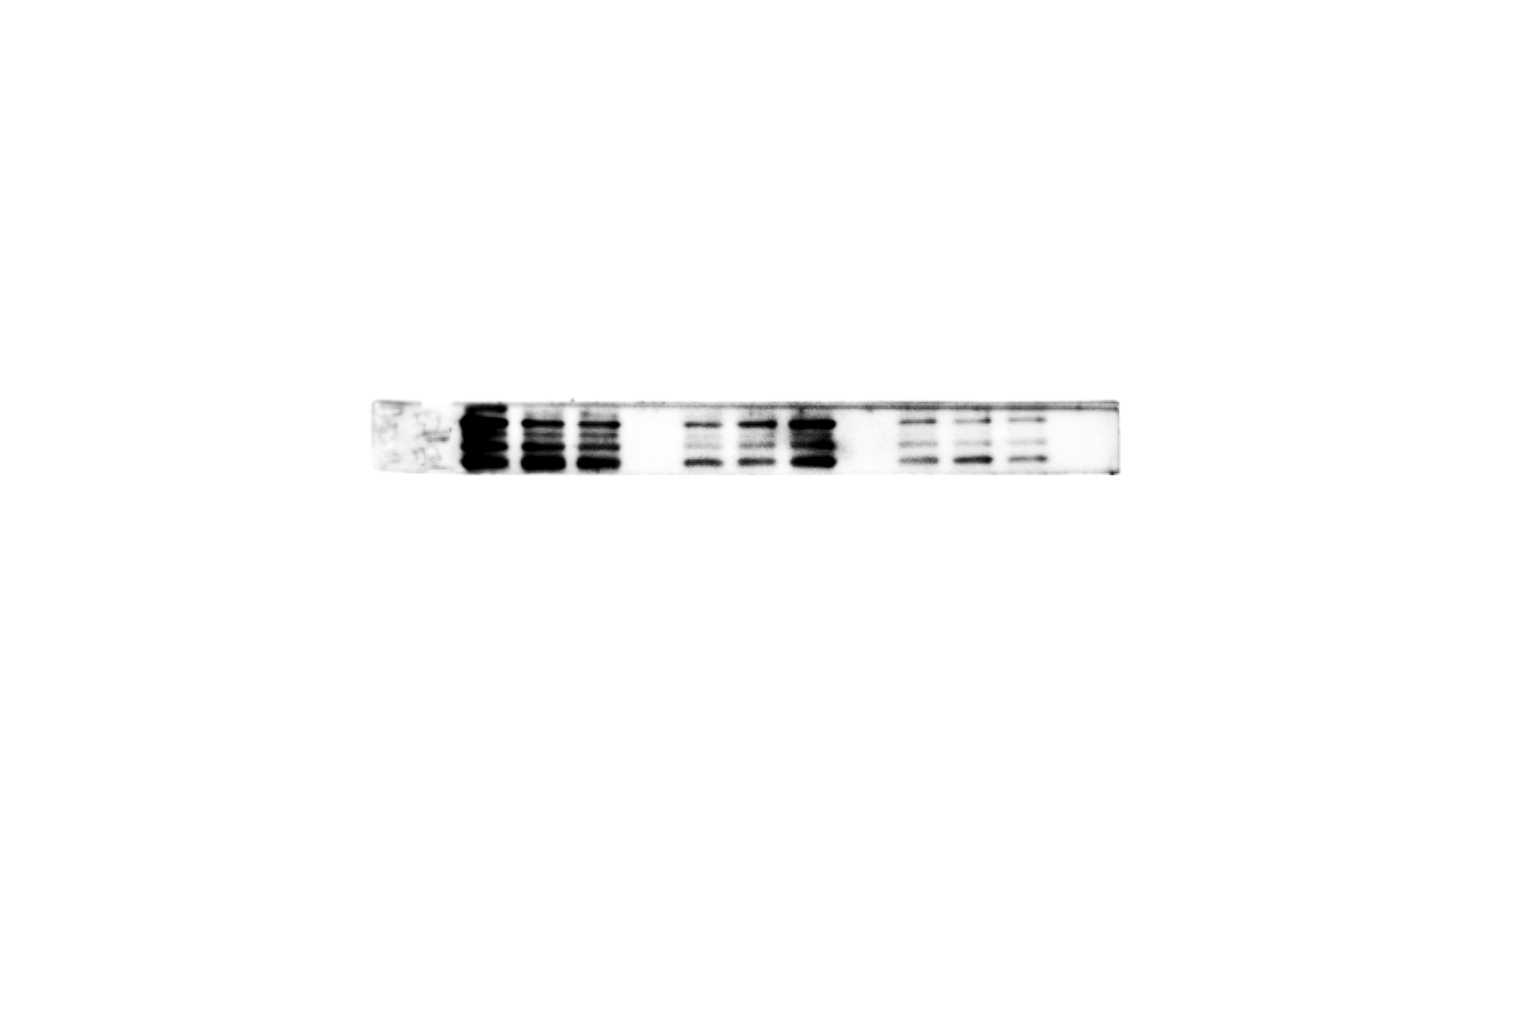

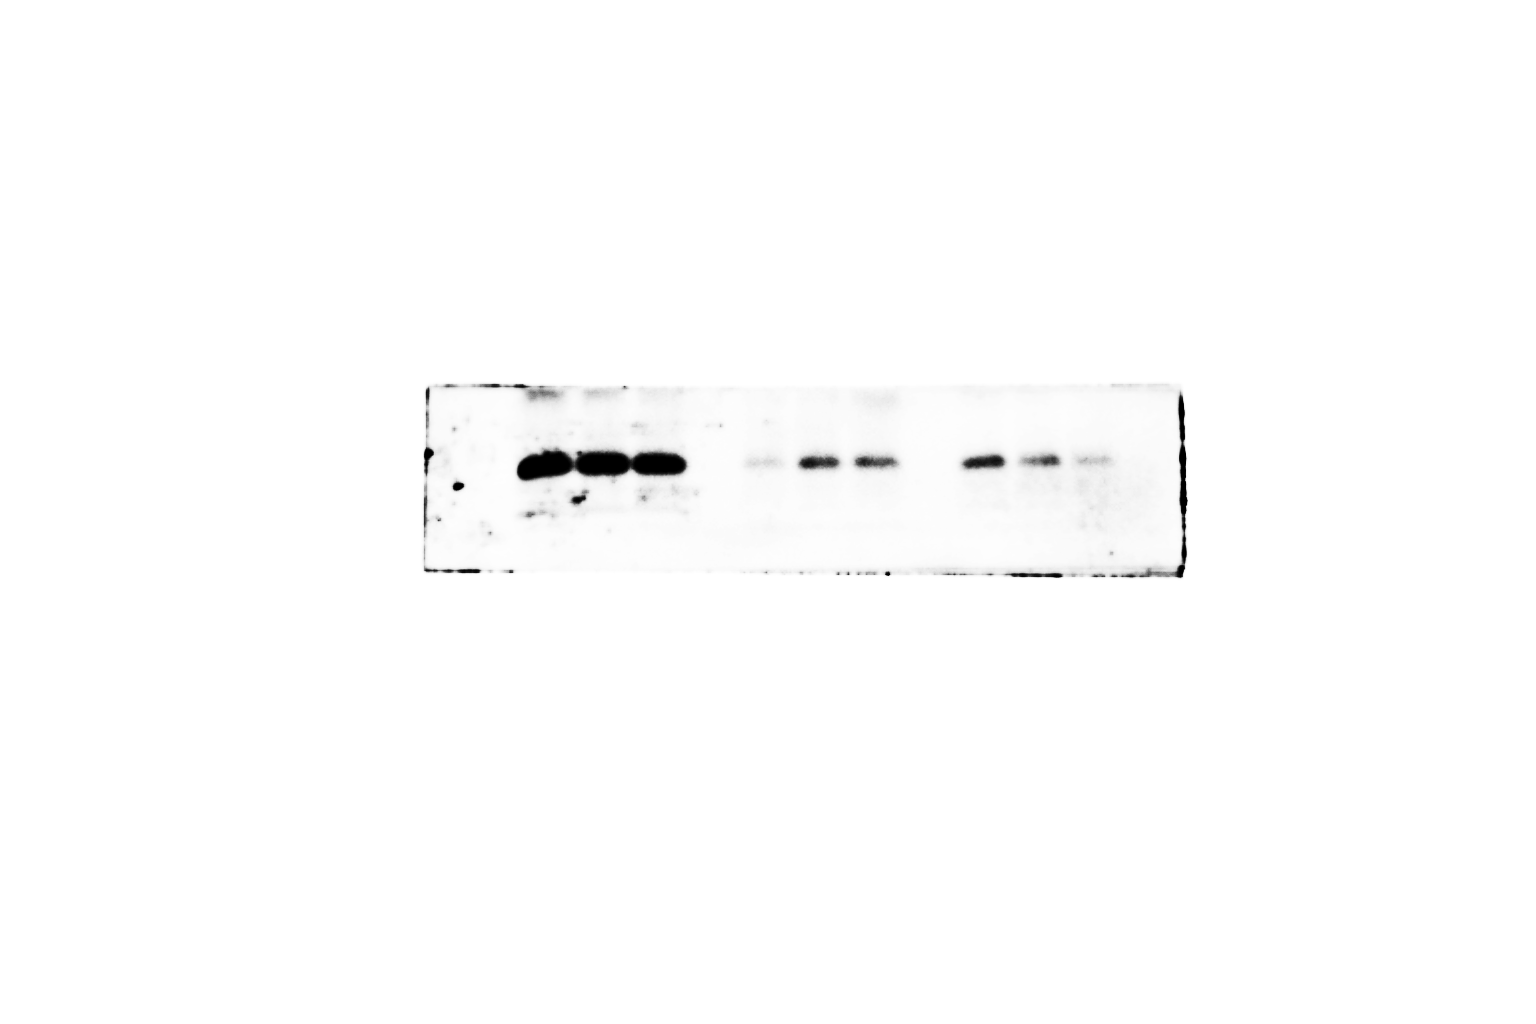

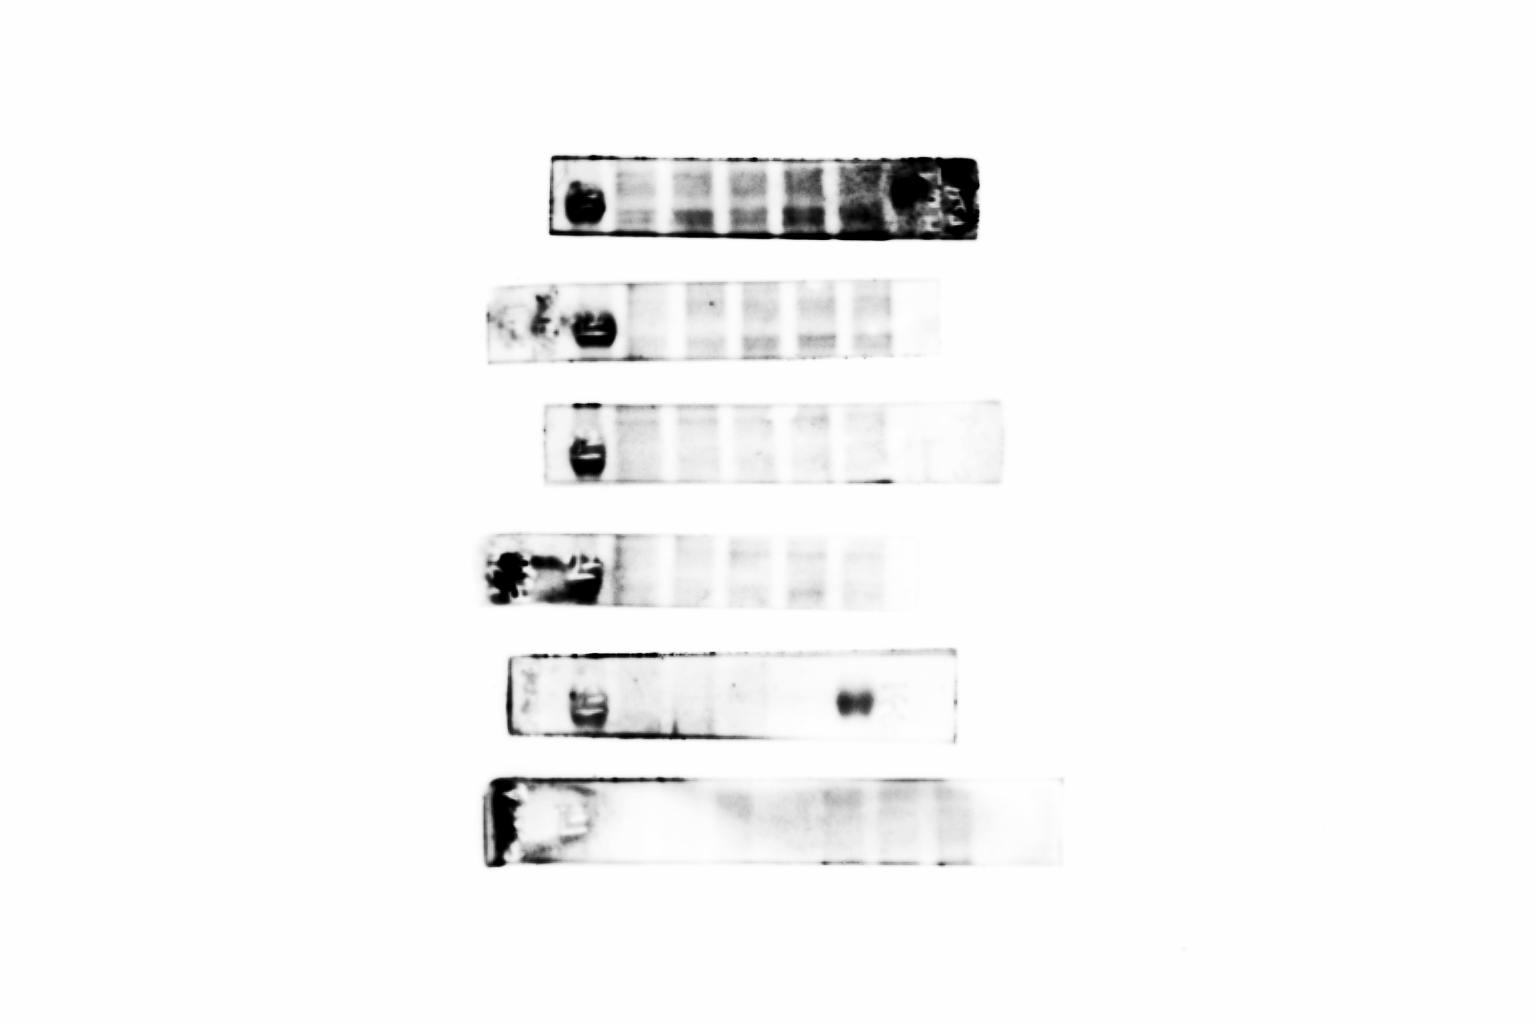


FoxO1 →


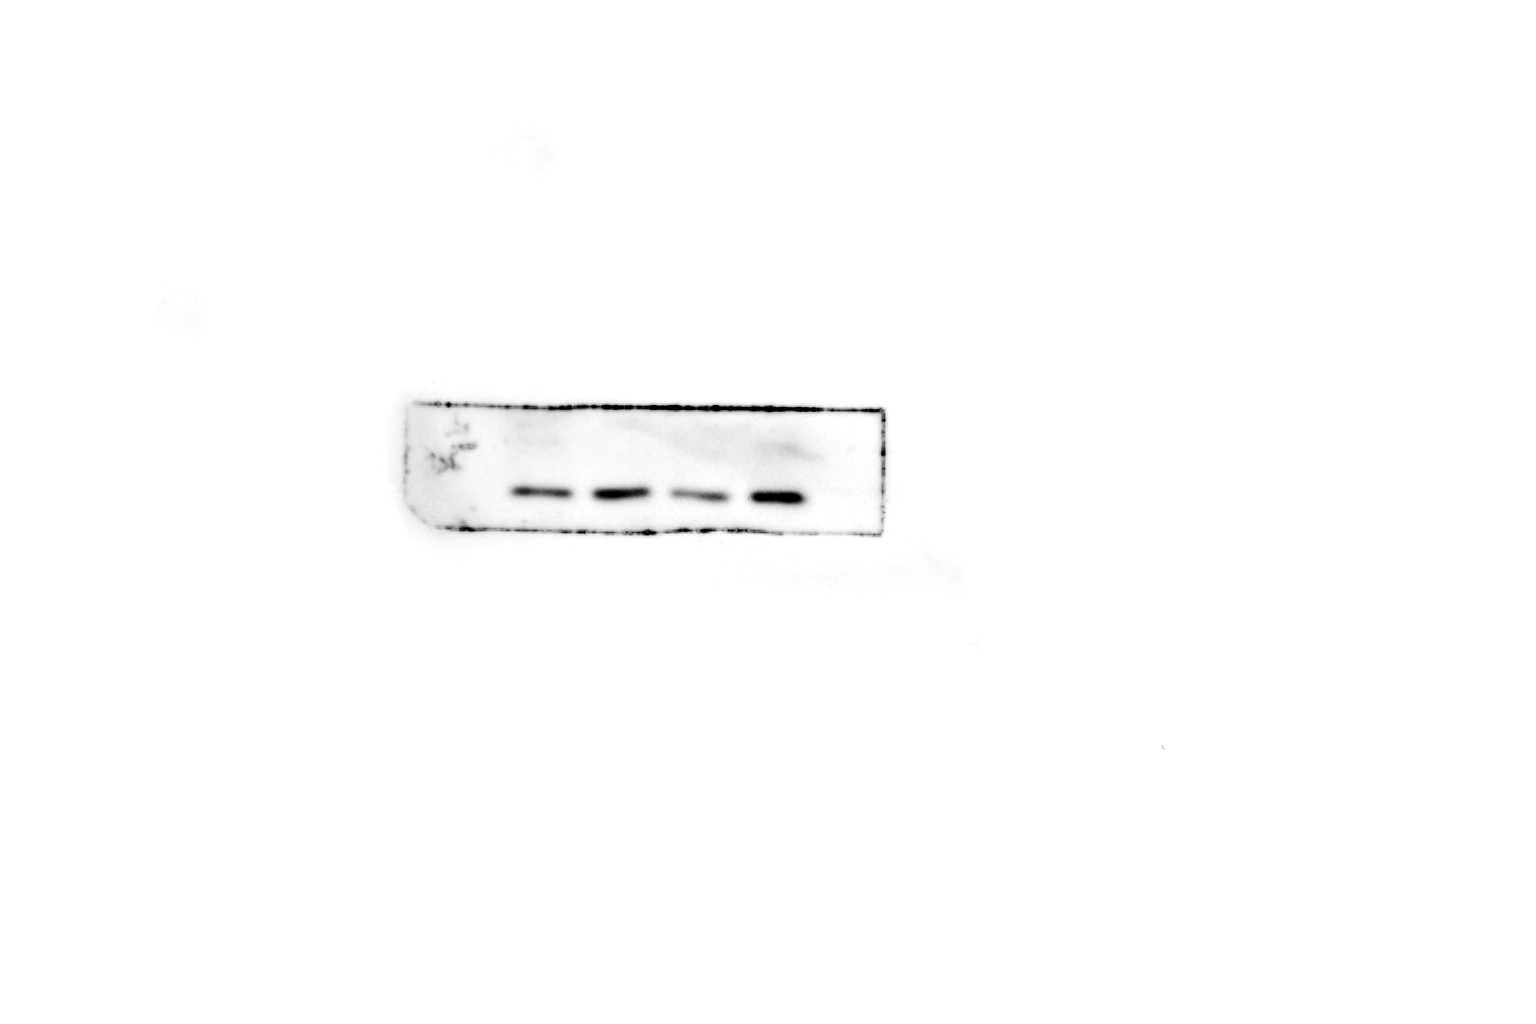


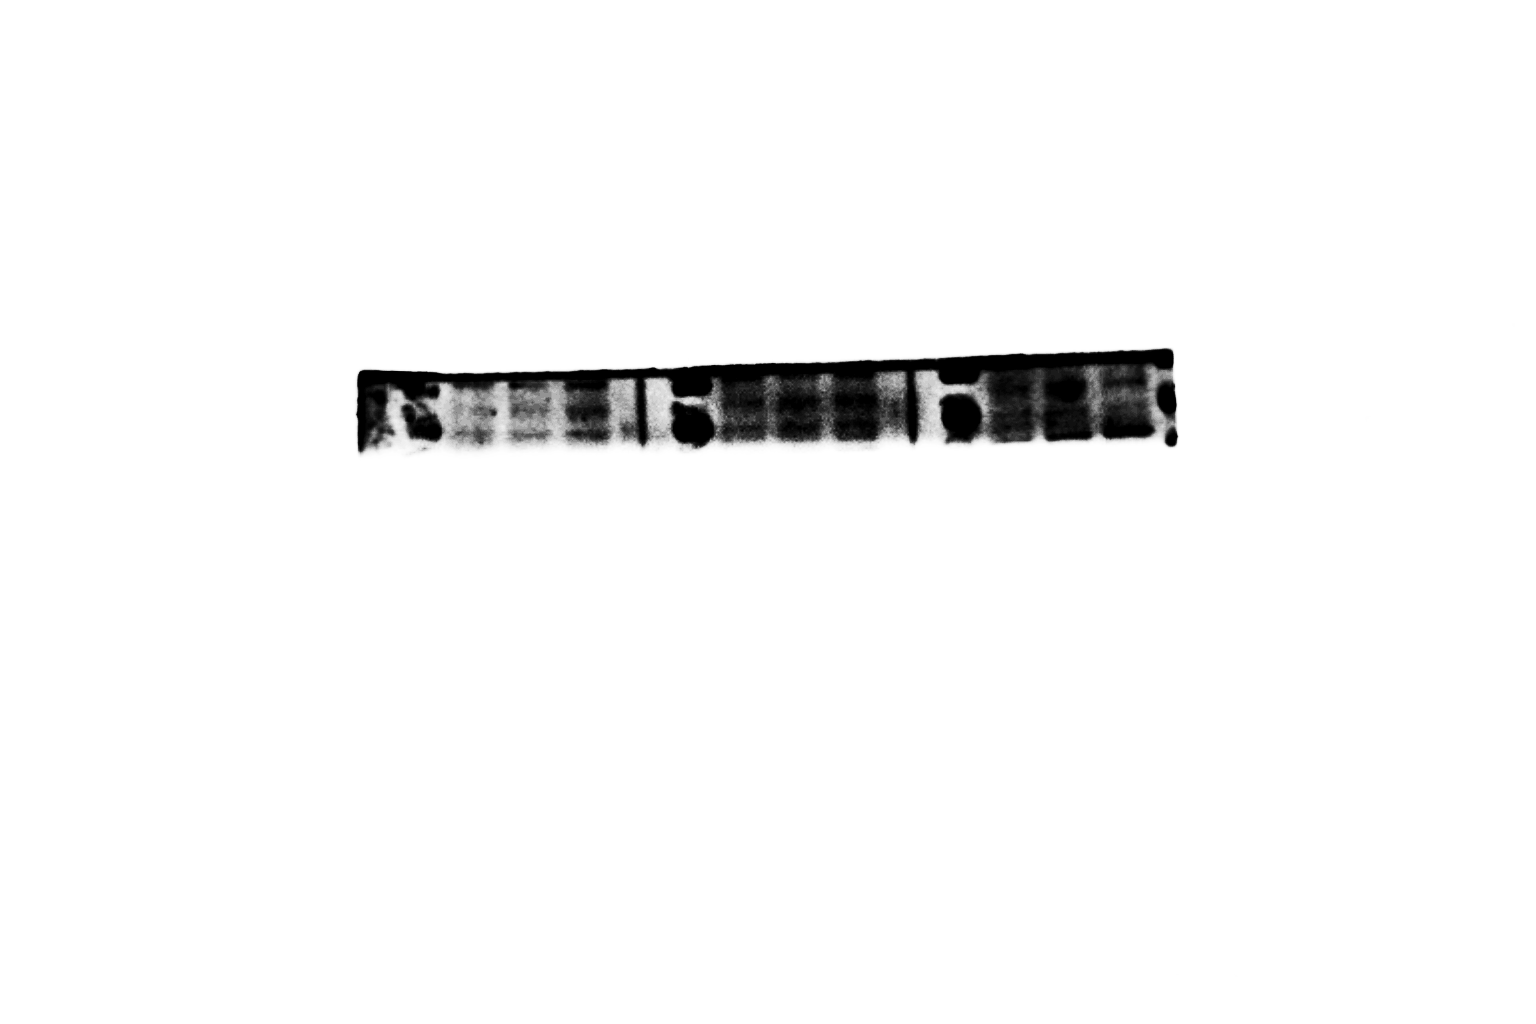

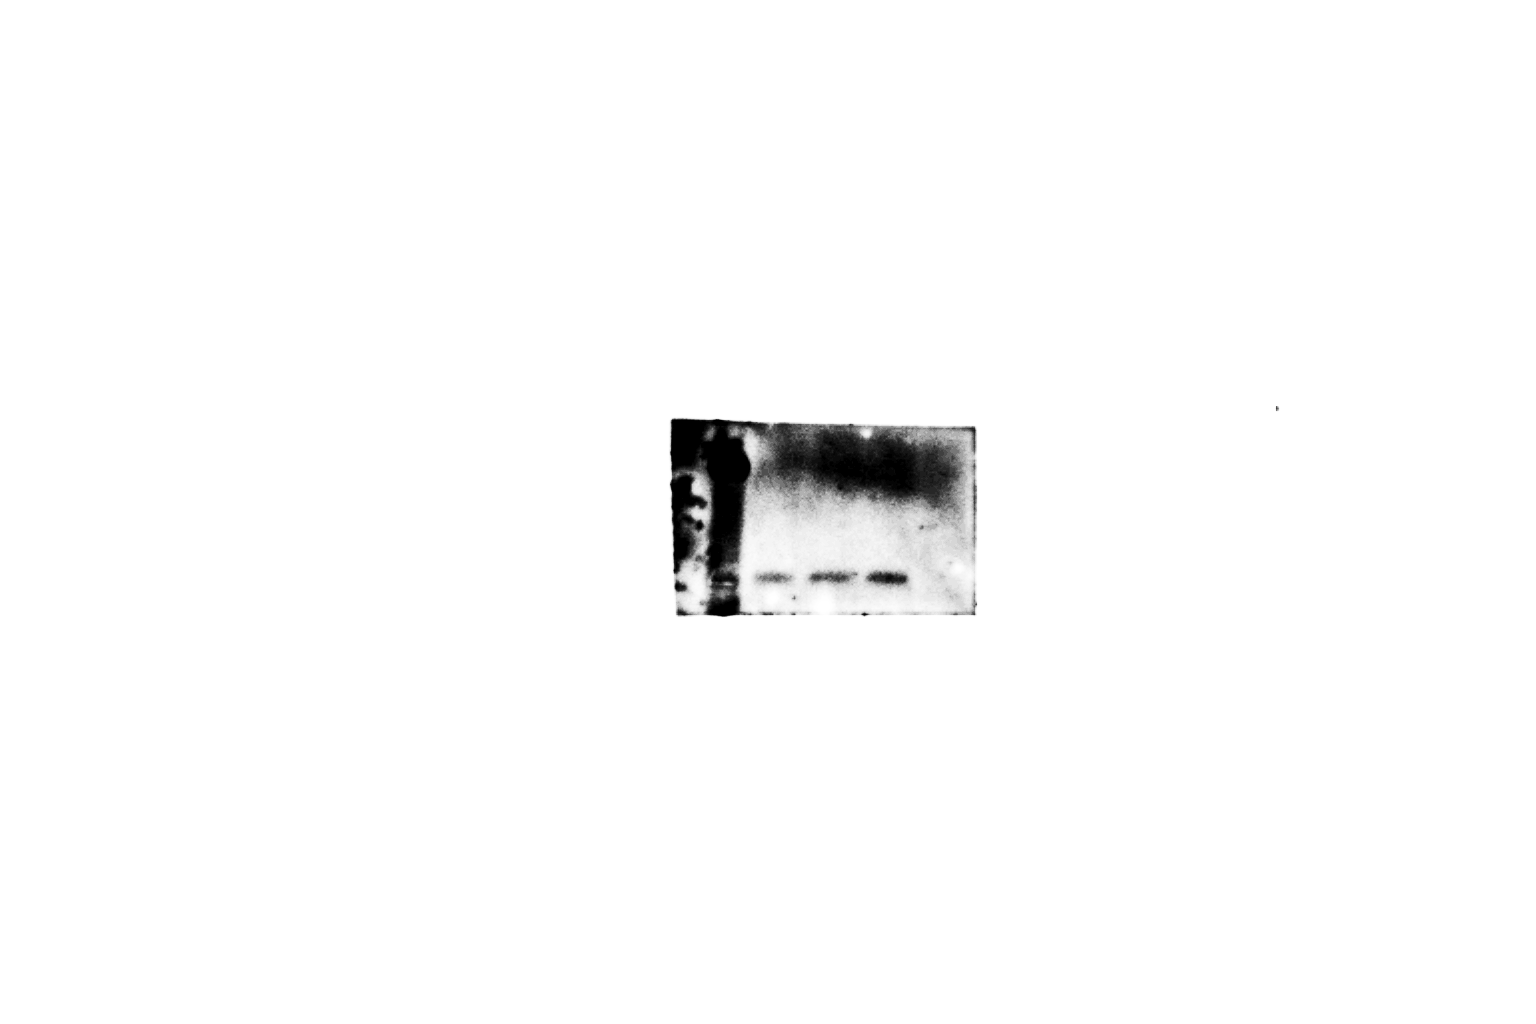

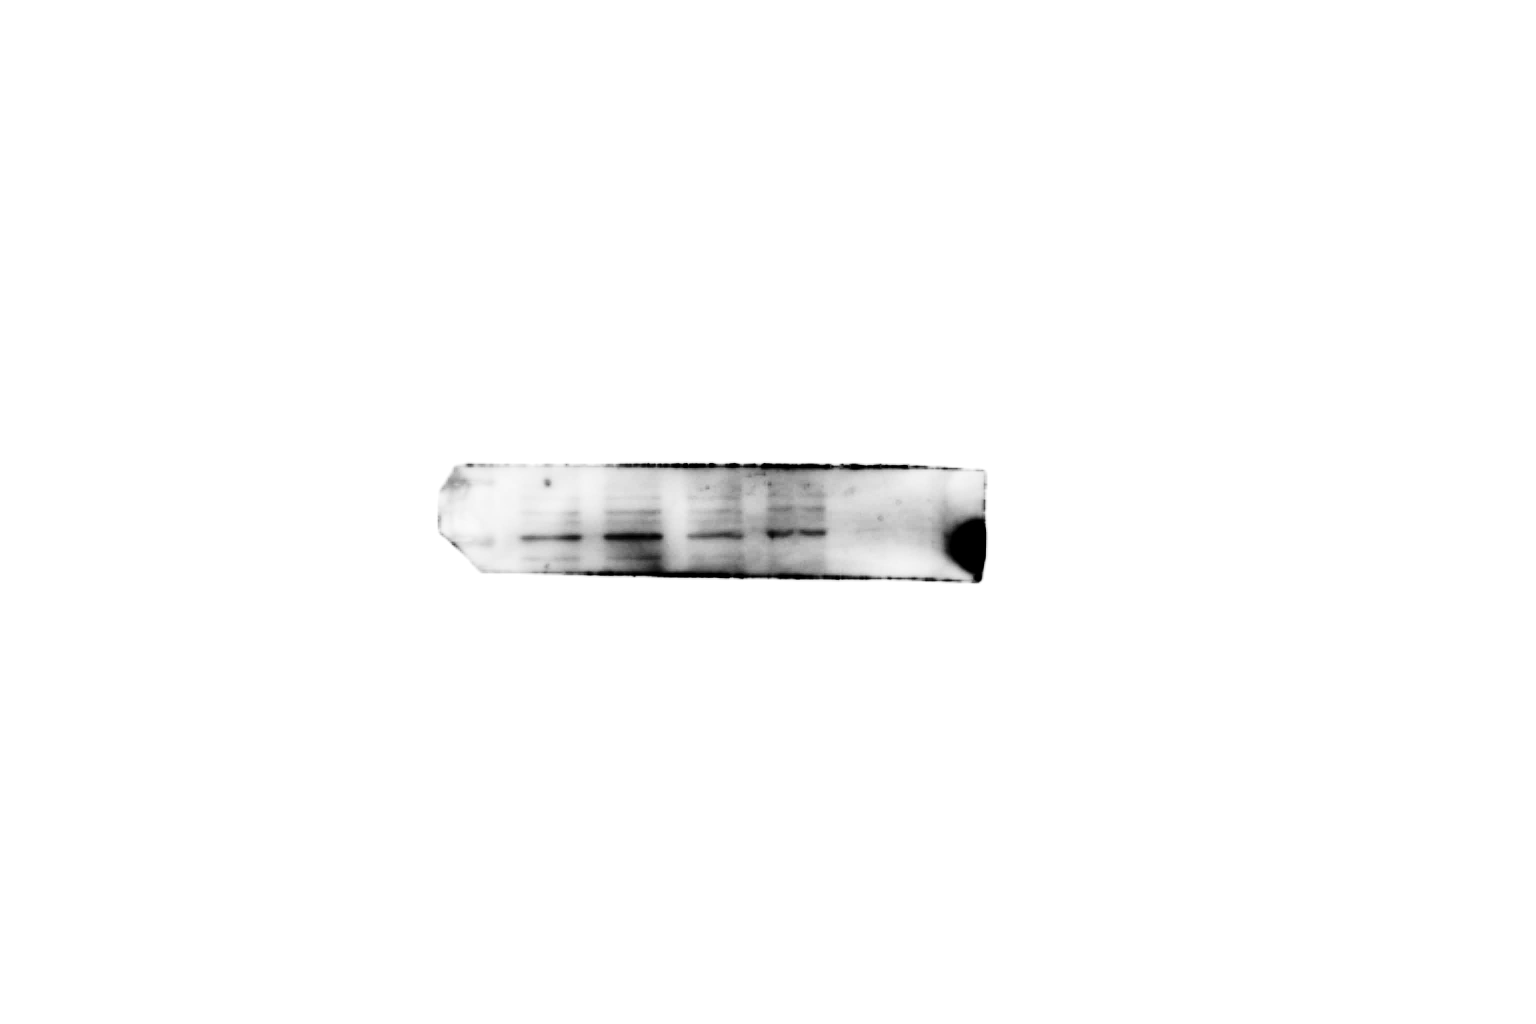


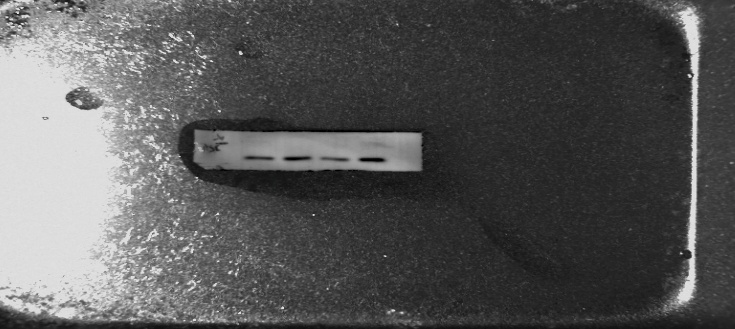

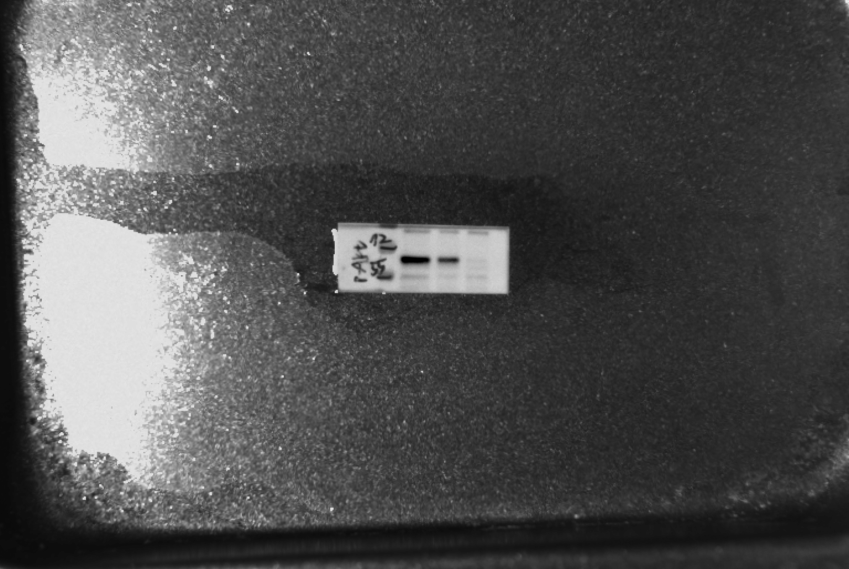

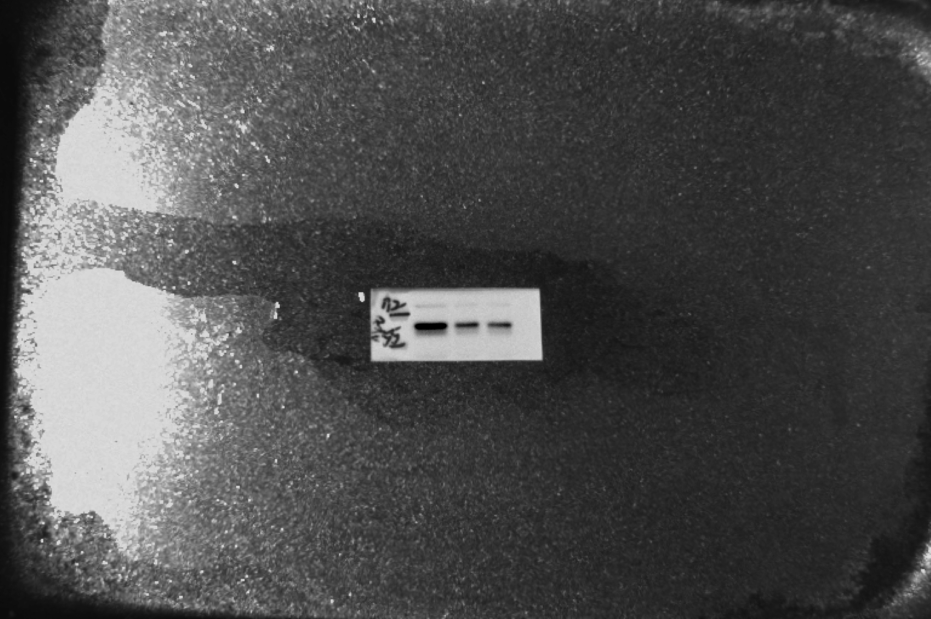

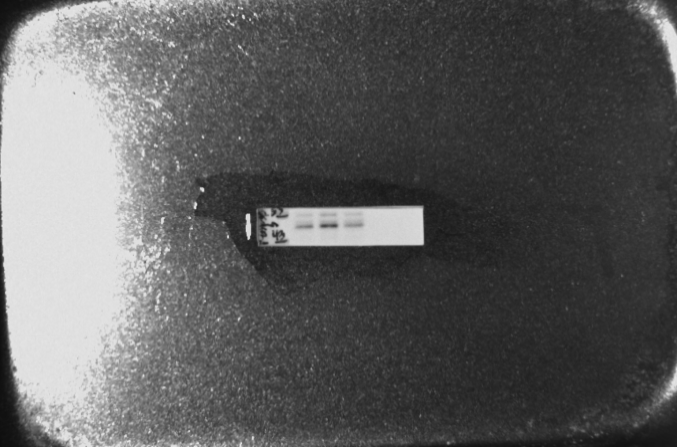

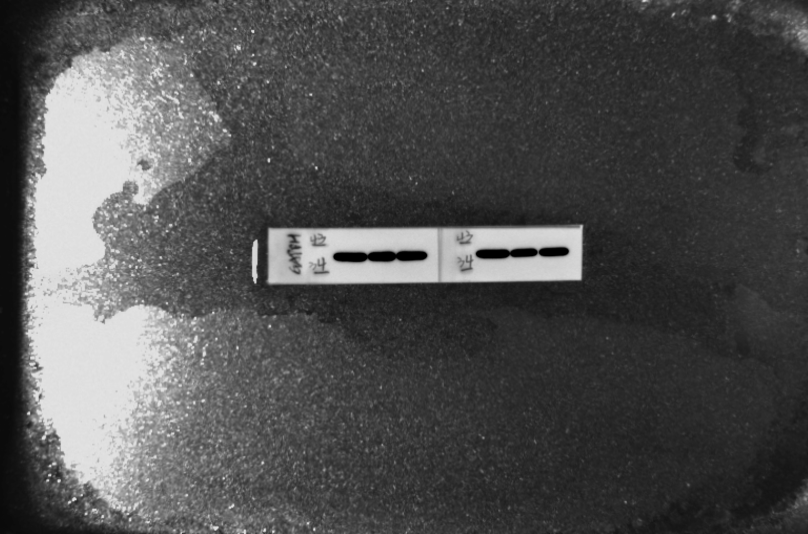

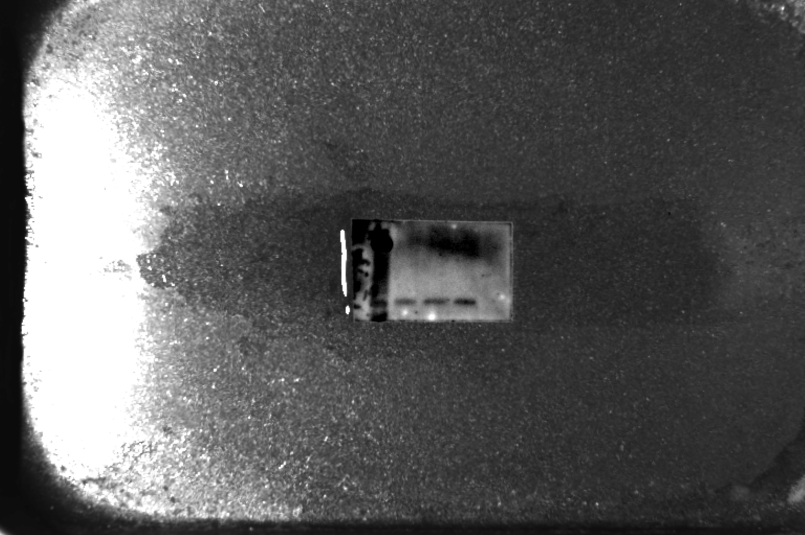

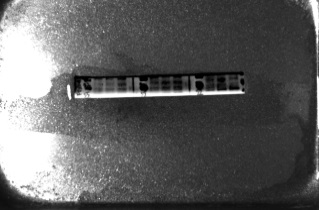

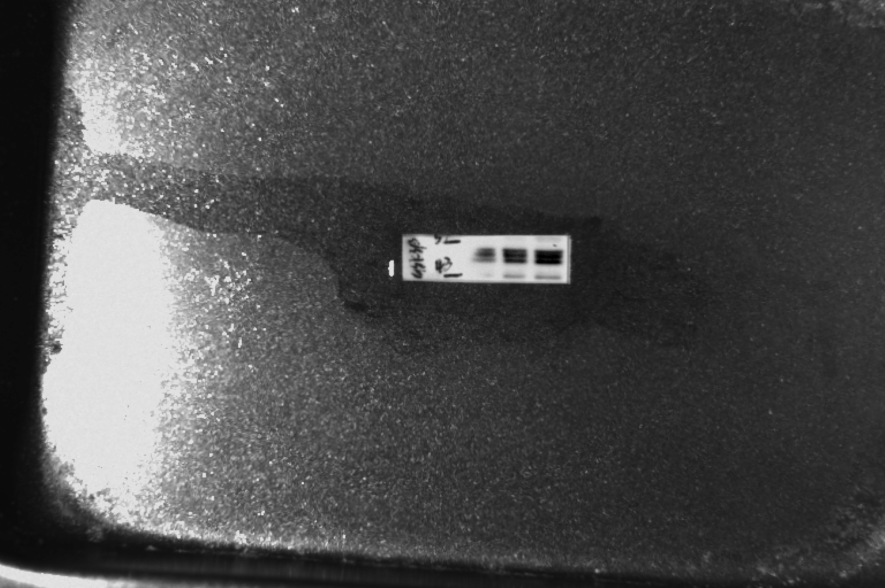

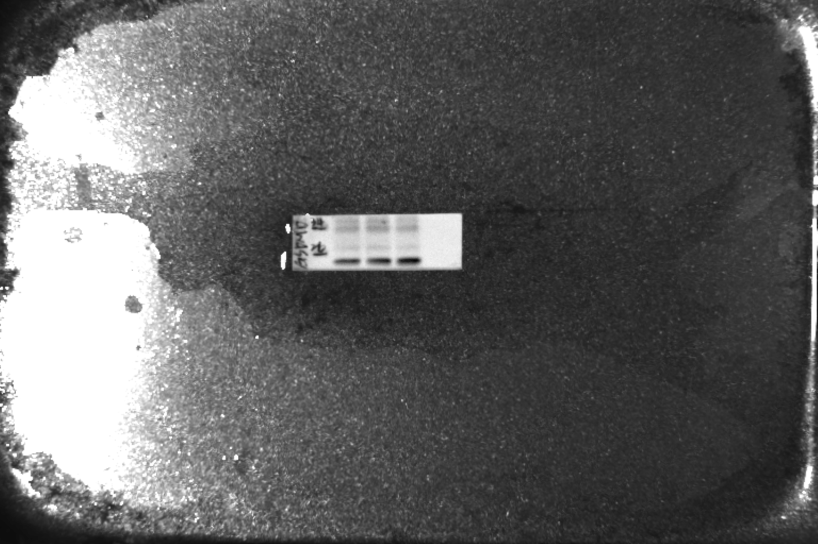

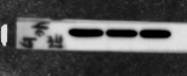

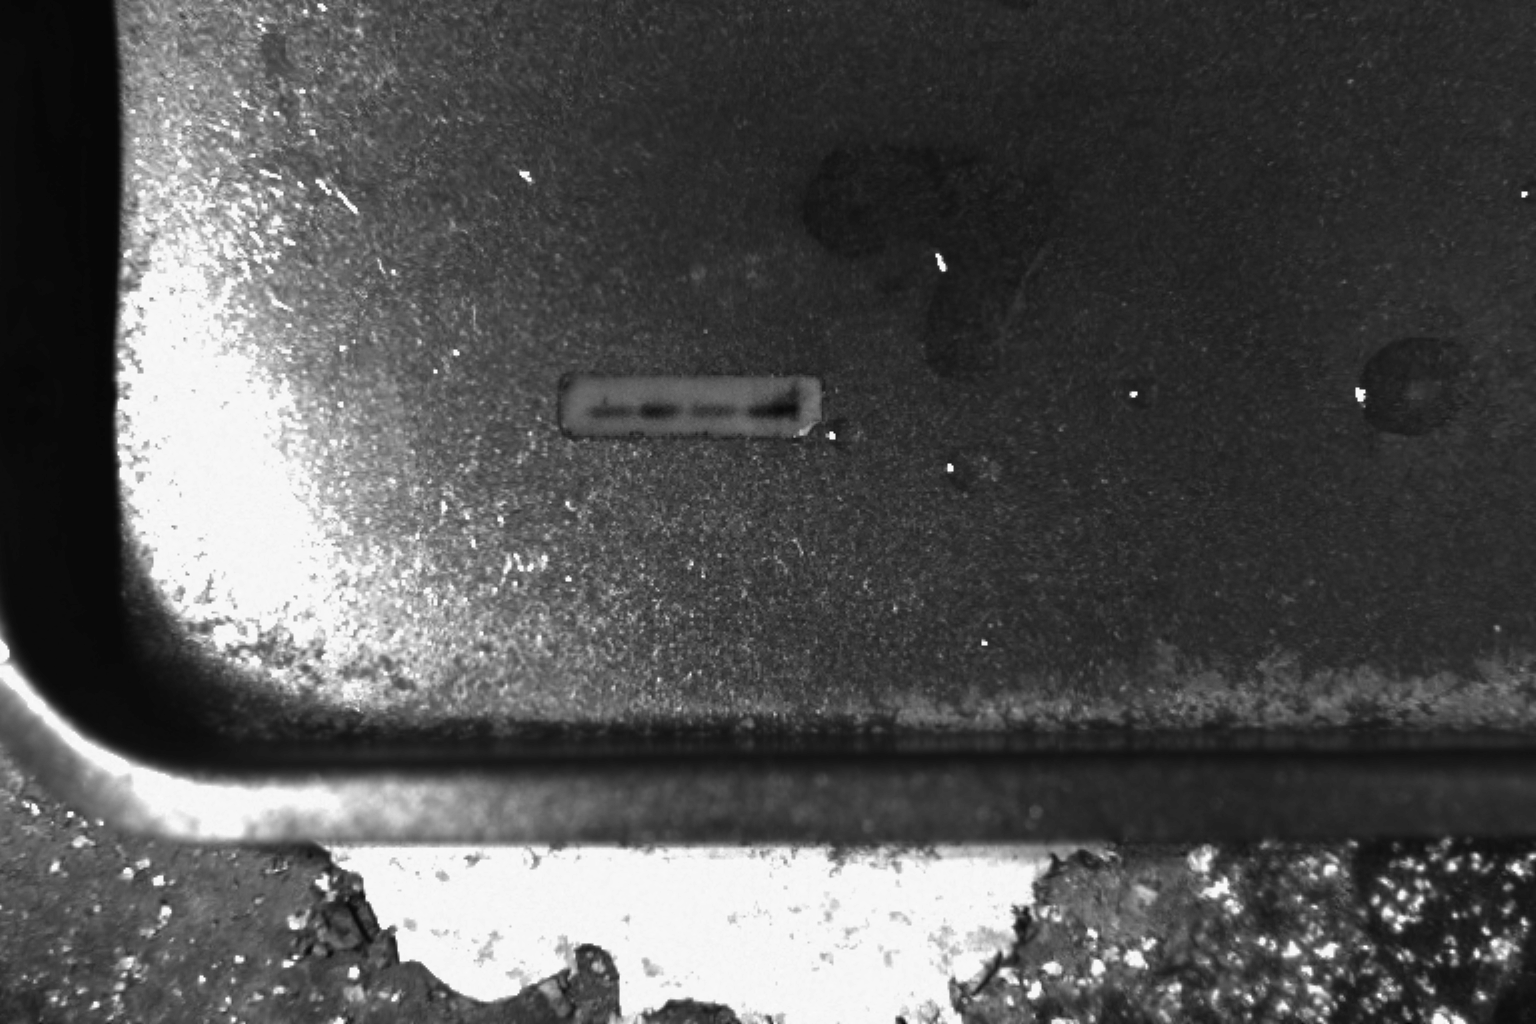

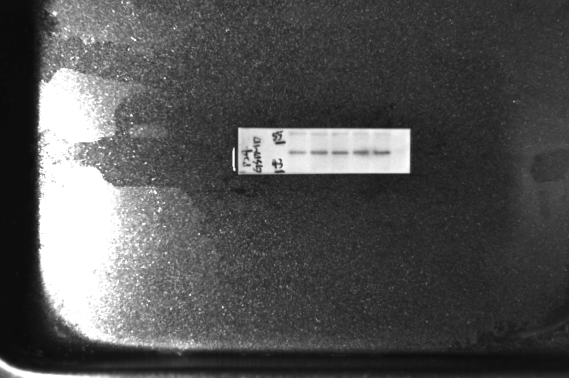

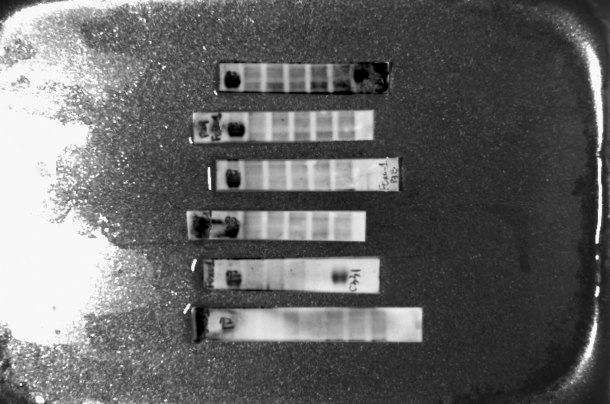

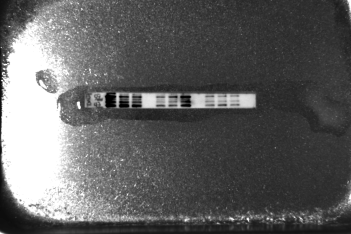

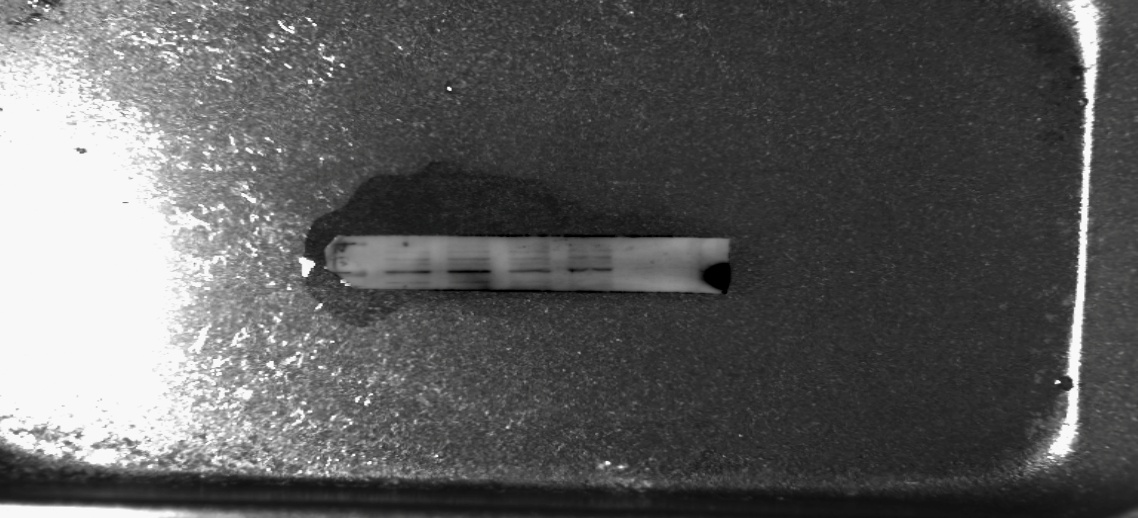

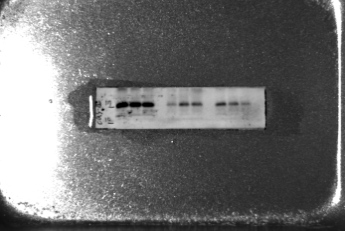

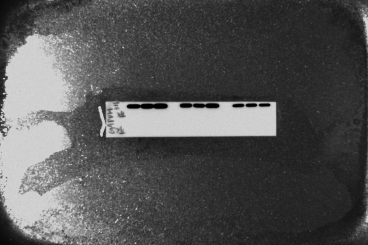


← 47 kDa

← 47 kDa

← 70 kDa

← 18 kDa

← 37 kDa

← 60 kDa

Figure 6 (A)

← 60 kDa

Ser473p-Akt →

Ser129p-α-synuclein →

GAPDH →

Akt →

Ser9p-GSK-3β →

GSK-3β →


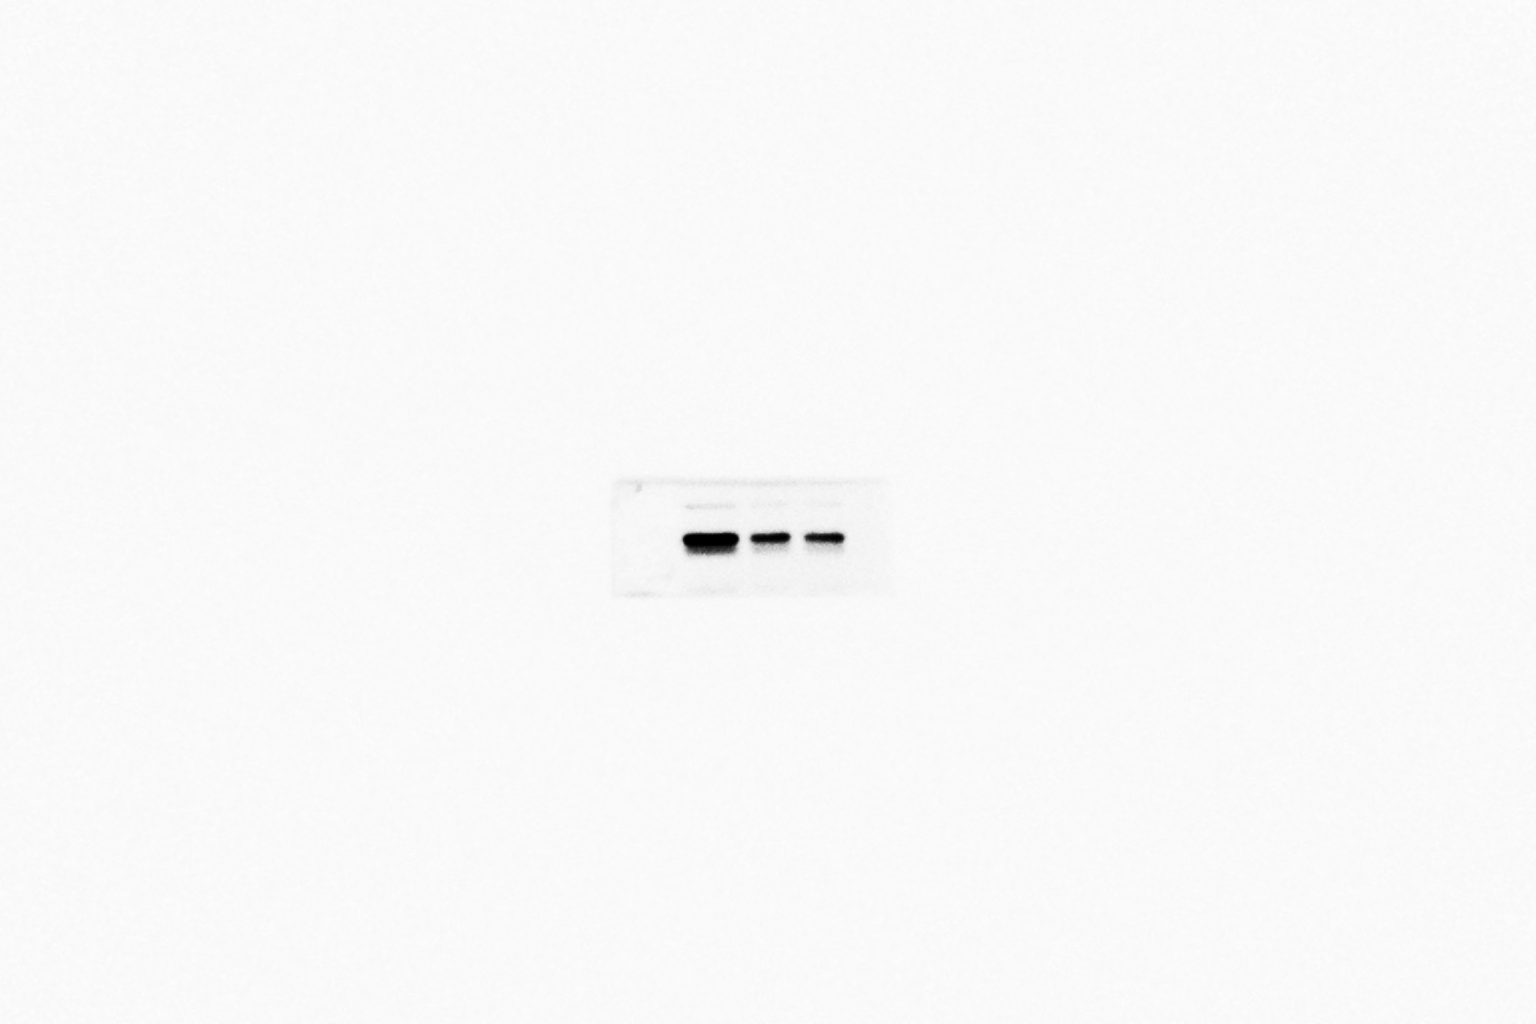

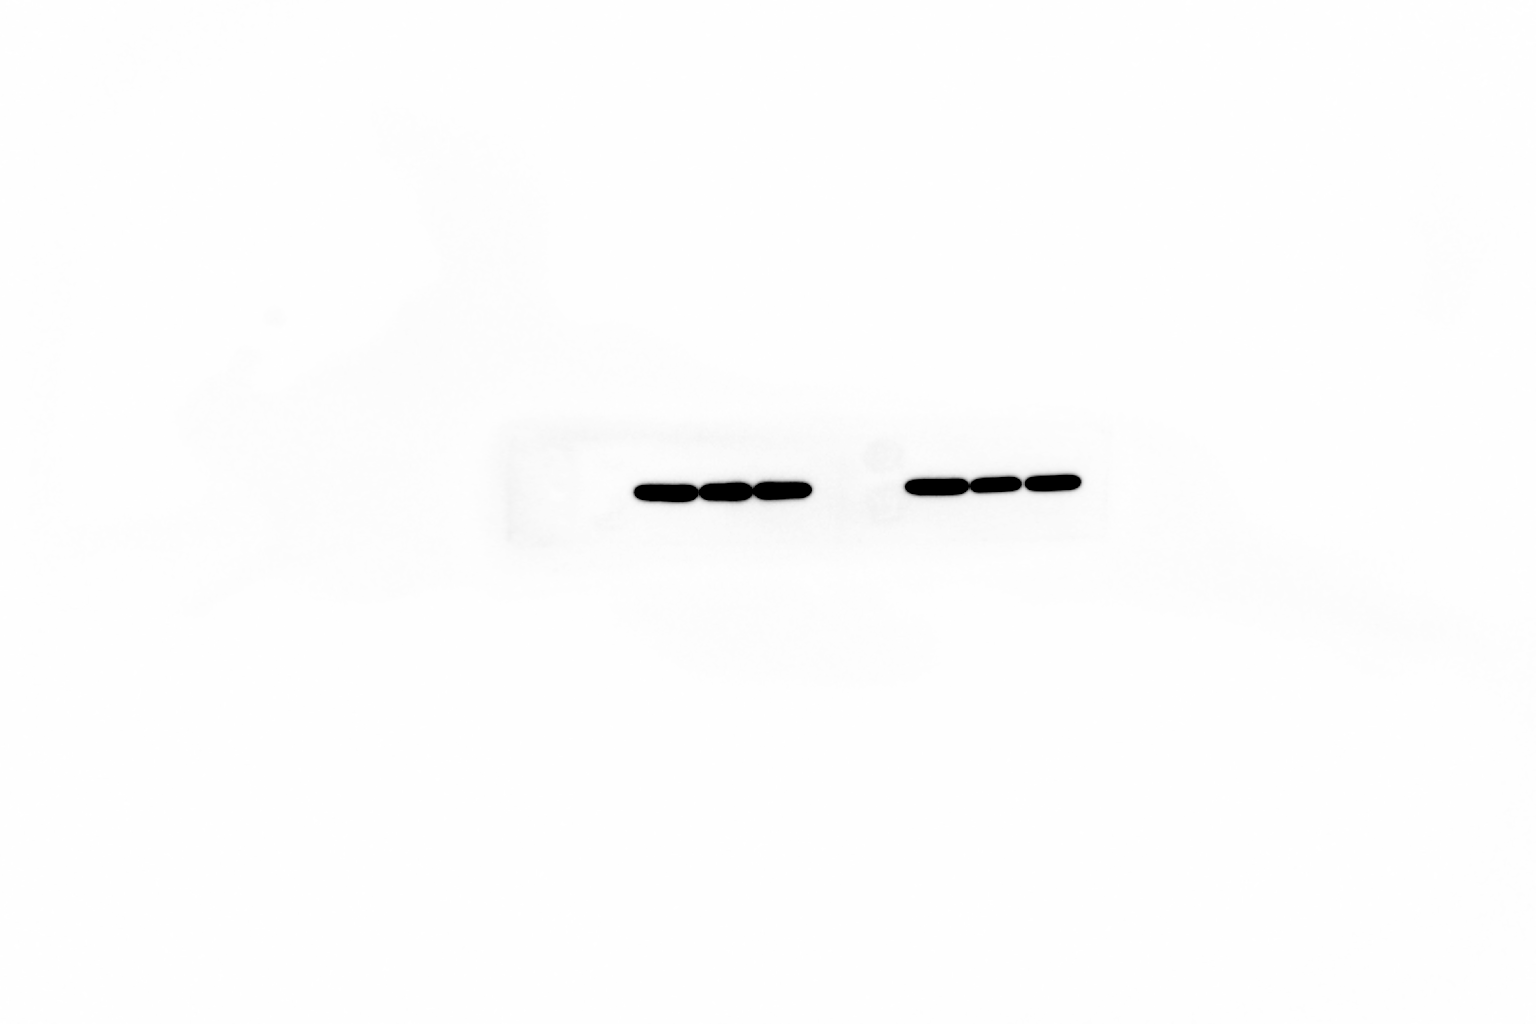

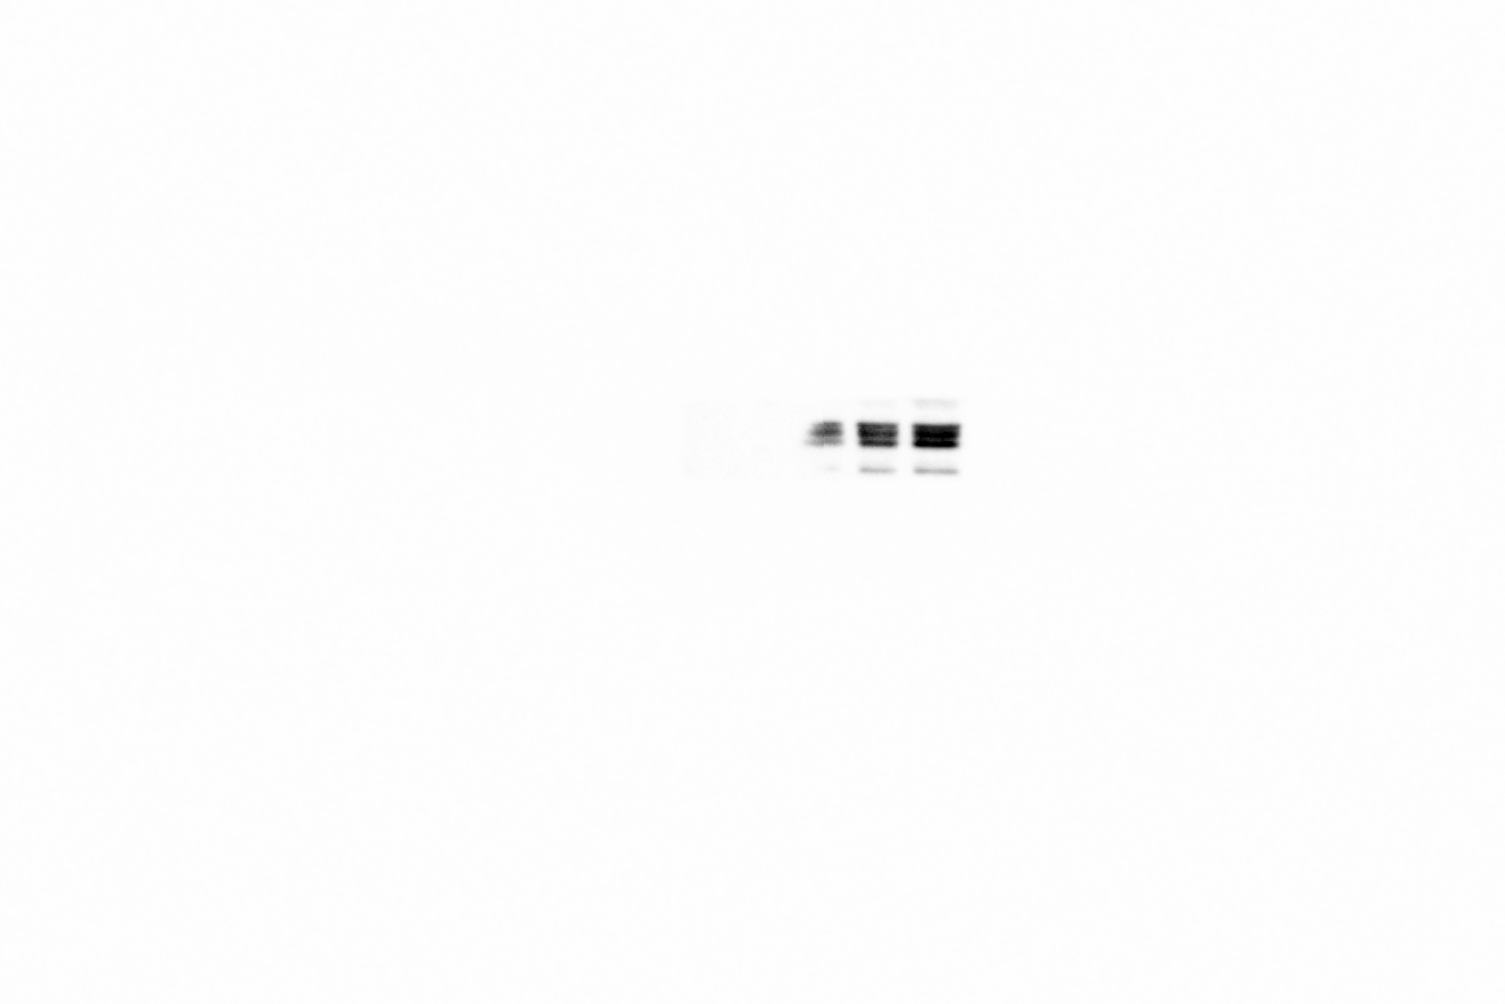

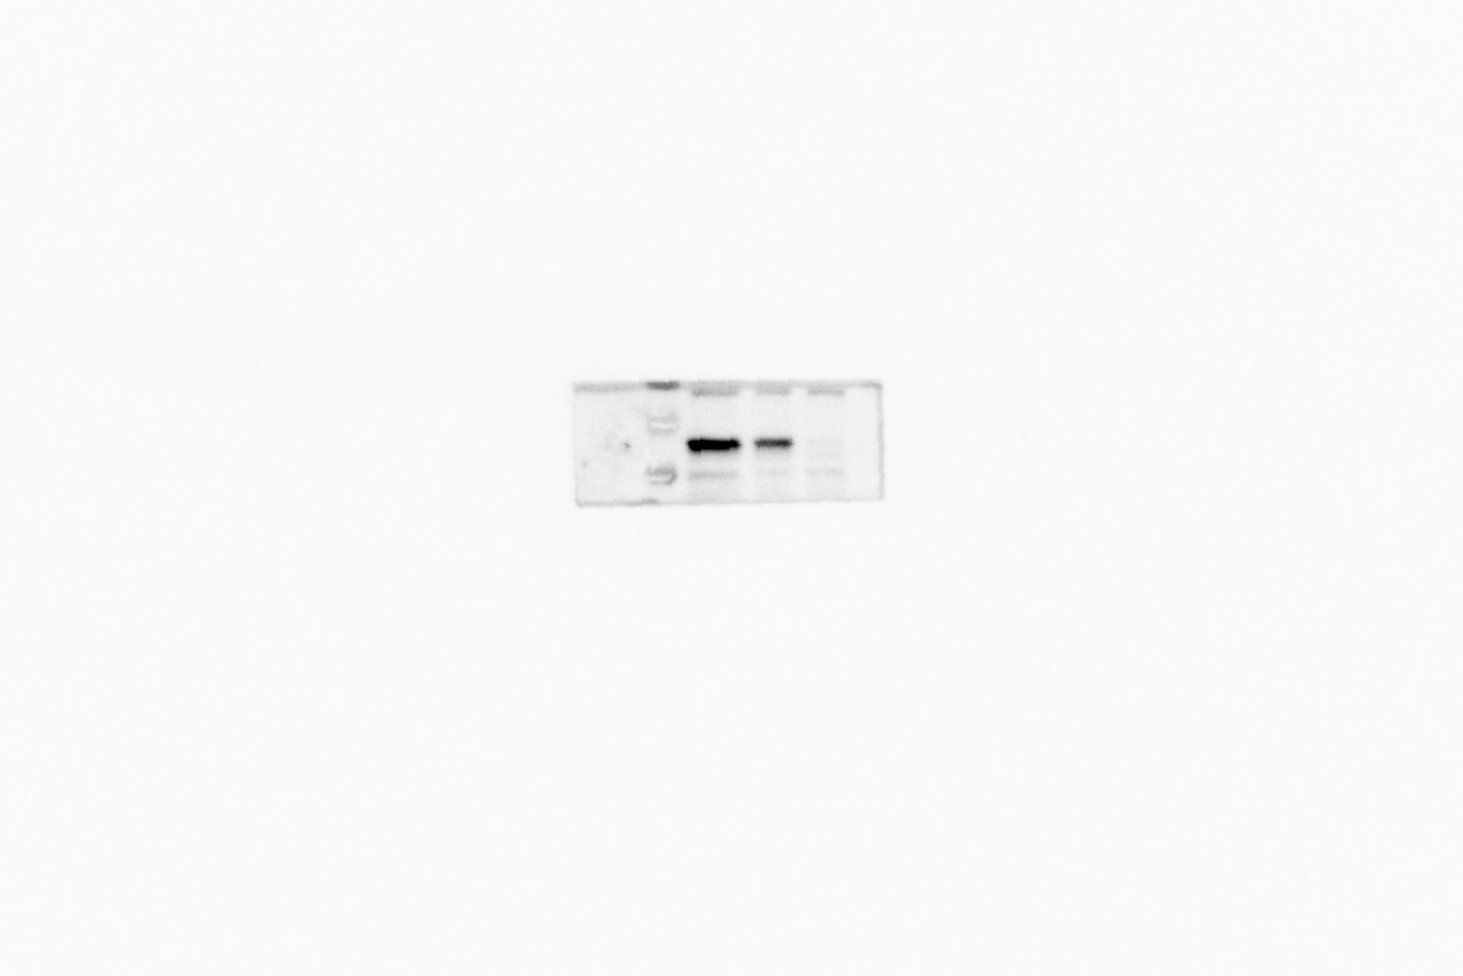

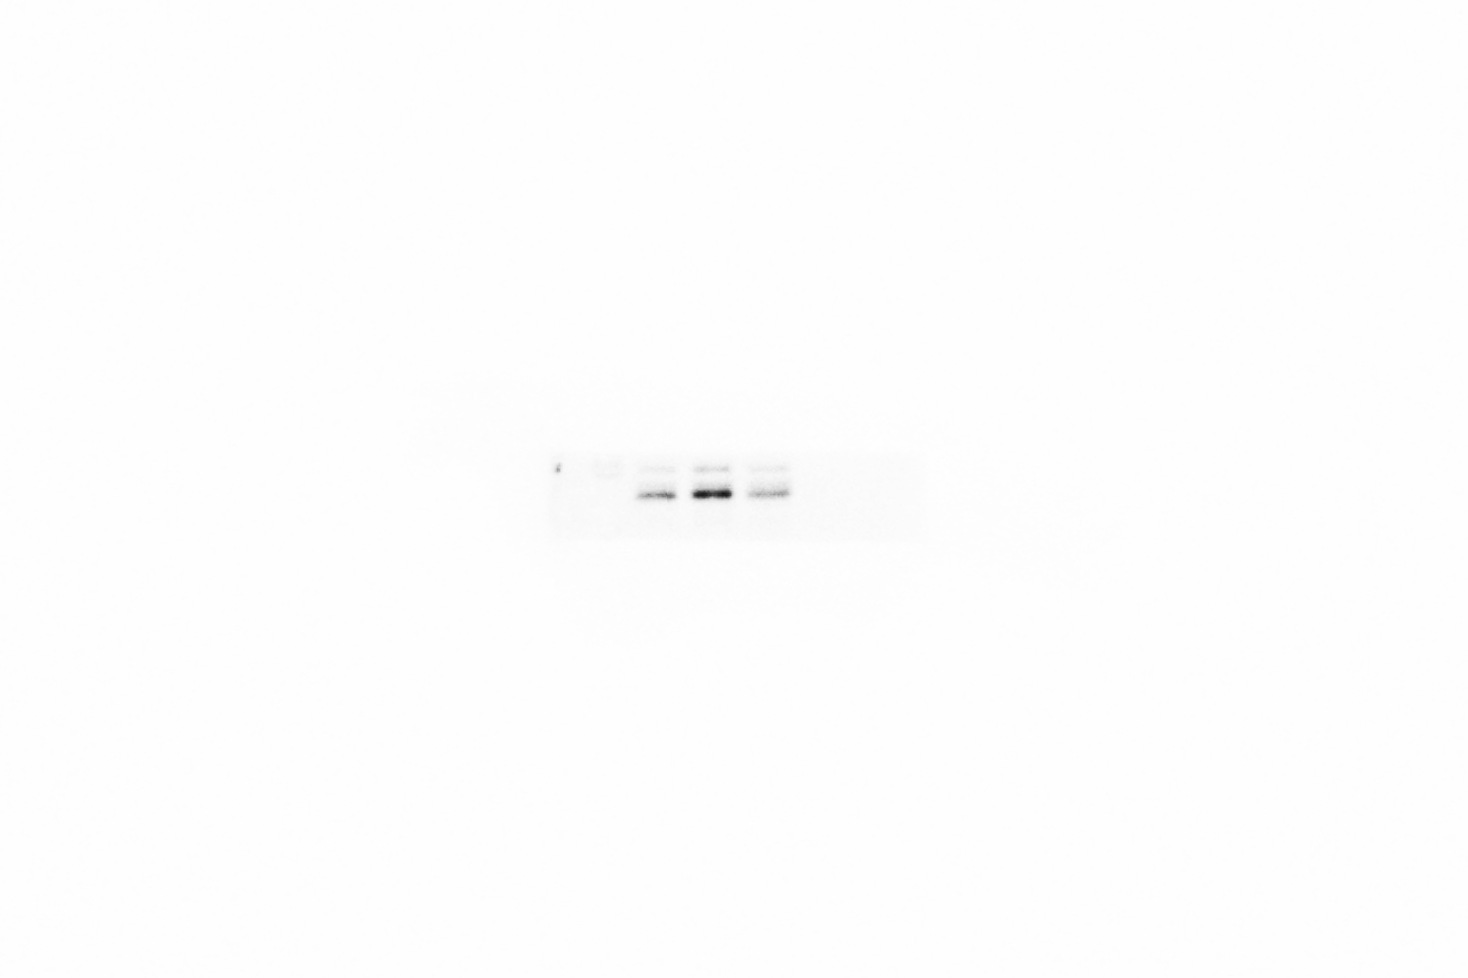


FoxO1 →

2 mM MPP+

–

20 µM 8-Gingerol

0.5 µM wortmannin

+

+

+

+

+

Figure 5 (A)

← 31 kDa

← 53 kDa

← 17 kDa

← 37 kDa

2mM MPP+

C

–

20

GAPDH→

GSDMD N term →

GSDMD →


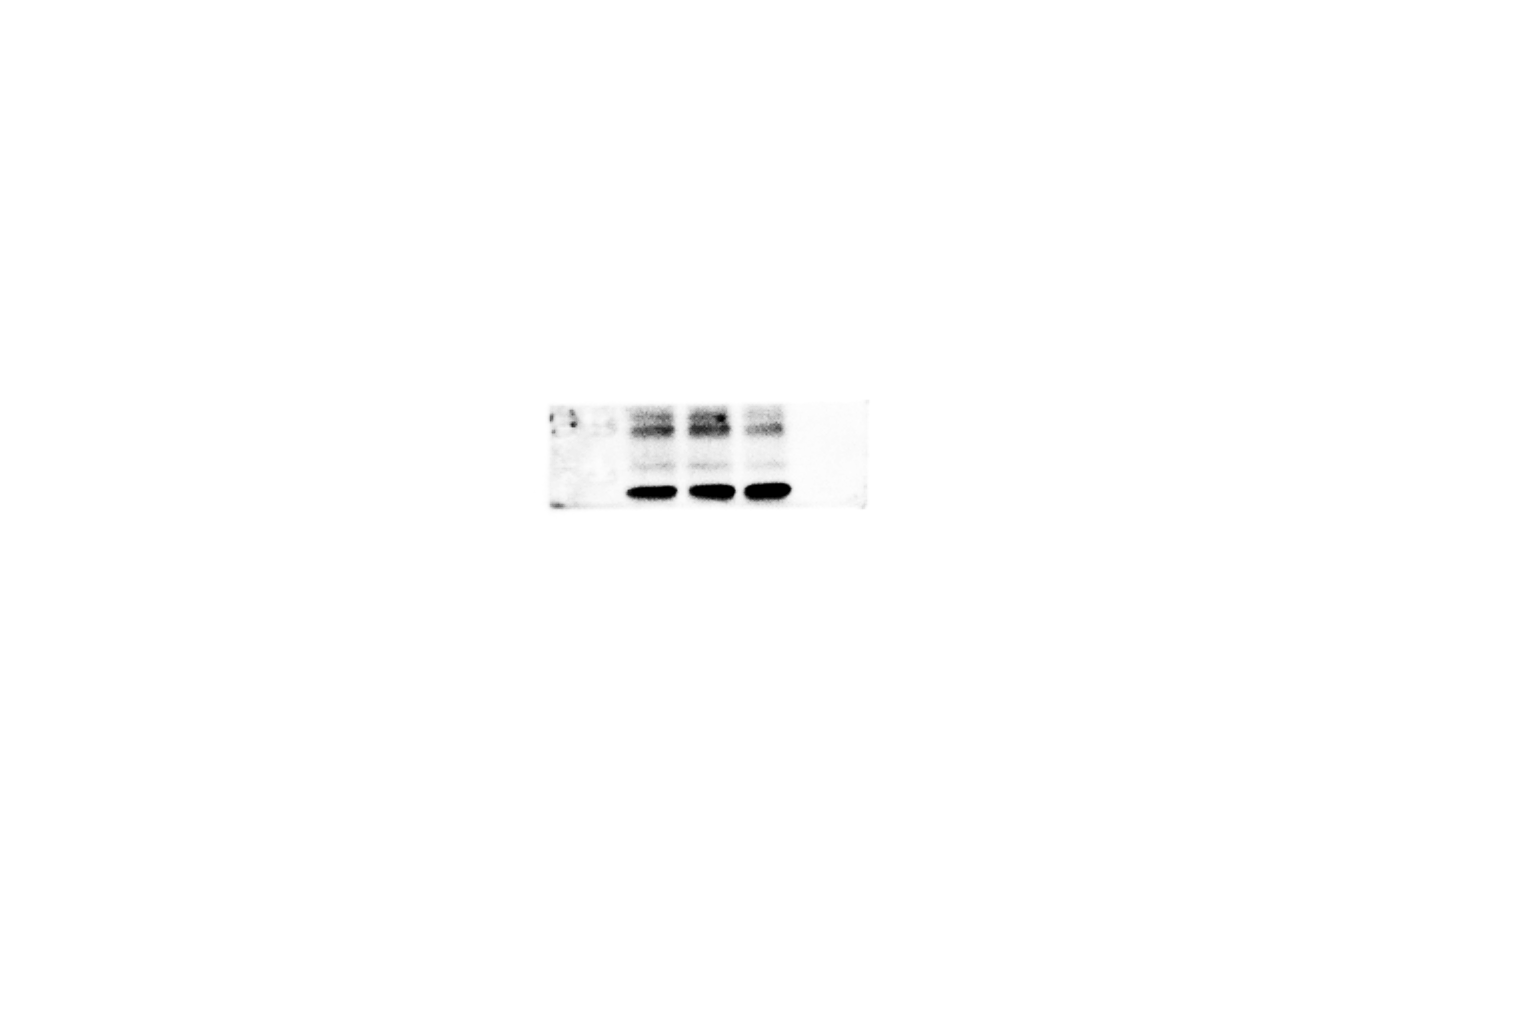

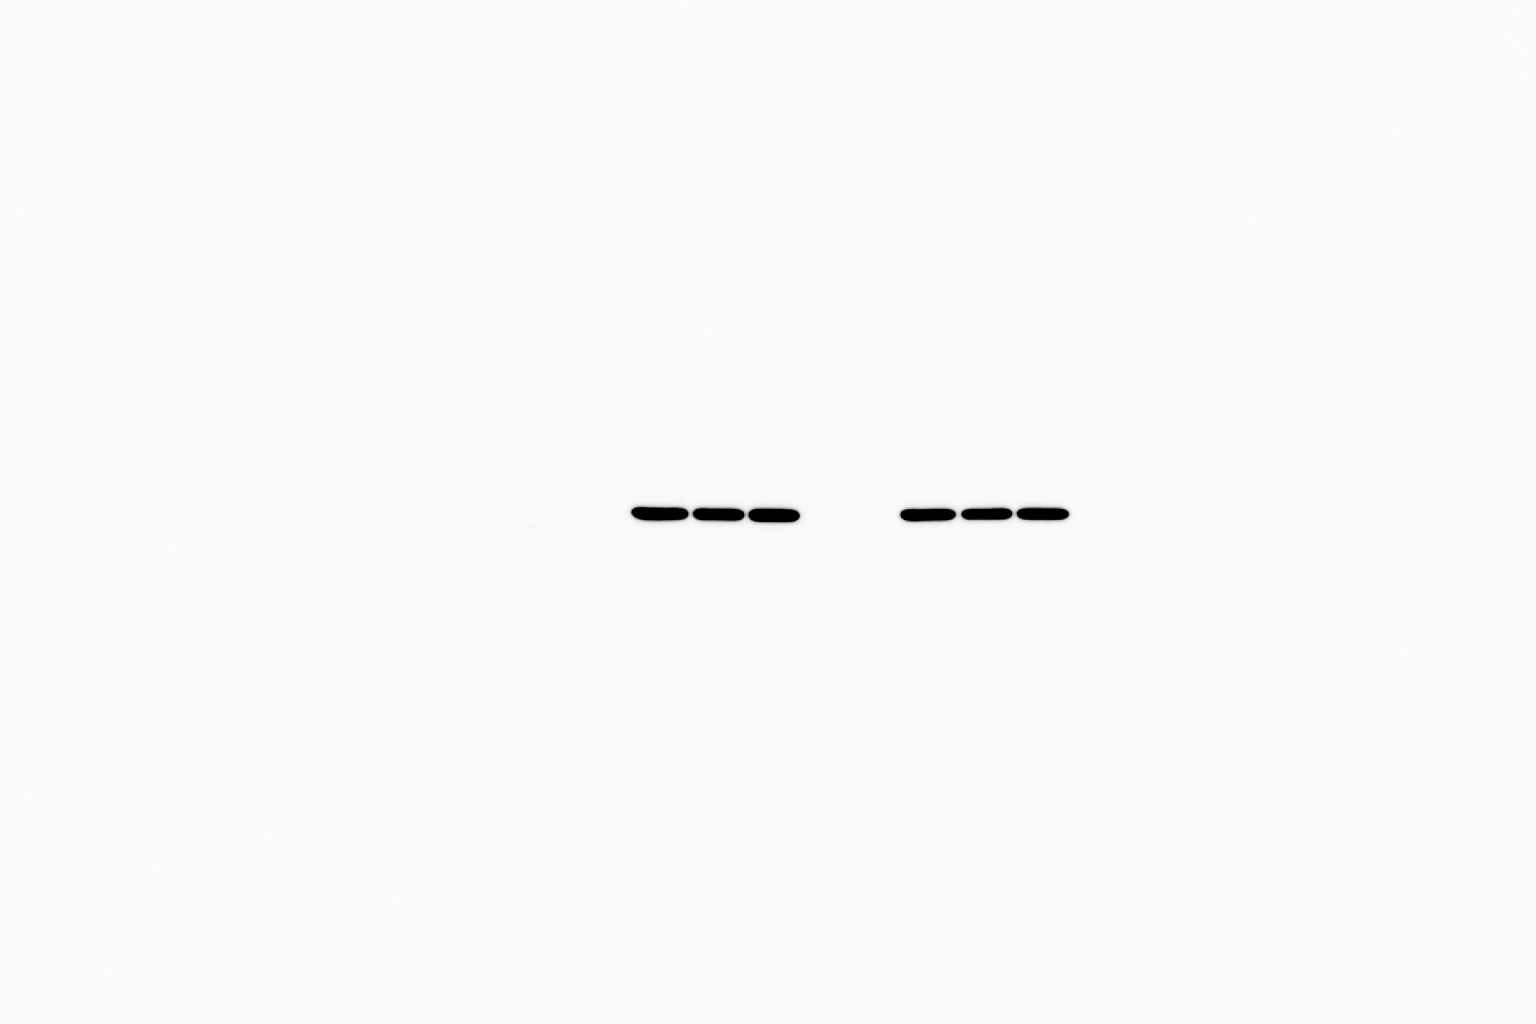


cleaved-IL-1β →


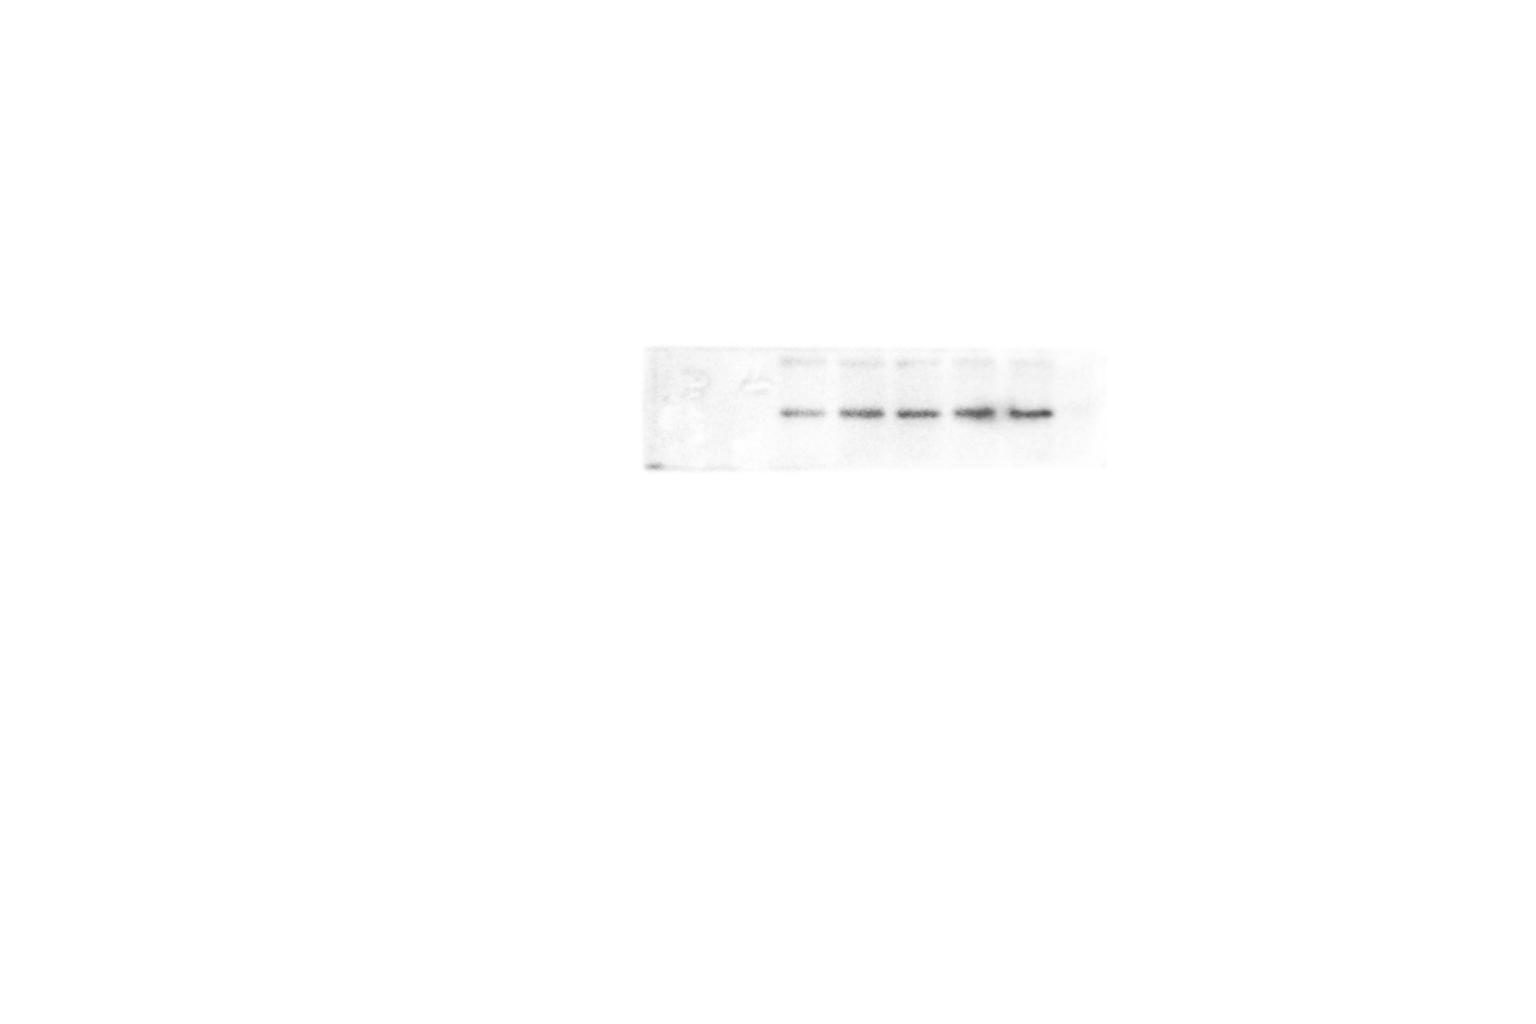


8-Gingerol (µM)


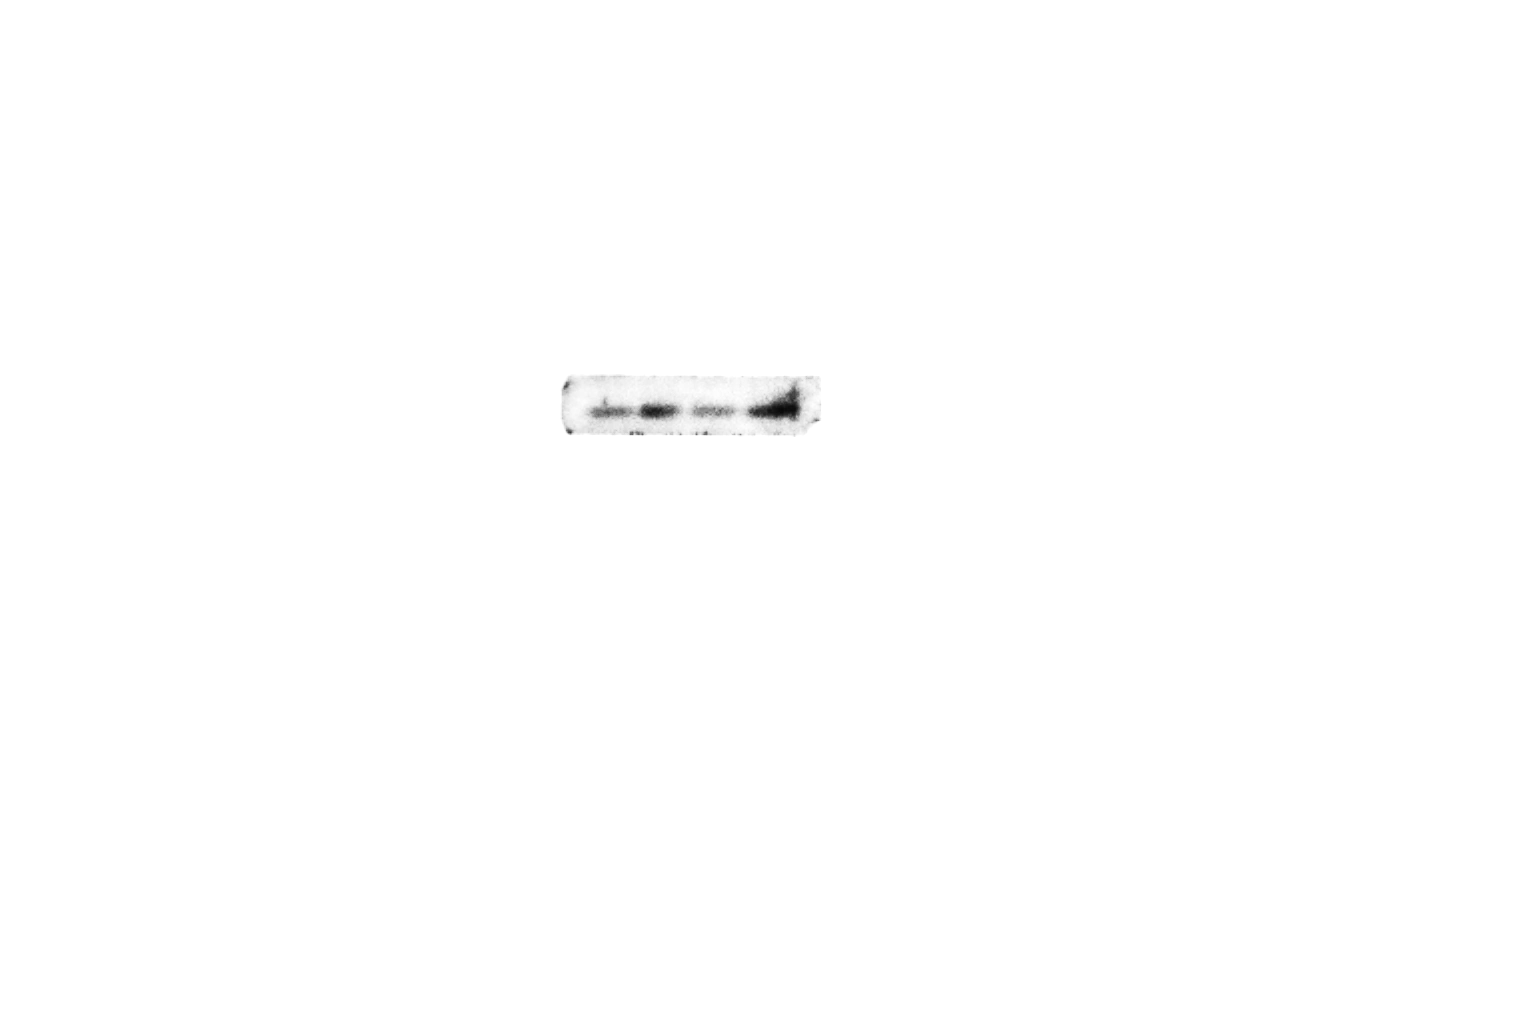


← 70 kDa

← 118 kDa

← 22 kDa

← 17 kDa

← 37 kDa

← 44 kDa

Figure 7 (A)


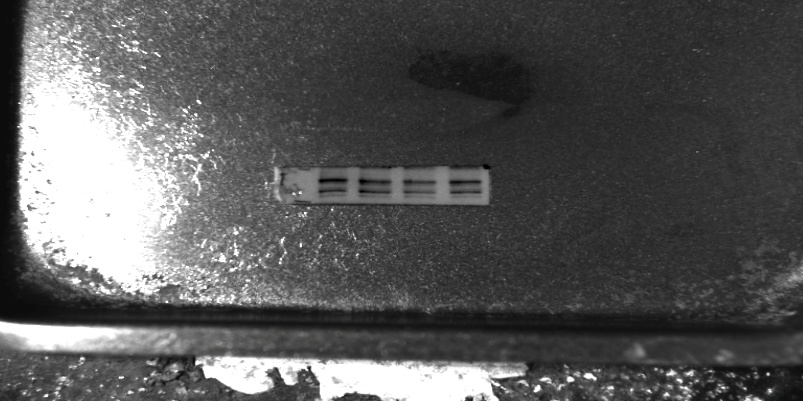

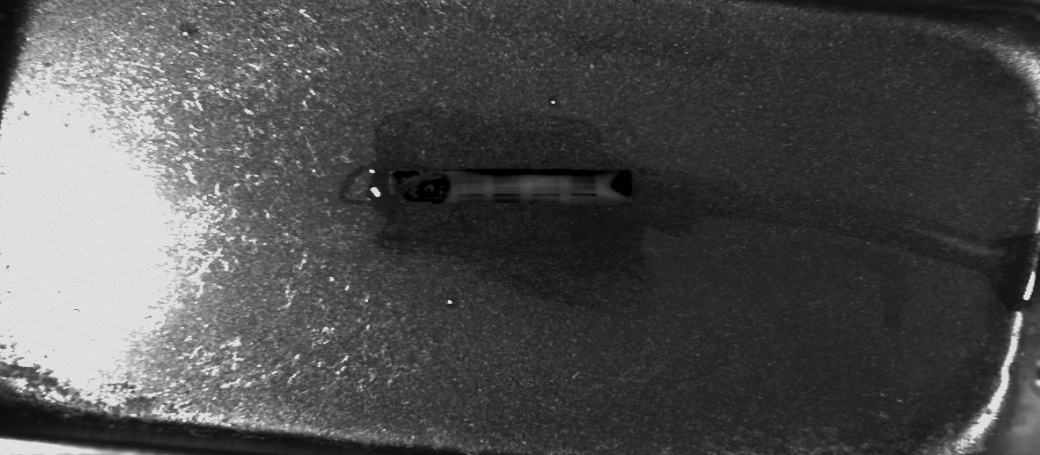

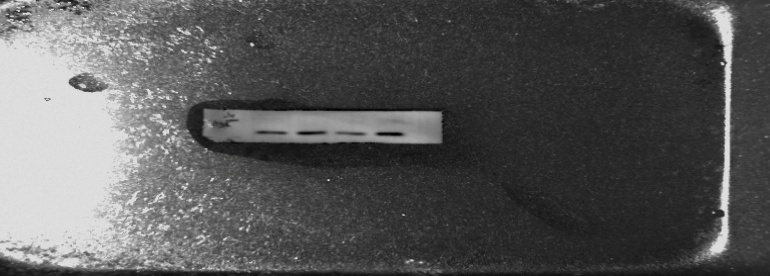

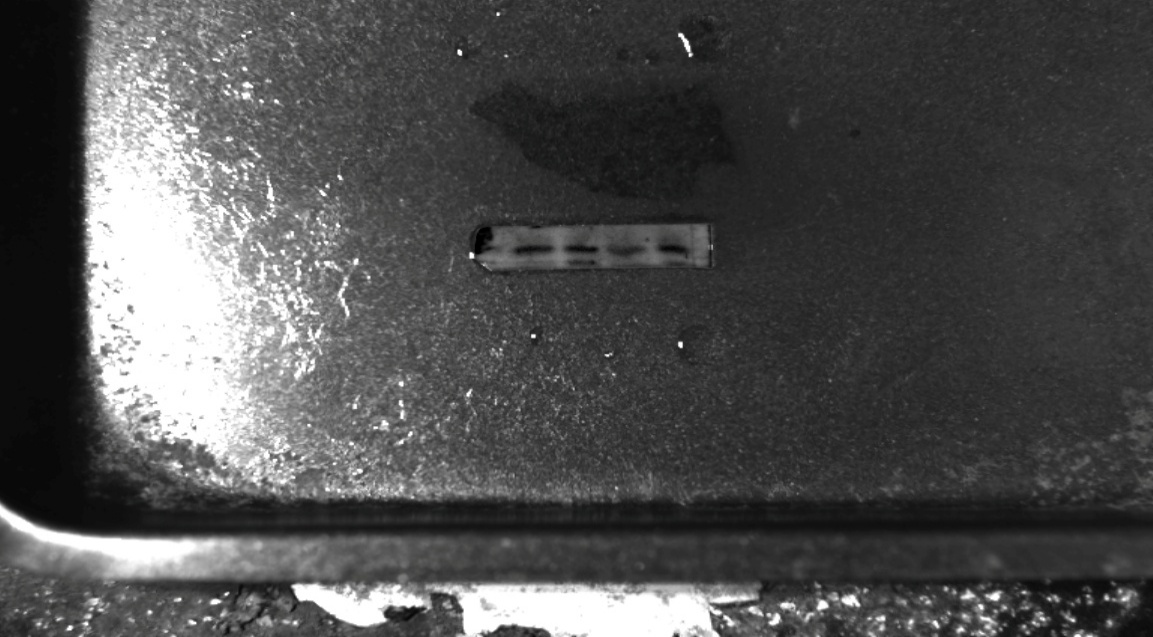

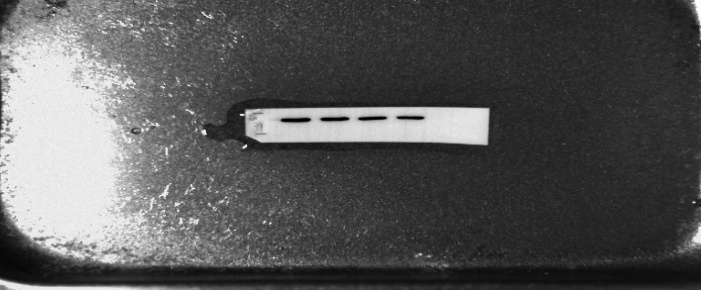

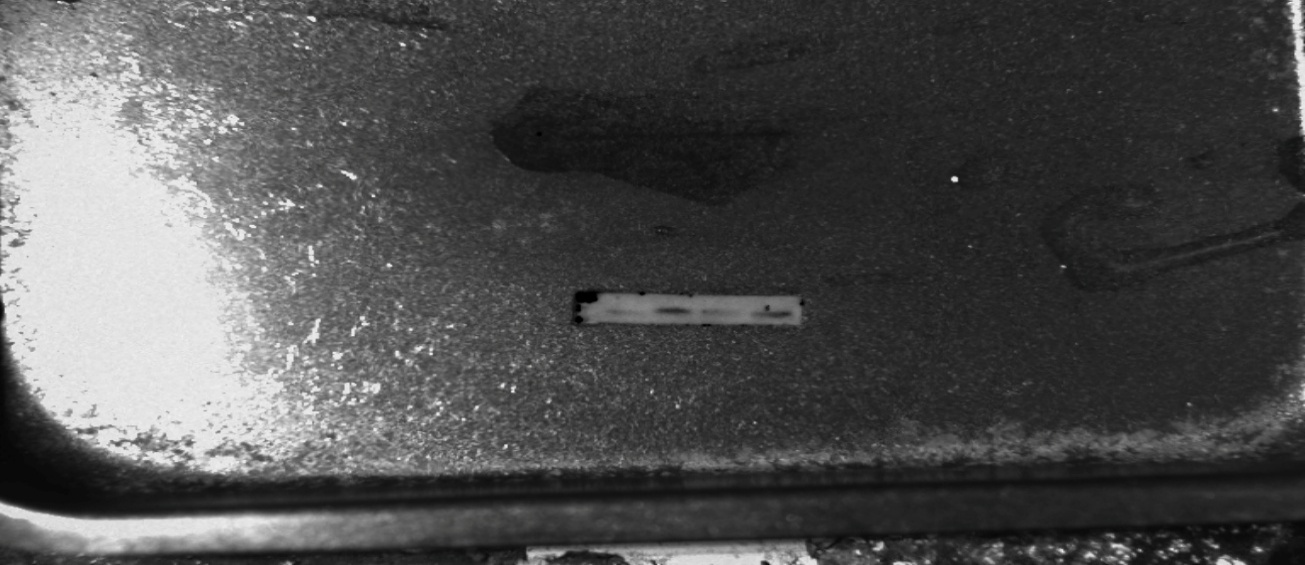


← 37 kDa

← 18 kDa

← 18 kDa

← 118 kDa

← 22 kDa

← 44 kDa

ASC →

cleaved caspase-1 →

NLRP3 →

TXNIP →

cleaved IL-1β →

GAPDH →


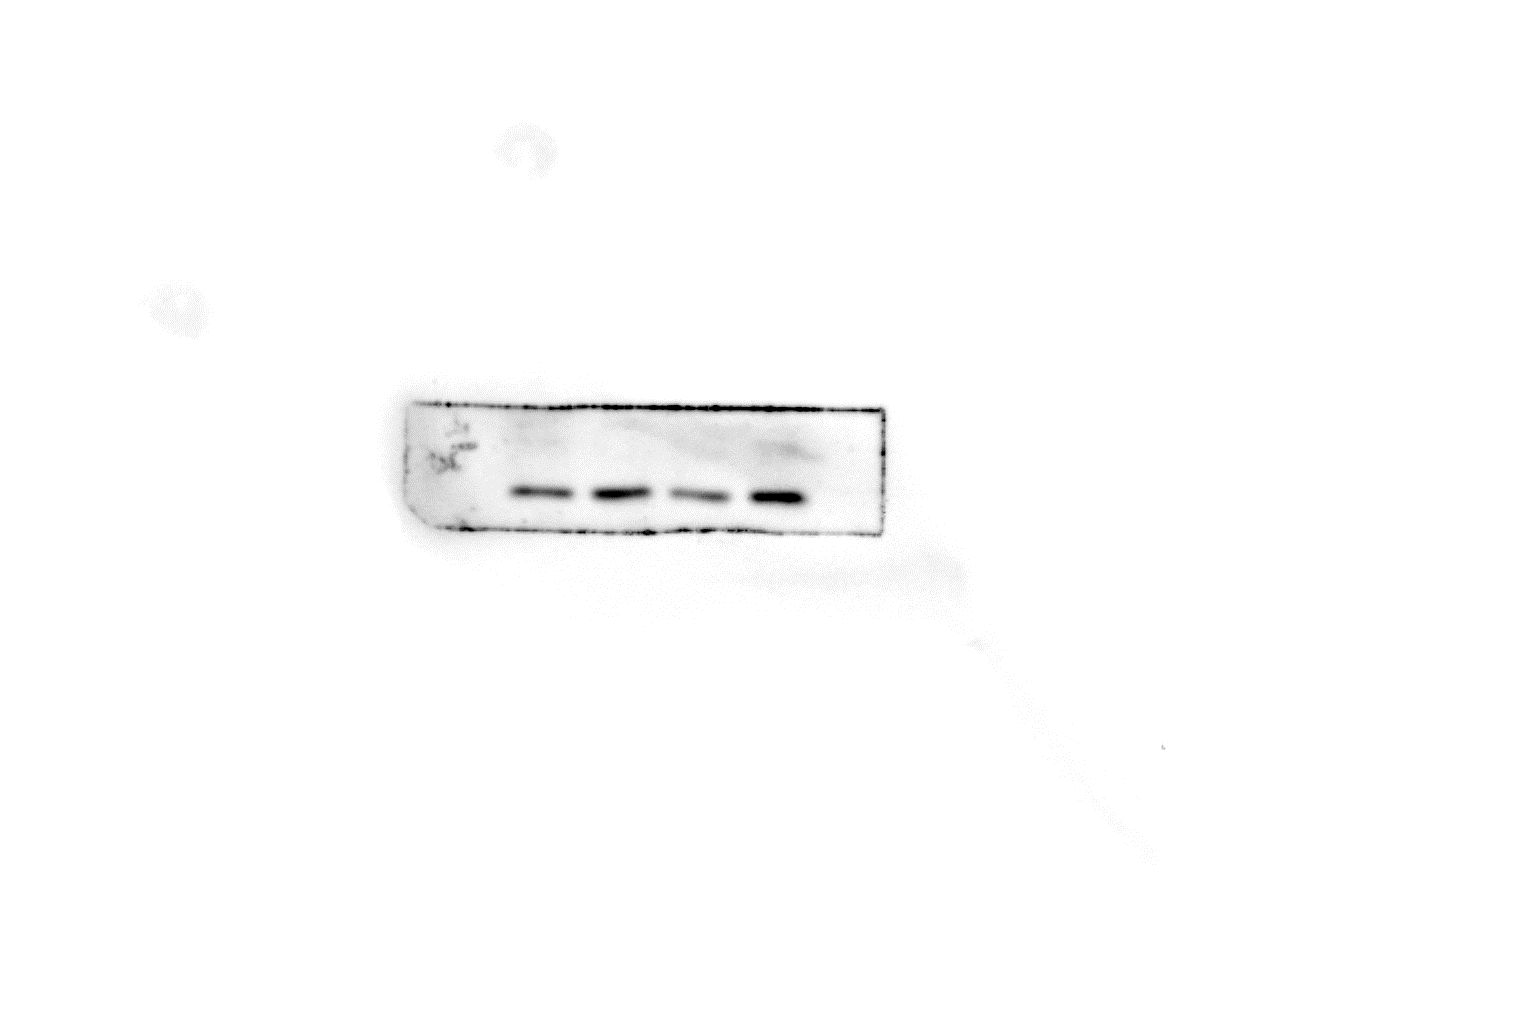

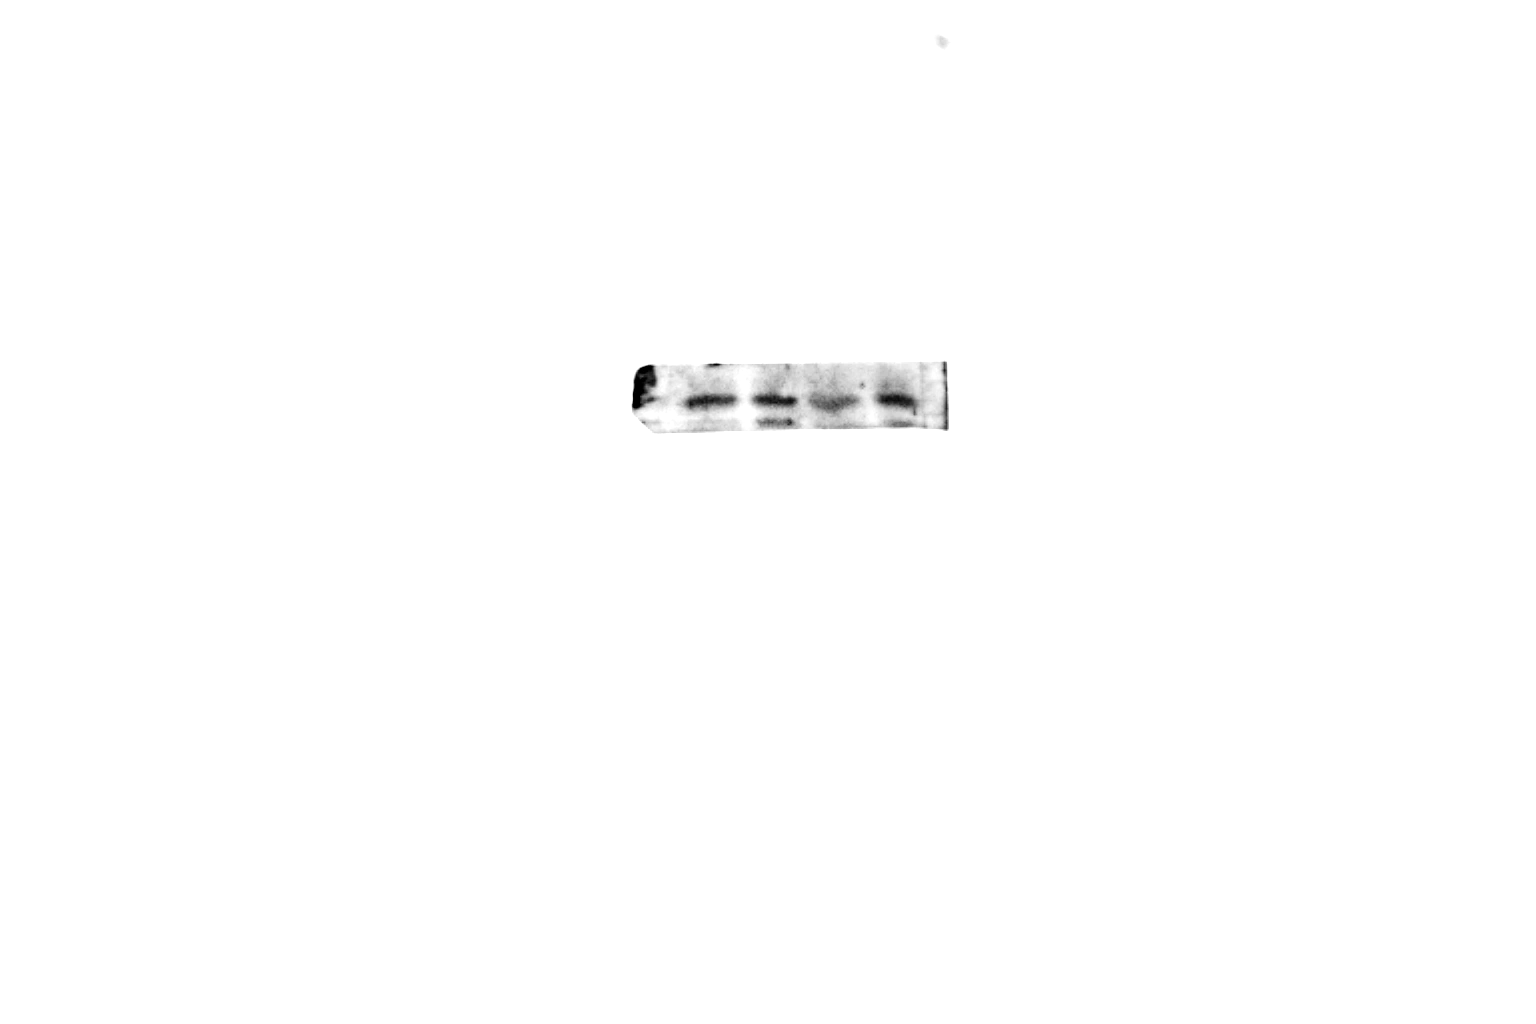

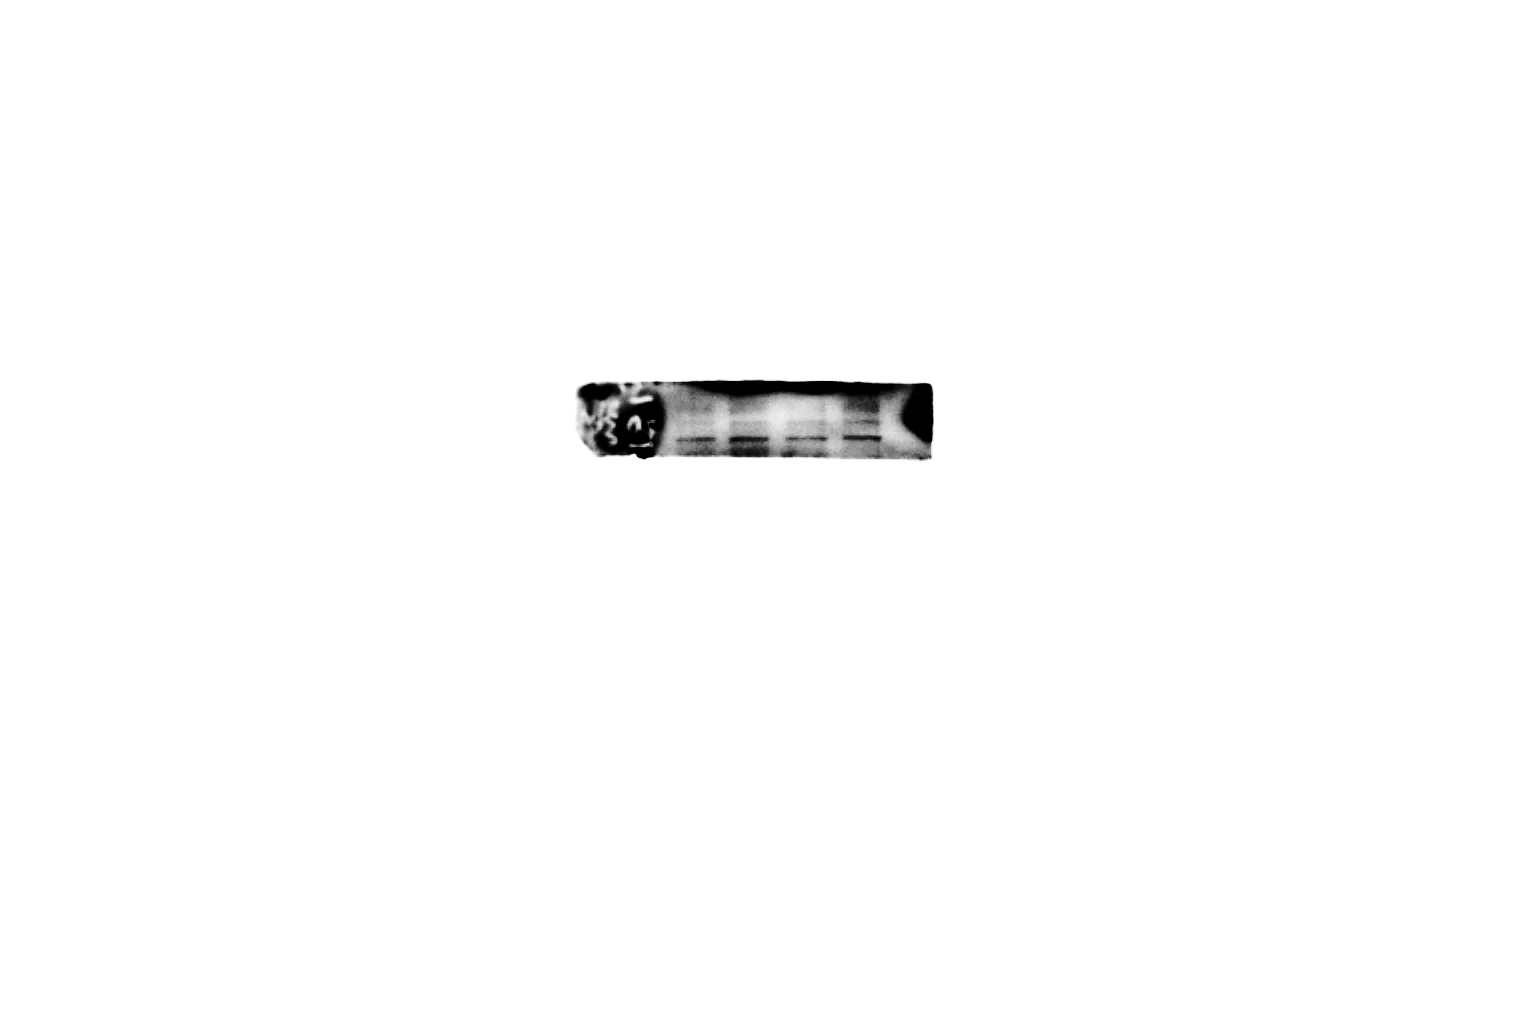

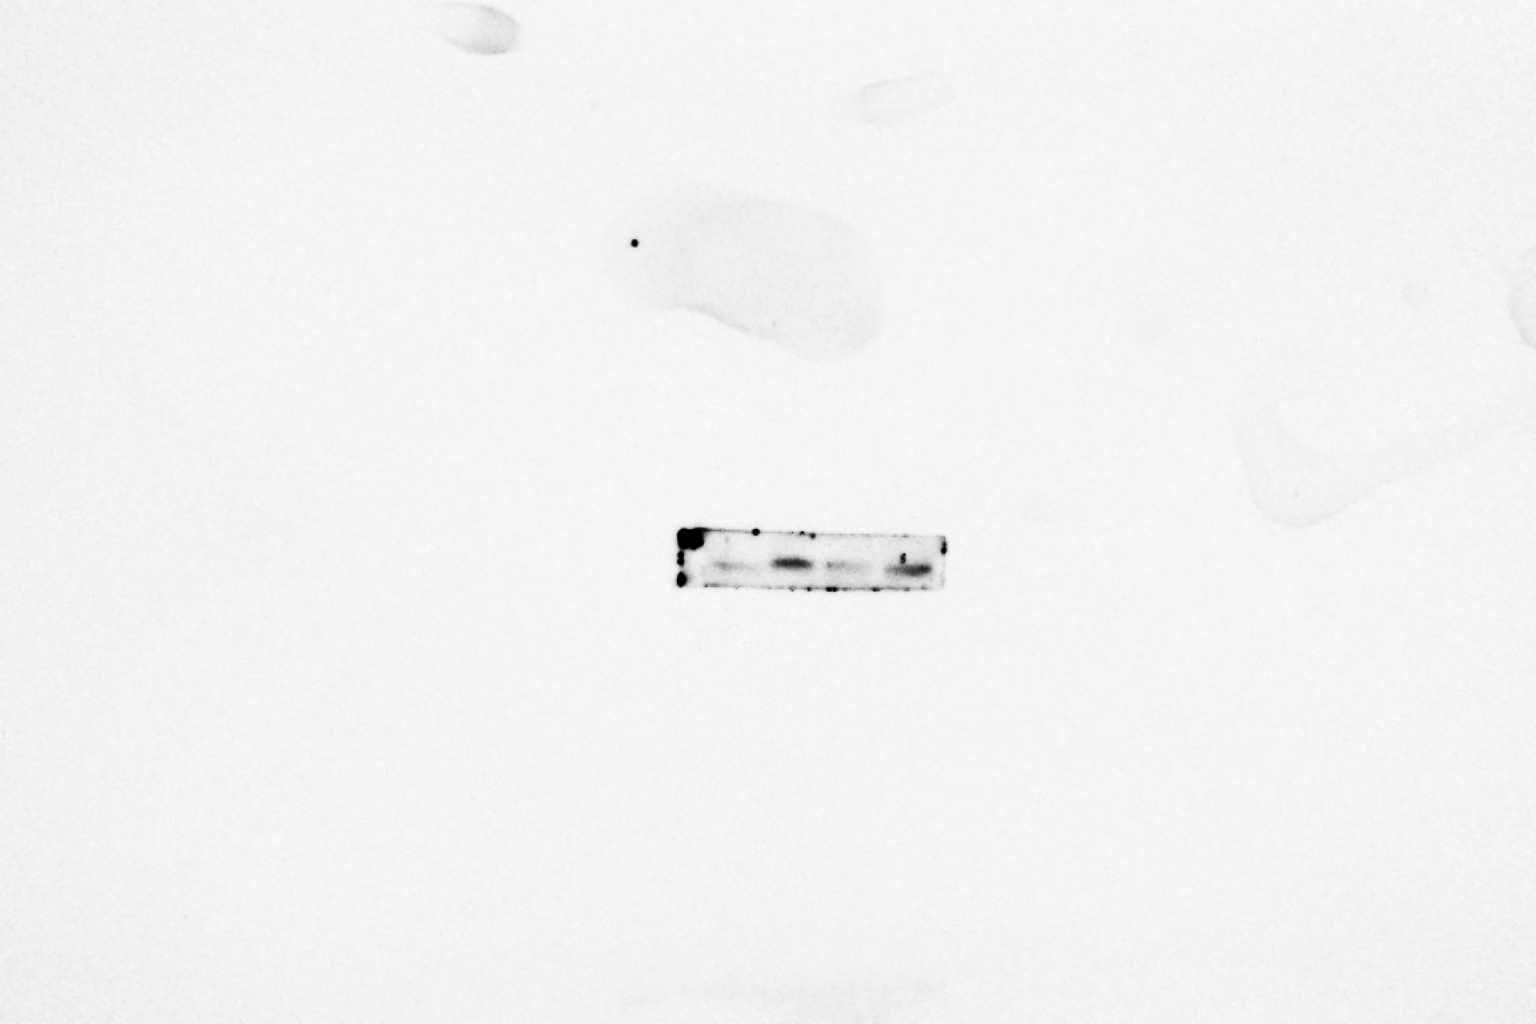

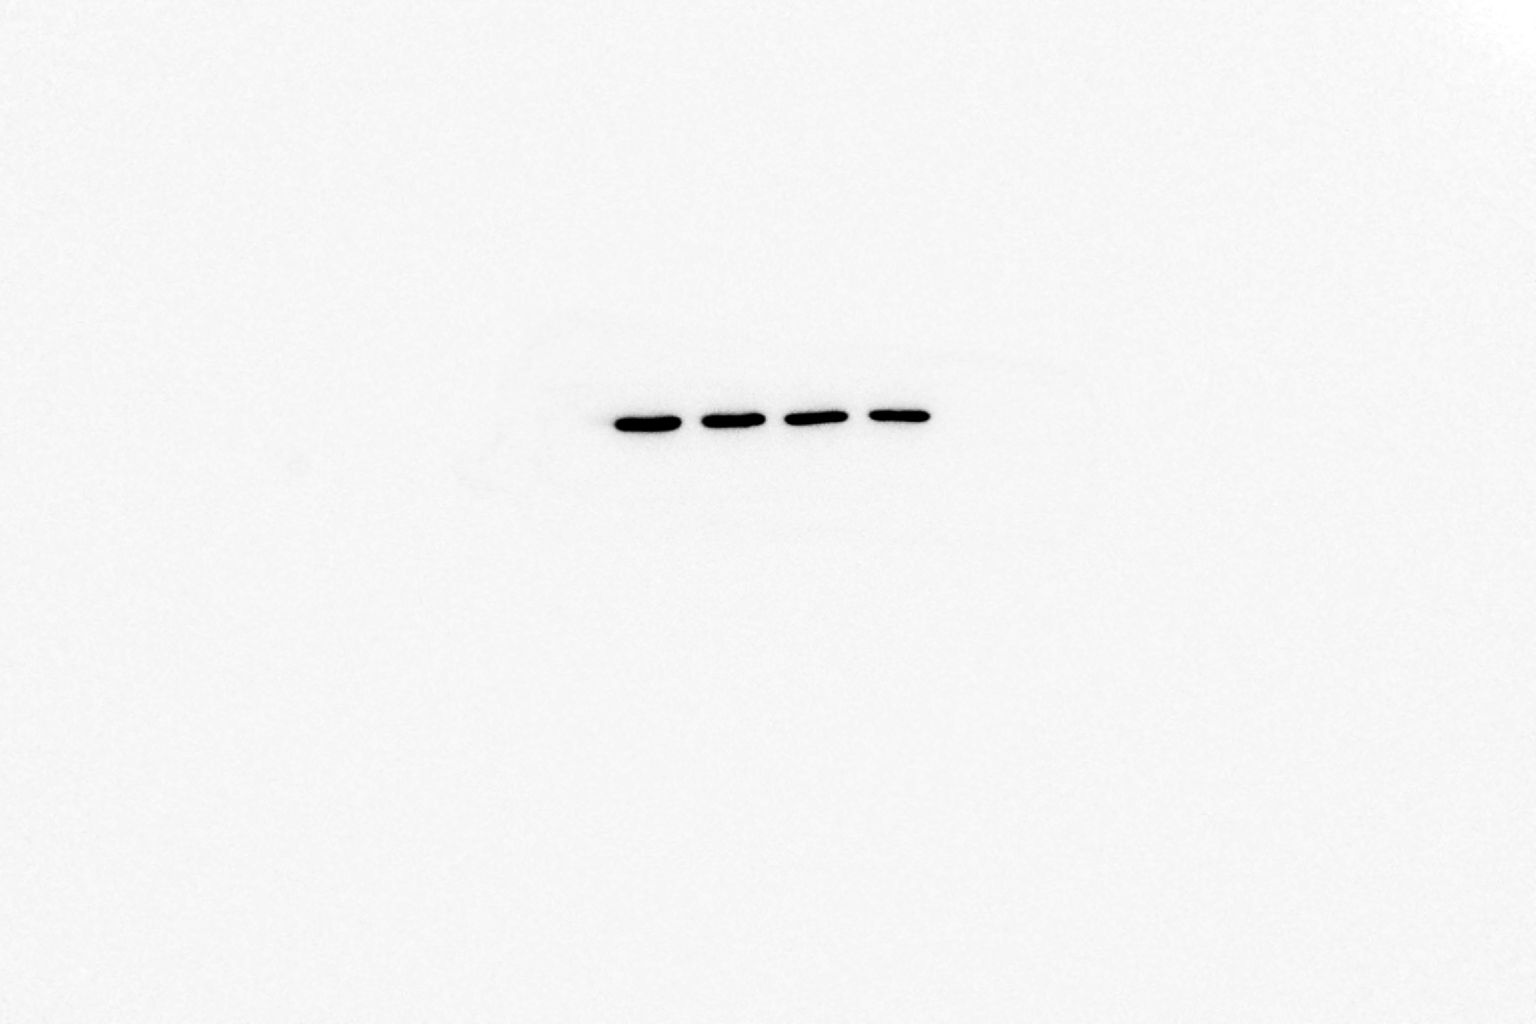

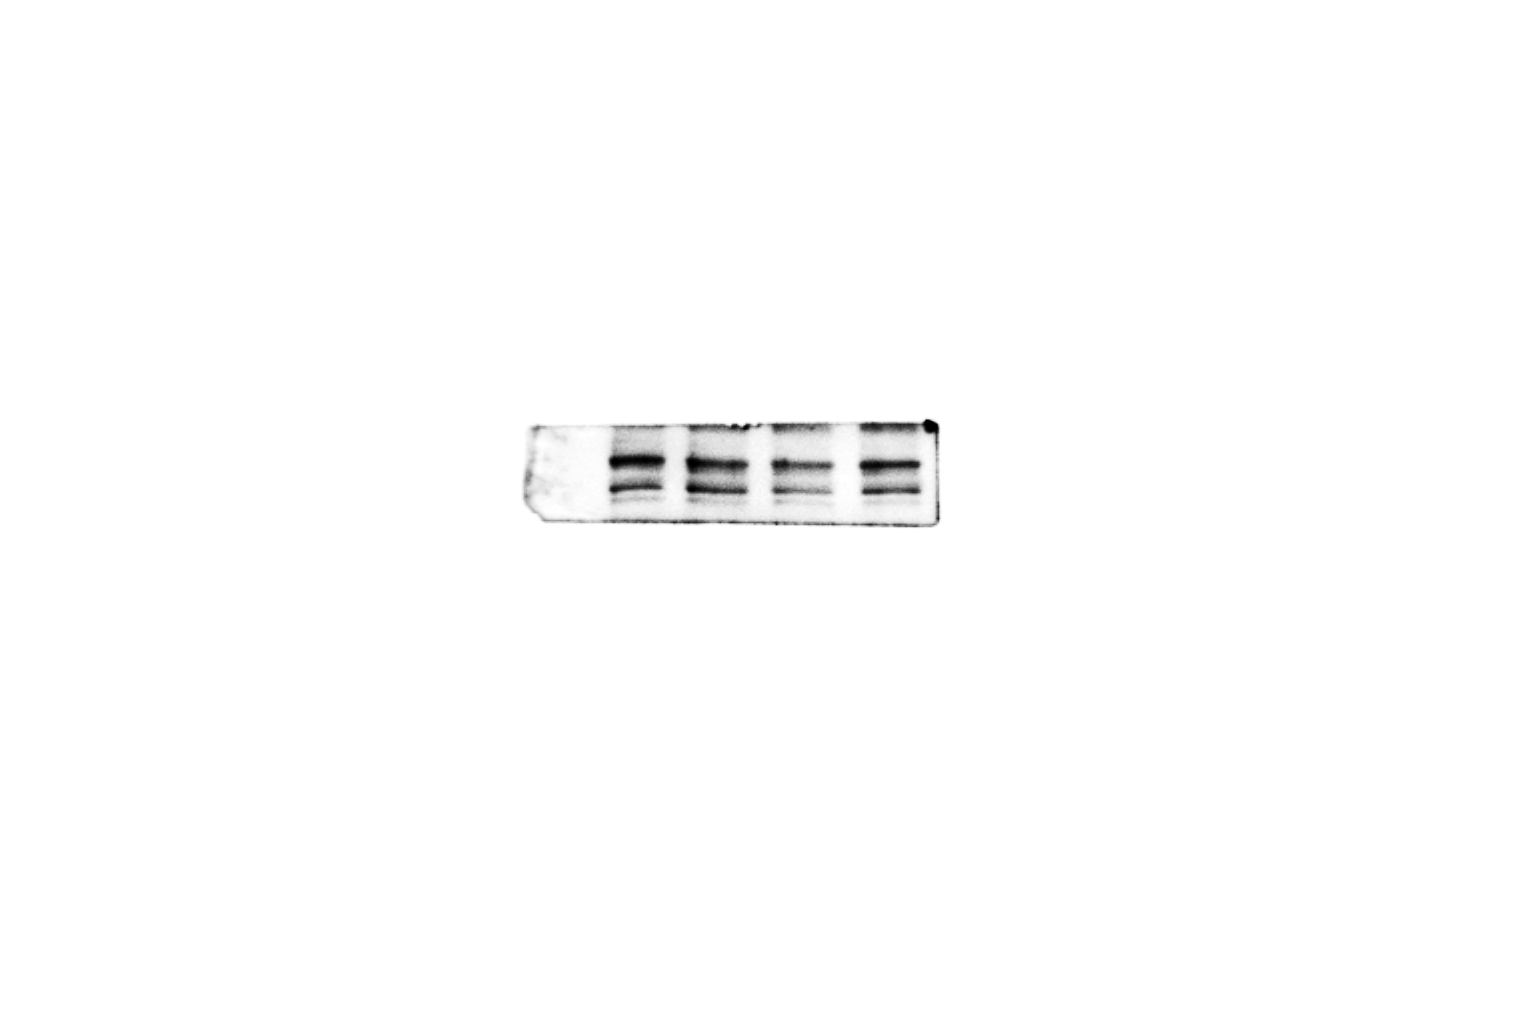


2 mM MPP+

–

20 µM 8-Gingerol

0.5 µM wortmannin

+

+

+

+

+
